# Supplementary material for: Latitudinal and bathymetrical species richness patterns in the NW Pacific and adjacent Arctic Ocean
Source: Springer Nature journal article supplement (doi:10.1038/s41598-019-45813-9), 2019-06-26

## Latitudinal and bathymetrical species richness patterns in the NW Pacific and adjacent Arctic Ocean

**Hanieh Saeedi**<sup>1,2,3\*</sup>, **Mark J. Costello**<sup>4</sup>, **Dan Warren**<sup>5</sup>, **Angelika Brandt**<sup>1,2</sup>

<sup>1\*</sup> Senckenberg Research Institute and Museum, Senckenberganlage 25, 60325 Frankfurt am Main, Germany

<sup>2\*</sup> Goethe-University of Frankfurt, FB 15, Institute for Ecology, Evolution and Diversity, Max-von-Laue-Str. 13, 60439 Frankfurt am Main, Germany

<sup>3\*</sup> OBIS data manager, Deep-Sea Node, Frankfurt am Main, Germany

<sup>4</sup> Institute of Marine Science, University of Auckland, Auckland 1142, New Zealand

<sup>5</sup> Senckenberg Biodiversity and Climate Research Centre, Senckenberganlage 25, 60325 Frankfurt am Main, Germany

**Table S1.** Datasets used in this study. The first 145 datasets were extracted from GBIF and the remaining 204 from OBIS. Each is ranked by number of records per dataset.

| Dataset title as provided in GBIF or OBIS                                                                           | Number of Records |
|---------------------------------------------------------------------------------------------------------------------|-------------------|
| NMNH Extant Specimen Records                                                                                        | 56000             |
| Fish specimens of Kagoshima University Museum                                                                       | 34000             |
| The molluscs collection (IM) of the Muséum national d'Histoire naturelle (MNHN - Paris)                             | 15000             |
| Zooplankton Eastern Arctic Ocean Polarstern, 1995-1998                                                              | 12000             |
| CAS Invertebrate Zoology (IZ)                                                                                       | 11000             |
| Archives of the Arctic Seas Zooplankton                                                                             | 10000             |
| NOAA Deep Sea Corals Research and Technology Program                                                                | 7000              |
| Arctic Ocean Diversity                                                                                              | 6000              |
| Field Museum of Natural History (Zoology) Fish Collection                                                           | 6000              |
| Arctic benthic invertebrate collection of the Zoological Institute of the Russian Academy of Science                | 5000              |
| Queensland Museum provider for OZCAM                                                                                | 5000              |
| Continuous Plankton Recorder Dataset (SAHFOS)                                                                       | 4000              |
| Mollusca collection of National Museum of Nature and Science                                                        | 4000              |
| Diveboard - Scuba diving citizen science observations                                                               | 3000              |
| Fish collection of National Museum of Nature and Science                                                            | 3000              |
| Fishbase                                                                                                            | 3000              |
| Invertebrates Collection of the Swedish Museum of Natural History                                                   | 2000              |
| LACM Vertebrate Collection                                                                                          | 2000              |
| Ophiuroidea collections of the Zoological Institute Russian Academy of Sciences                                     | 2000              |
| Vulnerable marine ecosystems in the South Pacific Ocean region                                                      | 2000              |
| Composition and distribution of the biomass of zooplankton in the central Arctic Basin 1975, 1976, 1977             | 1000              |
| Crustacea Collection of Natural History Museum and Institute, Chiba                                                 | 1000              |
| Fish Collection of Hokkaido University                                                                              | 1000              |
| SIO Marine Vertebrate Collection                                                                                    | 1000              |
| Structures and Nutrition Requirements of Macrozoobenthic Communities in the area of the Lomonossov Ridge, 1995-1998 | 1000              |
| The fishes collection (IC) of the Muséum national d'Histoire naturelle (MNHN - Paris)                               | 1000              |
| UWFC Ichthyology Collection                                                                                         | 1000              |
| Museum of Comparative Zoology, Harvard University                                                                   | 863               |
| Diversity of the Indo-Pacific (DIPnet)                                                                              | 859               |
| Mollusca specimens of Toyama Science Museum                                                                         | 858               |
| Biological observations from the Dana Expedition Reports                                                            | 625               |
| Occurrence records of southern African aquatic biodiversity                                                         | 584               |

|                                                                                                                                                                  |     |
|------------------------------------------------------------------------------------------------------------------------------------------------------------------|-----|
| Museums Victoria provider for OZCAM                                                                                                                              | 566 |
| Natural History Museum (London) Collection Specimens                                                                                                             | 530 |
| COMARGIS: Information System on Continental Margin Ecosystems                                                                                                    | 503 |
| RBINS DaRWIN                                                                                                                                                     | 481 |
| Bernice P. Bishop Museum                                                                                                                                         | 475 |
| The echinoderm collection (IE) of the Muséum national d'Histoire naturelle (MNHN - Paris)                                                                        | 469 |
| IPOE_Benthos_Steffens                                                                                                                                            | 454 |
| Marine invertebrate(ECHINODERMATA) specimen database of Osaka Museum of Natural History                                                                          | 424 |
| Fish Collection of Natural History Museum and Institute, Chiba                                                                                                   | 385 |
| Australian Institute of Marine Science (AIMS) - Surveys of Octocorals communities, benthic cover and environmental factors on coral reefs of Palau (2003 - 2005) | 376 |
| Vertebrate Zoology Division - Ichthyology, Yale Peabody Museum                                                                                                   | 343 |
| KUBI Ichthyology Tissue Collection                                                                                                                               | 322 |
| The crustaceans collection (IU) of the Muséum national d'Histoire naturelle (MNHN - Paris)                                                                       | 318 |
| Scleractinia specimens of Kuroshio Biological Research Foundation                                                                                                | 294 |
| Arctic Marine Fish Museum Specimens                                                                                                                              | 245 |
| Invertebrate Zoology Division, Yale Peabody Museum                                                                                                               | 224 |
| Mollusca specimens of Wakayama Prefectural Museum of Natural History                                                                                             | 223 |
| Planktic foraminifera abundance of Hole 7-62A                                                                                                                    | 212 |
| Marine Invertebrata specimen database of Osaka Museum of Natutal History                                                                                         | 206 |
| Gorgonacea specimens of Kuroshio Biological Research Foundation                                                                                                  | 197 |
| Zoological Museum Amsterdam, University of Amsterdam (NL) - Bryozoa                                                                                              | 188 |
| Australian Institute of Marine Science (AIMS) - Surveys of Octocoral communities, benthic cover and environmental factors on coral reefs of Hong Kong. (1999)    | 173 |
| Crustacea specimens of Ryukyu University Museum (Fujukan)                                                                                                        | 157 |
| Natural History Museum Rotterdam (NL) - Mollusca collection                                                                                                      | 150 |
| Fish Collection of Coastal Branch of Natural History Museum and Institute, Chiba                                                                                 | 140 |
| KUBI Ichthyology Collection                                                                                                                                      | 134 |
| Echinodermata specimens of Kuroshio Biological Research Foundation                                                                                               | 124 |
| Molluscus specimens of Toyohashi Museum of Natural History                                                                                                       | 107 |
| Galathea II, Danish Deep Sea Expedition 1950-52                                                                                                                  | 106 |
| Kamptozoa collection of National Museum of Nature and Science                                                                                                    | 99  |
| UF FLMNH Ichthyology                                                                                                                                             | 97  |
| Biological Reference Collections ICM CSIC                                                                                                                        | 89  |
| Invertebrates (Type Specimens) of the Swedish Museum of Natural History                                                                                          | 74  |
| Macrozoobenthos composition, abundance and biomass in the Arctic Ocean along a transect between Svalbard and the Makarov Basin 1991                              | 69  |
| Catalogue of the type specimens of sea stars (Asteroidea, Echinodermata) from research collections of the Zoological Institute, Russian Academy of Sciences      | 68  |
| Relative abundance of planktonic foraminifera in Pliocene and Pleistocene sediments of DSDP Hole 32-310 from Hess Rise, Central North Pacific (Table II)         | 60  |
| Mollusca specimens of Kuroshio Biological Research Foundation                                                                                                    | 57  |
| Foraminifera abundance of Hole 57-438A                                                                                                                           | 52  |
| Field Museum of Natural History (Zoology) Invertebrate Collection                                                                                                | 51  |
| UAM Invertebrate Collection (Arctos)                                                                                                                             | 48  |
| Foraminifera abundance of Hole 61-462                                                                                                                            | 40  |
| Oregon State Ichthyology Collection                                                                                                                              | 38  |
| Biodiversity Research and Teaching Collections - TCWC Vertebrates                                                                                                | 32  |
| Distribution data of Arctic species of genus Microporella and Pseudoflustra gathered from museum collections                                                     | 31  |
| Royal BC Museum - Invertebrates Collection                                                                                                                       | 29  |
| CSIRO Ichthyology provider for OZCAM                                                                                                                             | 28  |
| Five new species of the damselfish genus Chromis (Perciformes: Labroidei: Pomacentridae) from deep coral reefs in the tropical western Pacific                   | 28  |
| Ifremer BIOCEAN database (Deep Sea Benthic Fauna)                                                                                                                | 26  |
| (Table T17) Planktonic foraminifera stratigraphy of ODP Hole 198-1211A, Zones P14-P18                                                                            | 22  |

|                                                                                                                                                                            |    |
|----------------------------------------------------------------------------------------------------------------------------------------------------------------------------|----|
| Códigos de barras de la vida en peces y zooplancton de México                                                                                                              | 22 |
| Catalogue of the type specimens of Pogonophora (Annelida; seu Polychaeta: Siboglinidae) from research collections of the Zoological Institute, Russian Academy of Sciences | 21 |
| Range table from planktonic foraminifers in ODP Hole 145-883B                                                                                                              | 18 |
| orstom_macassar_corindon_1980                                                                                                                                              | 17 |
| Type Collection of the Seto Marine Biological Laboratory, Kyoto University                                                                                                 | 17 |
| (Table T12) Planktonic foraminifera stratigraphy of ODP Hole 198-1210A, Zones P14-P18                                                                                      | 15 |
| Foraminifera abundance of Hole 57-438                                                                                                                                      | 14 |
| Ostracoda abundance in DSDP Leg 87 holes                                                                                                                                   | 14 |
| Antarctic Jellyfish                                                                                                                                                        | 12 |
| Foraminifera abundance of Hole 57-440B                                                                                                                                     | 12 |
| Gunma Museum of Natural History, Molluscan Specimen                                                                                                                        | 12 |
| NIWA Invertebrate Type Collection                                                                                                                                          | 11 |
| Catálogo de los equinodermos recientes de México (Fase II)                                                                                                                 | 10 |
| The cnidarians collection (IK) of the Muséum national d'Histoire naturelle (MNHN - Paris)                                                                                  | 10 |
| Crustacean specimens of Kitakyushu Museum of Natural History & Human History                                                                                               | 9  |
| Planktic foraminifera abundance of Hole 32-305                                                                                                                             | 8  |
| (Table 8) Sample mass, sand fraction and relative abundances of planktonic foraminifera in ODP Holes 127-794A and 127-197B                                                 | 7  |
| Chaetognatha collection of National Museum of Nature and Science                                                                                                           | 7  |
| DMNS Marine Invertebrate Collection (Arctos)                                                                                                                               | 7  |
| Planktic foraminifera abundance of Hole 20-200                                                                                                                             | 7  |
| UAM Fish Collection (Arctos)                                                                                                                                               | 7  |
| (Table 11) Relative frequencies of planktonic foraminifers and cluster arrangement of ODP Holes 127-794A and 127-197B                                                      | 6  |
| (Table 5) Range chart of benthic and planktonic foraminifera of ODP Site 127-797                                                                                           | 5  |
| Foraminifera abundance of Hole 57-440A                                                                                                                                     | 5  |
| Foraminifera abundance of Hole 59-448A                                                                                                                                     | 5  |
| Naturalis National Natural History Museum (NL) – Invertebrate specimens from marine expeditions                                                                            | 5  |
| Planktic foraminifera abundance of Hole 6-47B                                                                                                                              | 5  |
| Sizing Ocean Giants                                                                                                                                                        | 5  |
| (Table 2) Median abundances of macrobenthos in surface sediments                                                                                                           | 4  |
| Cnidaria Collection of the Seto Marine Biological Laboratory, Kyoto University                                                                                             | 4  |
| Echinoderm specimens of Ryukyu University Museum (Fujukan)                                                                                                                 | 4  |
| Foraminifera abundance of Hole 57-440                                                                                                                                      | 4  |
| Planktic foraminifera abundance of Hole 60-458                                                                                                                             | 4  |
| Pycnogonidea specimens of Kuroshio Biological Research Foundation                                                                                                          | 4  |
| Scarabaeoidea y colección de tipos de la colección entomológica del Centro de Estudios en Zoología, Universidad de Guadalajara                                             | 4  |
| Atlantic Reference Centre Museum of Canadian Atlantic Organisms - Invertebrates and Fishes Data                                                                            | 3  |
| Deep-water azooxanthellate Scleractinia from Vanuatu, and Wallis and Futuna Islands                                                                                        | 3  |
| MNA - Sezione di Genova - (Marine Biological Samples)                                                                                                                      | 3  |
| Northern Territory Museum and Art Gallery provider for OZCAM                                                                                                               | 3  |
| Sipuncula collection of National Museum of Nature and Science                                                                                                              | 3  |
| BMSM Bailey-Matthews National Shell Museum                                                                                                                                 | 2  |
| Flatworm specimens of Ryukyu University Museum (Fujukan)                                                                                                                   | 2  |
| Fortalecimiento de las colecciones de ECOSUR. Primera fase                                                                                                                 | 2  |
| Luzonichthys seaver, a new species of Anthiinae (Perciformes, Serranidae) from Pohnpei, Micronesia                                                                         | 2  |
| Megafauna of the UKSRL exploration contract area and eastern Clarion-Clipperton Zone in the Pacific Ocean: Annelida, Arthropoda, Bryozoa, Chordata, Ctenophora, Mollusca   | 2  |
| National Whale and Dolphin Sightings and Strandings Database                                                                                                               | 2  |
| Planktic foraminifera abundance of Hole 20-199                                                                                                                             | 2  |
| Southern Ocean Ostracoda (except Halocypridina)                                                                                                                            | 2  |
| (Table 3) Range chart of benthic and planktonic foraminifera of ODP Site 127-795                                                                                           | 1  |
| ARGOS Satellite Tracking of animals                                                                                                                                        | 1  |
| Arthropoda Collection of the Seto Marine Biological Laboratory, Kyoto University                                                                                           | 1  |

|                                                                                                                                        |        |
|----------------------------------------------------------------------------------------------------------------------------------------|--------|
| Biodiversity Research and Teaching Collections - TCWC Marine Invertebrates                                                             | 1      |
| Canadian Museum of Nature - Fish Collection (OBIS Canada)                                                                              | 1      |
| CNIN/Triatominos (Hemiptera-Heteroptera-Reduviidae)                                                                                    | 1      |
| Foraminifera abundance of Hole 59-448                                                                                                  | 1      |
| In situ observations of Stygiomedusa gigantea                                                                                          | 1      |
| Marine biological observation data from coastal and offshore surveys around New Zealand                                                | 1      |
| Megafauna of the UKSRL exploration contract area and eastern Clarion-Clipperton Zone in the Pacific Ocean: Echinodermata               | 1      |
| Nemertean specimens of Ryukyu University Museum (Fujukan)                                                                              | 1      |
| Planktic foraminifera abundance of Hole 20-200A                                                                                        | 1      |
| Planktic foraminifera abundance of Hole 7-62                                                                                           | 1      |
| Range table from planktonic foraminifers in ODP Hole 145-883C                                                                          | 1      |
| UCM Fish Collection (Arctos)                                                                                                           | 1      |
| World Ocean Database 2009                                                                                                              | 160507 |
| JODC Dataset                                                                                                                           | 88277  |
| CRED Rapid Ecological Assessments of Fish Belt Transect Surveys and Fish Stationary Point Count Surveys in the Pacific Ocean 2000-2010 | 81325  |
| Fishbase occurrences hosted by GBIF-Sweden                                                                                             | 48941  |
| Asia-Pacific Dataset                                                                                                                   | 36482  |
| CRED Rapid Ecological Assessment of Invertebrate in the Pacific Ocean                                                                  | 34904  |
| NMNH Invertebrate Zoology Collections                                                                                                  | 33851  |
| CRED Rapid Ecological Assessments of Coral Population in the Pacific Ocean 2007-2010                                                   | 29181  |
| NCOS1959_Crustacea                                                                                                                     | 25522  |
| Marine Biological Sample Database, JAMSTEC                                                                                             | 23906  |
| Biodiversity Research Museum, Academia Sinica, Taiwan                                                                                  | 19833  |
| NMNH Vertebrate Zoology Fishes Collections                                                                                             | 18436  |
| KOBIS database                                                                                                                         | 16433  |
| NCOS1959_Mollusca                                                                                                                      | 15905  |
| University of Florida Museum of Natural History Invertebrate Zoology Collection                                                        | 12697  |
| Hexacorallians of the World                                                                                                            | 10747  |
| North Pacific Groundfish Observer                                                                                                      | 10228  |
| Ichthyology Collection - Royal Ontario Museum                                                                                          | 9607   |
| Fish specimens                                                                                                                         | 9503   |
| CRED Rapid Ecological Assessment of Benthic Habitat Cover in the Pacific Ocean 2005-2010                                               | 9329   |
| Survey data of tidal flats on the Monitoring sites 1000 project, BDCJ                                                                  | 7883   |
| NCOS                                                                                                                                   | 7859   |
| NCOS1959_Echinodermata                                                                                                                 | 7714   |
| Continuous Plankton Recorder Dataset (SAHFOS) - Pacific Zooplankton                                                                    | 7176   |
| Benthic species from the tropical Pacific surrounding New Caledonia                                                                    | 6762   |
| CRED Towed-Diver Fish Biomass Surveys in the Pacific Ocean 2000-2010                                                                   | 5177   |
| Academy of Natural Sciences OBIS Mollusc Database                                                                                      | 4926   |
| Historical distribution of whales shown by logbook records 1785-1913                                                                   | 4120   |
| Ichtyologie                                                                                                                            | 3752   |
| Taiwan bottom trawl survey                                                                                                             | 3529   |
| obis_mbmcas_scs_i                                                                                                                      | 2860   |
| PANGAEA - Data from various sources                                                                                                    | 2694   |
| Bishop Museum Data (OBIS distribution)                                                                                                 | 2674   |
| obis_mbmcas_ys_i                                                                                                                       | 2562   |
| TOPP Summary of SSM-derived Telemetry                                                                                                  | 2412   |
| Arctic Species Trend Index (ASTI) : Marine                                                                                             | 2331   |
| obis_mbmcas_ys_ii                                                                                                                      | 2271   |
| BOLD Public Fish Data                                                                                                                  | 2097   |
| ECOCEAN Whale Shark Photo-identification Library                                                                                       | 2020   |
| Land-based observations of cetaceans in the waters of Beringa Island in 2007-2009                                                      | 1960   |
| CMarZ (Census of Marine Zooplankton)-Asia Database                                                                                     | 1892   |
| obis_mbmcas_scs_ii                                                                                                                     | 1846   |

|                                                                                                                                                 |      |
|-------------------------------------------------------------------------------------------------------------------------------------------------|------|
| IPHC seabird survey 2002-2011                                                                                                                   | 1680 |
| NaGISA Project                                                                                                                                  | 1639 |
| PANGAEA - data from Archive of Ocean Data (ArcOD)                                                                                               | 1588 |
| Type locality distributions from the World Register of Marine Species                                                                           | 1507 |
| SeamountsOnline (Seamount Biota)                                                                                                                | 1428 |
| Collection Bryozoa SMF                                                                                                                          | 1426 |
| PANGAEA - Data from marine animal ecology @ AWI                                                                                                 | 1271 |
| obis_iocas_ecs_i                                                                                                                                | 1211 |
| National Taiwan Museum                                                                                                                          | 1063 |
| IndOBIS, Indian Ocean Node of OBIS                                                                                                              | 1059 |
| obis_iocas_esc_ii                                                                                                                               | 1057 |
| Diversity and community structure of pelagic cnidarians in south-east Asian tropical marginal Seas                                              | 1010 |
| CeDAMar database for benthic biological sampling on the abyssal plains                                                                          | 967  |
| ZINRAS_Arctic_Benthos                                                                                                                           | 952  |
| Taxonomically comprehensive assessment of biodiversity of animal plankton throughout the world ocean                                            | 927  |
| Arctic Ostracode database 2010                                                                                                                  | 809  |
| NMFS Turtle Tracking (aggregated per 1-degree cell)                                                                                             | 737  |
| Cnidaria Anthozoa: Azooxanthellate Scleractinia from the Philippine and Indonesian regions                                                      | 716  |
| PANGAEA - Data from quaternary environment of the Eurasian North (QUEEN)                                                                        | 701  |
| Project for Reef Fish Monitoring                                                                                                                | 686  |
| Yangtze finless porpoise in Yangtze River, China 2006                                                                                           | 640  |
| asean_fish_occurrences_literature                                                                                                               | 630  |
| PANGAEA - Data from the Ocean Drilling Program (ODP)                                                                                            | 600  |
| Survey data of rocky shores on the Monitoring sites 1000 project, BDCJ                                                                          | 585  |
| JAMSTEC_MULTISPLASH2006_SagamiBay_Siphonophora                                                                                                  | 553  |
| MICROBIS database                                                                                                                               | 504  |
| South African Institute for Aquatic Biodiversity - Fish Collection                                                                              | 468  |
| Meiobenthos and nematodes from the continental shelf of the Laptev Sea                                                                          | 448  |
| CRED Rapid Ecological Assessments of Coral Health and Disease in the Pacific Ocean 2005-2008                                                    | 445  |
| Wildbook for Whale Sharks                                                                                                                       | 421  |
| Australian Institute of Marine Science for Zooplankton community structure in Nearshore waters of the Great Barrier Reef.                       | 397  |
| CephBase                                                                                                                                        | 392  |
| Senckenberg's collection management system                                                                                                      | 377  |
| Australian Institute of Marine Science - Surveys of Octocorals communities, benthic cover and environmental factors on coral reefs of Palau.    | 376  |
| Loggerhead turtle movement off the coast of Taiwan (aggregated per 1-degree cell)                                                               | 360  |
| iziko South African Museum - Shark Collection                                                                                                   | 351  |
| TOPP Albatrosses 2002-06 (aggregated per 1-degree cell)                                                                                         | 304  |
| Echinoderm collection                                                                                                                           | 274  |
| DFO Pacific IOS zooplankton database - Zooplankton samples collected during cruises to the Canadian Arctic between 1987 and 2000                | 265  |
| Fish Species Observed in the Hawaii Exclusive Economic Zone from the 1750s through 2003.                                                        | 252  |
| ChEssBase                                                                                                                                       | 242  |
| PANGAEA - Data from the Deep Sea Drilling Project (DSDP)                                                                                        | 235  |
| asean_fish_occurrences_museums                                                                                                                  | 209  |
| Ocean Genome Resource                                                                                                                           | 206  |
| Zoobenthos data from different sources (collected and extracted from literature), personal archive of G.V. Murina (IBSS)                        | 191  |
| Australian Institute of Marine Science - Surveys of Octocoral communities, benthic cover and environmental factors on coral reefs of Hong Kong. | 173  |
| Tern Island Albatrosses - 1999 (aggregated per 1-degree cell)                                                                                   | 160  |
| BOLD Marine Invertebrate Data                                                                                                                   | 159  |
| SWFSC juvenile loggerhead sea turtle tracking 2002-2005 (aggregated per 1-degree cell)                                                          | 153  |
| NPPSD Short-tailed Albatross Sightings                                                                                                          | 142  |

|                                                                                                                                                                                         |     |
|-----------------------------------------------------------------------------------------------------------------------------------------------------------------------------------------|-----|
| IndOBIS Dataset (36001-38000)                                                                                                                                                           | 140 |
| Nematodes of the central Arctic Ocean                                                                                                                                                   | 140 |
| Lamont-Doherty/LGL/NSF cruises                                                                                                                                                          | 121 |
| IndOBIS Dataset (34001-36000)                                                                                                                                                           | 117 |
| East London Museum                                                                                                                                                                      | 114 |
| Satellite telemetry of King Eiders from northern Alaska 2002-2009 (aggregated per 1-degree cell)                                                                                        | 114 |
| IndOBIS Dataset (32001-34000)                                                                                                                                                           | 113 |
| Distribution of small cetaceans in the nearshore waters of Sarawak, East Malaysia                                                                                                       | 112 |
| Cold water corals                                                                                                                                                                       | 107 |
| TOPP Fish (TOPP)                                                                                                                                                                        | 107 |
| Green sea turtle satellite tracking in the Nansha and Penghu Archipelagos 2000-2005 (aggregated per 1-degree cell)                                                                      | 106 |
| IndOBIS Dataset (14001-16000)                                                                                                                                                           | 106 |
| Tern Island Albatrosses - 1998 (aggregated per 1-degree cell)                                                                                                                           | 105 |
| Deep-sea Meiobenthos                                                                                                                                                                    | 96  |
| IndOBIS Dataset (12001-14000)                                                                                                                                                           | 96  |
| Collection Cnidaria SMF                                                                                                                                                                 | 95  |
| HMAP Dataset 21: Gulf of Thailand cephalopod fisheries                                                                                                                                  | 93  |
| Pacific Turtle Tracks: Grupo Tortuguero (aggregated per 1-degree cell)                                                                                                                  | 92  |
| Cetacean observations in the waters of Karaginsky Island and Beringa Island in 2009                                                                                                     | 78  |
| IndOBIS Dataset (16001-18000)                                                                                                                                                           | 65  |
| MV Ichthyology                                                                                                                                                                          | 62  |
| Vietnam Sea Turtle Tracking Project (aggregated per 1-degree cell)                                                                                                                      | 59  |
| Cetacean observations in Avacha Gulf 2005-2009                                                                                                                                          | 53  |
| Catalogue of Squat Lobsters                                                                                                                                                             | 51  |
| IndOBIS Dataset (6001-8000)                                                                                                                                                             | 50  |
| Northern Elephant Seals Post-Molting 2016 (aggregated per 1-degree cell)                                                                                                                | 48  |
| IndOBIS Dataset (30001-32000)                                                                                                                                                           | 46  |
| Satellite tracked green turtles in the South China Sea 1993-1994 (aggregated per 1-degree cell)                                                                                         | 46  |
| Circumpolar Seabird Monitoring Plan                                                                                                                                                     | 45  |
| Records from the NIWA AllSeaBio database                                                                                                                                                | 45  |
| Identification of Important Turtle Areas for green turtles in the Sulu Sulawesi Marine Ecoregion (aggregated per 1-degree cell)                                                         | 43  |
| IndOBIS Dataset (38001-40000)                                                                                                                                                           | 43  |
| IndOBIS Dataset (10001-12000)                                                                                                                                                           | 41  |
| IndOBIS Dataset (28001-30000)                                                                                                                                                           | 39  |
| Shallow-water fauna of Sagami Bay                                                                                                                                                       | 37  |
| IndOBIS Dataset (8001-10000)                                                                                                                                                            | 34  |
| Global distribution of Manta and Mobula rays - A citizen science project based upon a survey of divers                                                                                  | 33  |
| Cetacean survey in Balabac Strait, Philippines                                                                                                                                          | 32  |
| IndOBIS Dataset (4001-6000)                                                                                                                                                             | 30  |
| IndOBIS Dataset (18001-20000)                                                                                                                                                           | 29  |
| Northern elephant seals post-molting 2014 (aggregated per 1-degree cell)                                                                                                                | 26  |
| IndOBIS Dataset (20001-22000)                                                                                                                                                           | 25  |
| Continuous Plankton Recorder Dataset (SAHFOS) - Pacific Phytoplankton                                                                                                                   | 22  |
| iziko South African Museum - Fish Collection                                                                                                                                            | 22  |
| Naturalis National Natural History Museum (NL) - Crustacea Decapoda                                                                                                                     | 21  |
| IndOBIS Dataset                                                                                                                                                                         | 20  |
| CNMI Sea Turtle Program satellite tracked green turtles 2011 (aggregated per 1-degree cell)                                                                                             | 19  |
| Piai Island Green Sea Turtle Tracking (aggregated per 1-degree cell)                                                                                                                    | 19  |
| Cetacean observations in the Indian Ocean Sanctuary and the South China Sea, Mauritius to the Philippines, April 1999                                                                   | 18  |
| Sangalaki Green Turtles Tracking (aggregated per 1-degree cell)                                                                                                                         | 18  |
| Australian Institute of Marine Science - Bioresources Library                                                                                                                           | 17  |
| Holothuroidea distribution data from: Deep-sea fauna of European seas - an annotated species check-list of benthic invertebrates living deeper than 2000 m in the seas bordering Europe | 16  |

|                                                                                                                                                                                       |    |
|---------------------------------------------------------------------------------------------------------------------------------------------------------------------------------------|----|
| IPHC Opportunistic Albatross Obs 1998-2002                                                                                                                                            | 16 |
| MIRC Vessel Winter Surveys 2011                                                                                                                                                       | 16 |
| MV Marine Invertebrates                                                                                                                                                               | 16 |
| TOPP northern elephant seal ( <i>Mirounga angustirostris</i> ) ARGOS satellite tracking                                                                                               | 16 |
| ZooGene A DNA Sequence Database for Calanoid Copepods and Euphausiids                                                                                                                 | 16 |
| Scleractinia of Eastern Australia - AIMS Monograph Series - John (Charlie) Veron                                                                                                      | 15 |
| IndOBIS Dataset (24001-26000)                                                                                                                                                         | 13 |
| iziko South African Museum - Crustacean Collection                                                                                                                                    | 13 |
| IndOBIS Dataset (26001-28000)                                                                                                                                                         | 12 |
| Satellite Tracking of Hawksbill Turtles in Melaka, Malaysia (aggregated per 1-degree cell)                                                                                            | 12 |
| CRED REA Algal Quadrate Images in the Pacific Ocean 2002-2008                                                                                                                         | 11 |
| Distribution of Hydrothermal Alvinocaridid Shrimps                                                                                                                                    | 11 |
| Biocean                                                                                                                                                                               | 10 |
| Identification of secondary foraging grounds for green turtles as they depart Mantanani, Malaysia (aggregated per 1-degree cell)                                                      | 10 |
| IndOBIS Dataset (22001-24000)                                                                                                                                                         | 9  |
| IndOBIS Dataset (48001-50000)                                                                                                                                                         | 9  |
| IndOBIS Dataset (50001-52000)                                                                                                                                                         | 9  |
| MIRC Guam Marine Species Monitoring Winter-Spring Surveys 2012                                                                                                                        | 9  |
| South Western Pacific Regional OBIS Data Specify Subset                                                                                                                               | 9  |
| Collection Porifera SMF                                                                                                                                                               | 8  |
| MIRC Saipan Marine Species Monitoring Winter-Spring Surveys 2012                                                                                                                      | 8  |
| UK Royal Navy Marine Mammal Observations                                                                                                                                              | 8  |
| Biological observations from the Discovery Investigations 1925-1952                                                                                                                   | 7  |
| Catches or strandings of <i>Balaenoptera omurai</i>                                                                                                                                   | 7  |
| IndOBIS Dataset (90001-92000)                                                                                                                                                         | 7  |
| Extensive sympatry, cryptic diversity and introgression throughout the Indo-Pacific distribution of two coral species complexes                                                       | 6  |
| Naturalis Invertebrate specimens from marine expeditions                                                                                                                              | 6  |
| NMML 2002-2010 Bering Sea Shelf Cetacean Survey                                                                                                                                       | 6  |
| Ophiuroidea distribution data from: Deep-sea fauna of European seas - an annotated species check-list of benthic invertebrates living deeper than 2000 m in the seas bordering Europe | 6  |
| Palau Marine Turtle Conservation and Monitoring Program (aggregated per 1-degree cell)                                                                                                | 6  |
| Aerial sightings of beluga in the Russian Arctic seas 2010                                                                                                                            | 5  |
| Collection Polychaeta SMF                                                                                                                                                             | 5  |
| IndOBIS Dataset (40001-42000)                                                                                                                                                         | 5  |
| Taxonomic Information System for the Belgian coastal area                                                                                                                             | 5  |
| USAKA Turtle Release Program (aggregated per 1-degree cell)                                                                                                                           | 5  |
| Whimbrel Tracking in the Americas (aggregated per 1-degree cell)                                                                                                                      | 5  |
| Satellite tracking project, Pulau Banyak, Aceh, Sumatra, Indonesia (aggregated per 1-degree cell)                                                                                     | 4  |
| Satellite Tracking Project-Marinelife Alliance (aggregated per 1-degree cell)                                                                                                         | 4  |
| Australian Museum                                                                                                                                                                     | 3  |
| Marine apostome ciliates                                                                                                                                                              | 3  |
| Northern elephant seals post-molting 2015 MALES (aggregated per 1-degree cell)                                                                                                        | 3  |
| Tracking on Magnifying Olive ridley Journey in Kaironi beach, Papua-Indonesia (aggregated per 1-degree cell)                                                                          | 3  |
| Bryozoa distribution data from: Deep-sea fauna of European seas - an annotated species check-list of benthic invertebrates living deeper than 2000 m in the seas bordering Europe     | 2  |
| Collection Copepoda SMF                                                                                                                                                               | 2  |
| Crinoidea distribution data from: Deep-sea fauna of European seas - an annotated species check-list of benthic invertebrates living deeper than 2000 m in the seas bordering Europe   | 2  |
| Cascadia Research Blue Whale Photo IDs for US West Coast, 1972-2004                                                                                                                   | 1  |
| Cirripedia distribution data from: Deep-sea fauna of European seas - an annotated species check-list of benthic invertebrates living deeper than 2000 m in the seas bordering Europe  | 1  |
| Deep-Sea Hydrothermal Vent Endemic Brachyuran Family Bythograeidae                                                                                                                    | 1  |
| Derawan Green Turtles Tracking (aggregated per 1-degree cell)                                                                                                                         | 1  |

|                                                                                                                                                                                                    |   |
|----------------------------------------------------------------------------------------------------------------------------------------------------------------------------------------------------|---|
| Echinoidea distribution data from: Deep-sea fauna of European seas - an annotated species check-list of benthic invertebrates living deeper than 2000 m in the seas bordering Europe               | 1 |
| Ecsenius niue, new species of blenniid fish, and new distribution records for other species in the Opsifrontalis species group                                                                     | 1 |
| iziko South African Museum - Marine Mammal Collection                                                                                                                                              | 1 |
| iziko South African Museum - Mollusc Collection                                                                                                                                                    | 1 |
| Mysida and Lophogastrida distribution data from: Deep-sea fauna of European seas - an annotated species check-list of benthic invertebrates living deeper than 2000 m in the seas bordering Europe | 1 |
| Pycnogonida distribution data from: Deep-sea fauna of European seas - an annotated species check-list of benthic invertebrates living deeper than 2000 m in the seas bordering Europe              | 1 |
| SAM Herpetology                                                                                                                                                                                    | 1 |
| SOMBASE BIOCONSTRUCTORS                                                                                                                                                                            | 1 |
| The Azooxanthellate Scleractinia (Coelenterata: Anthozoa) of Australia                                                                                                                             | 1 |
| Tulane University Museum of Natural History                                                                                                                                                        | 1 |
| USGS Alaska Science Center Polar Bear Maternal Dens                                                                                                                                                | 1 |

---



## Supplementary Figures

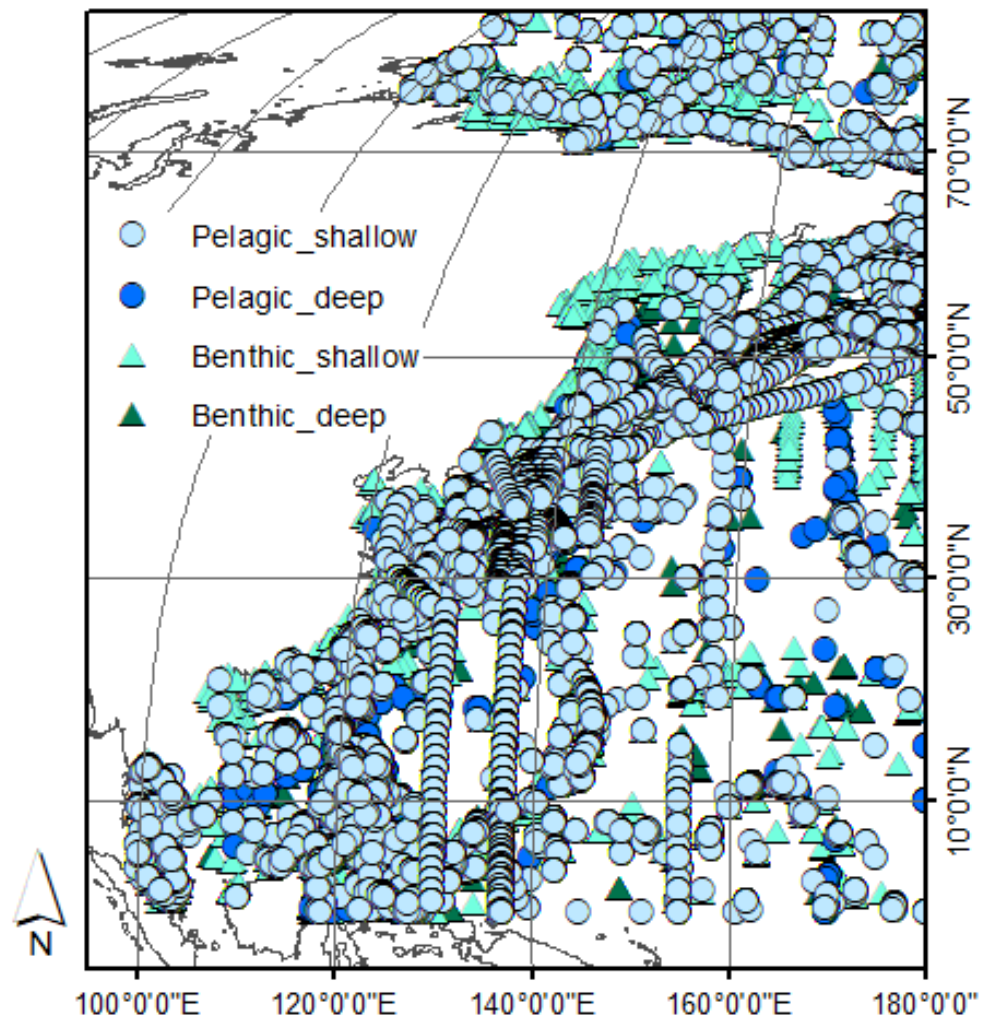

**Fig. S1.** Distribution map of pelagic and benthic shallow water (0-500m) and deep-sea (deeper than 500m) species in the NW Pacific and adjacent Arctic Ocean. In total 352,969 distribution records of four groups were mapped.

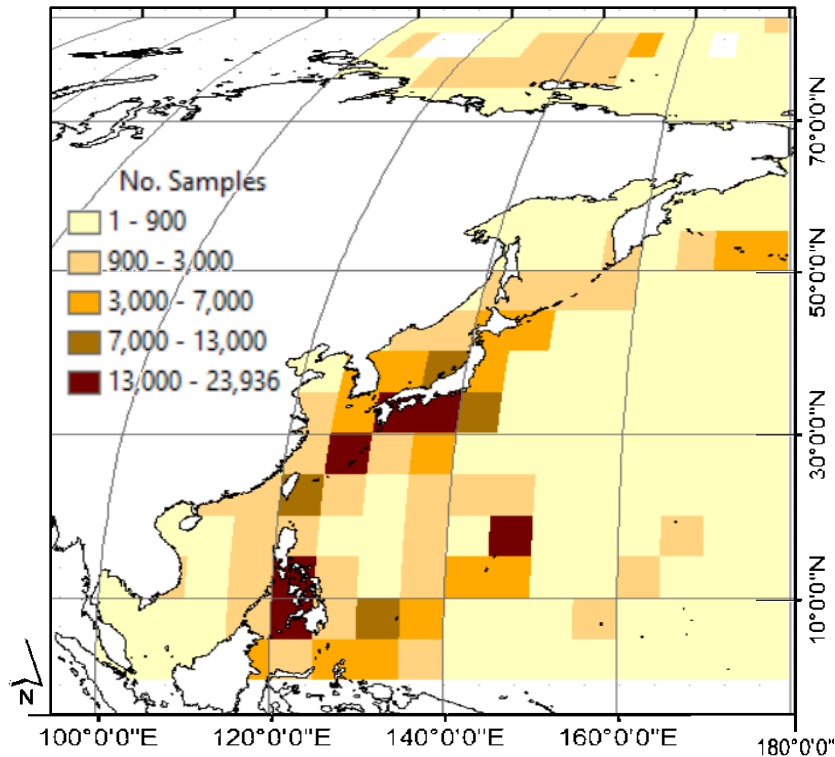

**Fig. S2.** Number of records in each 5°N latitude-longitude cell of the NW Pacific and adjacent Arctic Ocean. The Japan, East China, Philippine Seas had the highest number of records; from 13,000 to around 24,000 records.

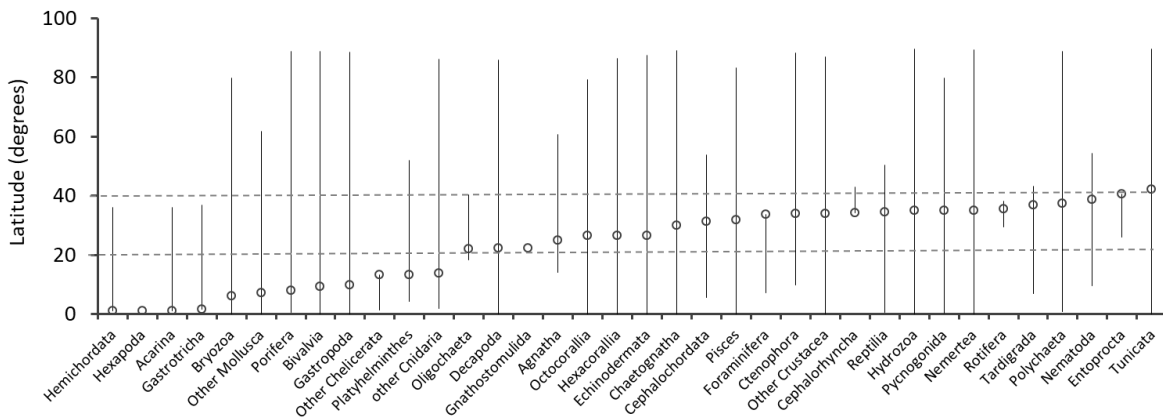

**Fig. S3.** Latitudinal ranges of higher taxa. The hollow circles show the mode of the distribution records, and indicator of sampling effort (not species richness), in each taxon.

### Shallow water (5°)

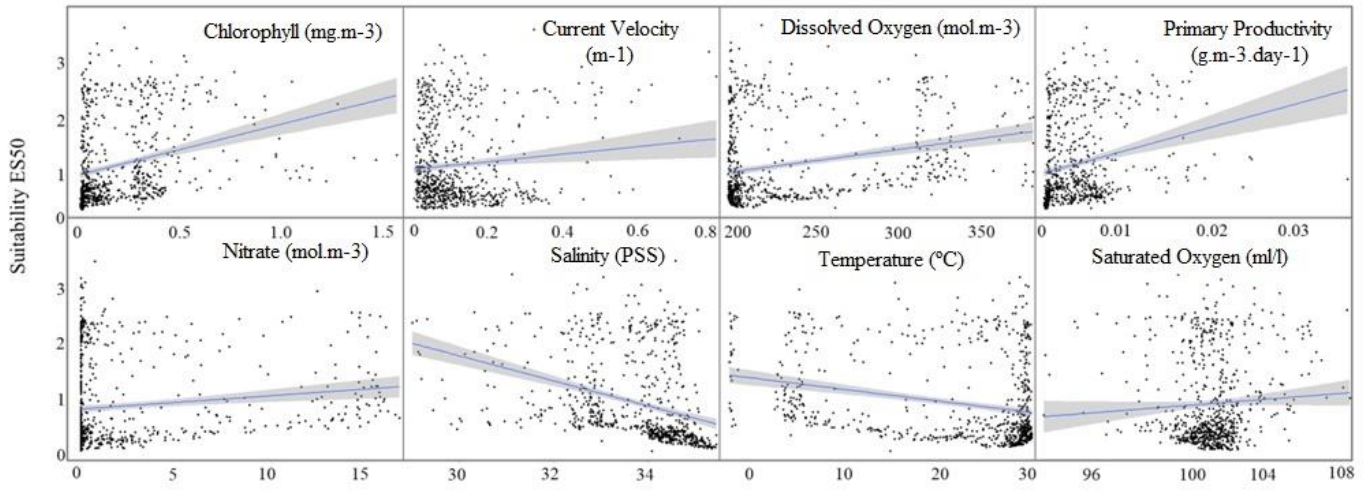

### Deep water (5°)

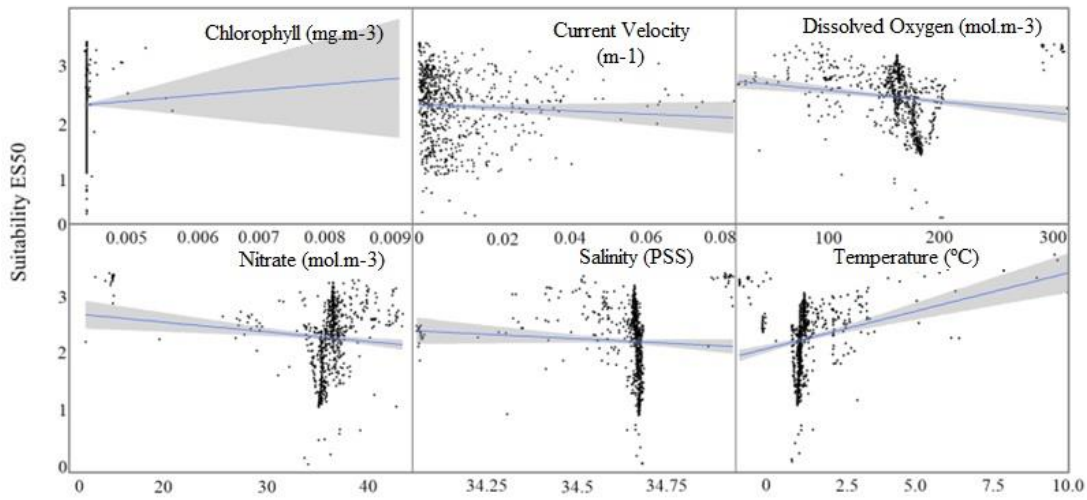

**Fig. S4.** Correlation matrix between suitability ES50 (suitable responses of ES50 to the environmental predictor variables) and environmental factors used in GAMs models for both shallow water (0-500 m) (top) and deep sea (>500 m) (bottom) species.



# GAMs for number of species, shallow water

We're going to develop a number of GAMs here. The "intercept" GAM represents the fit of a model that assumes no relationship between the species counts and the environment and no spatial autocorrelation. The "latlon" model represents the fit of a model that fits spatial autocorrelation, but no environmental effects. The "env" model represents the combined effects of all environmental predictors, and the remainder of the models ("temp", "oxygen", etc.) estimate the effects of a single predictor at a time.

```
shallow.numsp.intercept <- gam(num.species ~ 1, data = shallow, family = "nb", method = "REML", select = TRUE)
gam.check(shallow.numsp.intercept)
```

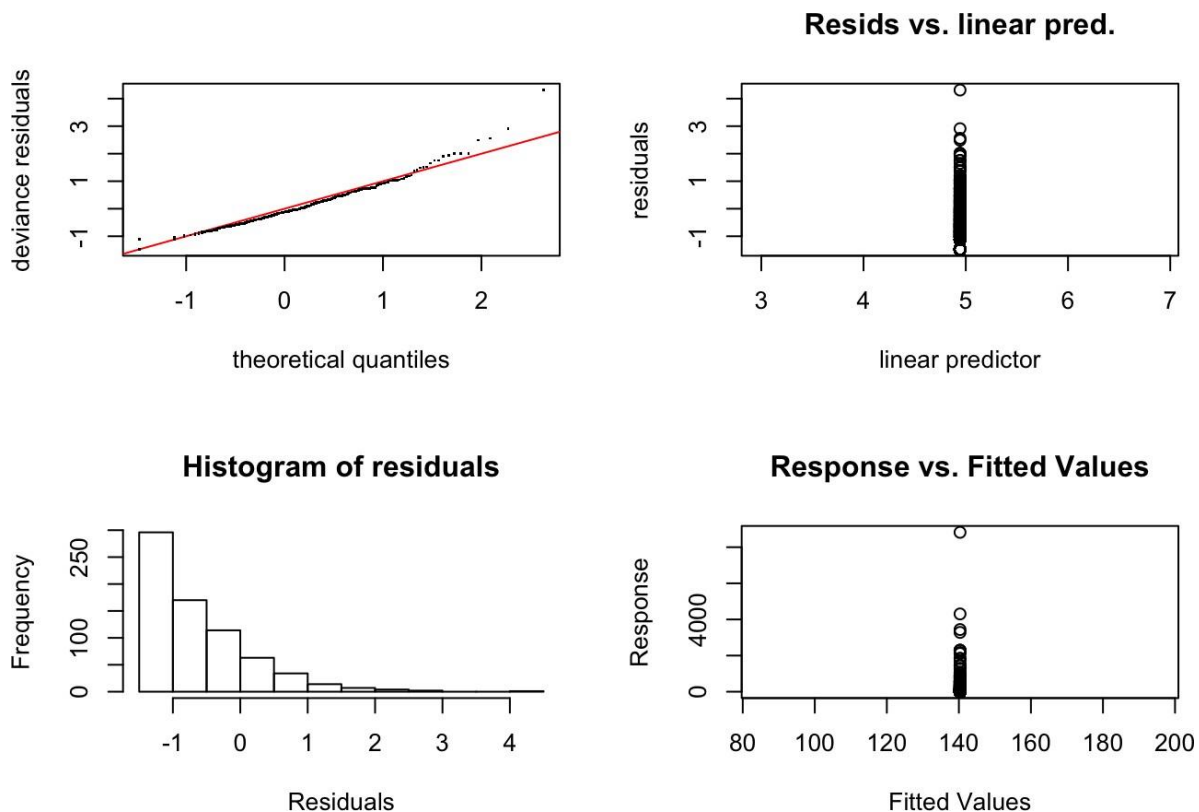

```
##
## Method: REML   Optimizer: outer newton
## full convergence after 5 iterations.
## Gradient range [2.33879e-06,2.33879e-06]
## (score 3116.071 & scale 1).
## Hessian positive definite, eigenvalue range [382.9675,382.9675].
## Model rank = 1 / 1
```

```
summary(shallow.numsp.intercept)
```

```
##
## Family: Negative Binomial(0.161)
## Link function: log
##
## Formula:
## num.species ~ 1
##
## Parametric coefficients:
##             Estimate Std. Error z value Pr(>|z|)
## (Intercept)  4.94395    0.09386   52.67  <2e-16 ***
## ---
## Signif. codes:  0 '***' 0.001 '**' 0.01 '*' 0.05 '.' 0.1 ' ' 1
##
## R-sq.(adj) =      0   Deviance explained = 1.56e-09%
## -REML = 3116.1   Scale est. = 1           n = 705
```

```
shallow.numsp.numrec <- gam(num.species ~ s(num.records), data = shallow, family =
"nb", method = "REML", select = TRUE)
gam.check(shallow.numsp.numrec)
```

**Resids vs. linear pred.**

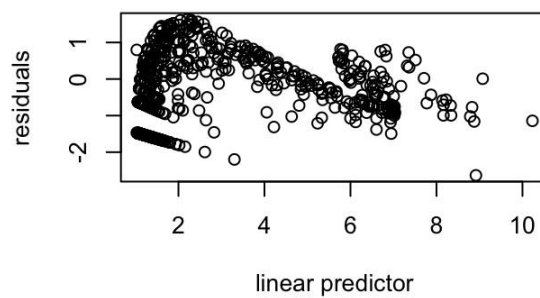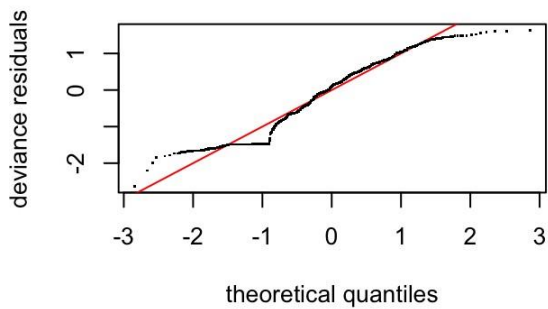

**Histogram of residuals**

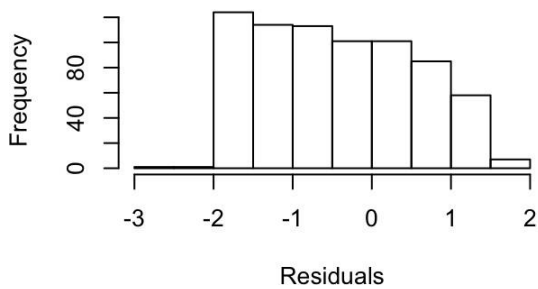

**Response vs. Fitted Values**

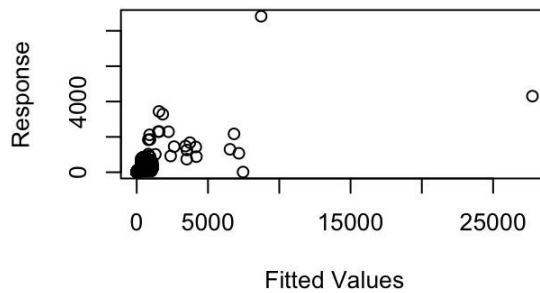

```
##
##Method:REML  Optimizer: outer newton
## full convergence after 9 iterations.
## Gradient range [-3.306909e-05,0.0006015526]
## (score 2711.477 & scale 1).
## Hessian positive definite, eigenvalue range [0.4966568,212.487].
## Model rank = 10 / 10
##
##Basis dimension (k) checking results. Low p-value (k-index<1) may
## indicate that k is too low, especially if edf is close to k'.
##
##              k'  edf k-index p-value
## s(num.records) 9.00 8.86   0.43 <2e-16 ***
## ---
## Signif. codes:  0 '***' 0.001 '**' 0.01 '*' 0.05 '.' 0.1 ' ' 1
```

```
summary(shallow.numsp.numrec)
```

```
##
## Family: Negative Binomial(0.641)
## Link function: log
##
## Formula:
## num.species ~ s(num.records)
##
## Parametric coefficients:
##              Estimate Std. Error z value Pr(>|z|)
## (Intercept)  2.75008    0.04959   55.46  <2e-16 ***
## ---
## Signif. codes:  0 '***' 0.001 '**' 0.01 '*' 0.05 '.' 0.1 ' ' 1
##
## Approximate significance of smooth terms:
##              edf Ref.df Chi.sq p-value
## s(num.records) 8.855      9  1964 <2e-16 ***
## ---
## Signif. codes:  0 '***' 0.001 '**' 0.01 '*' 0.05 '.' 0.1 ' ' 1
##
## R-sq.(adj) =  -3.39   Deviance explained =  71%
## -REML=2711.5Scale est. = 1             n = 705
```

```
shallow.numsp.latlon <- gam(num.species ~ s(lat, lon, bs = "sos") + s(num.records), data =
shallow, family = "nb", method = "REML", select = TRUE)
gam.check(shallow.numsp.latlon)
```

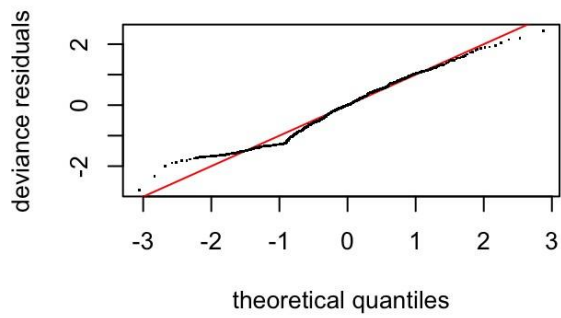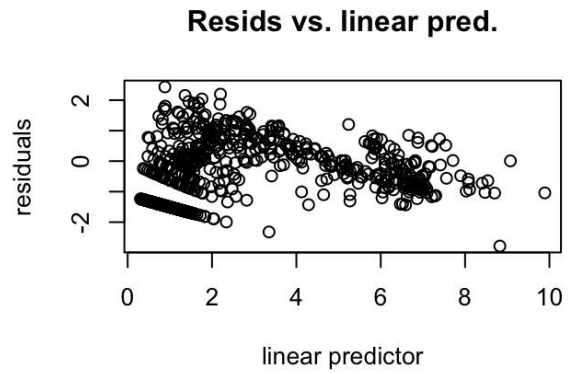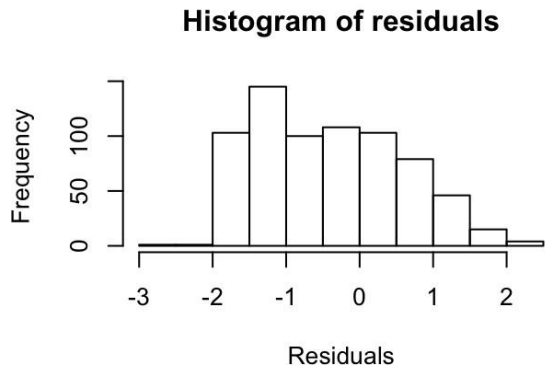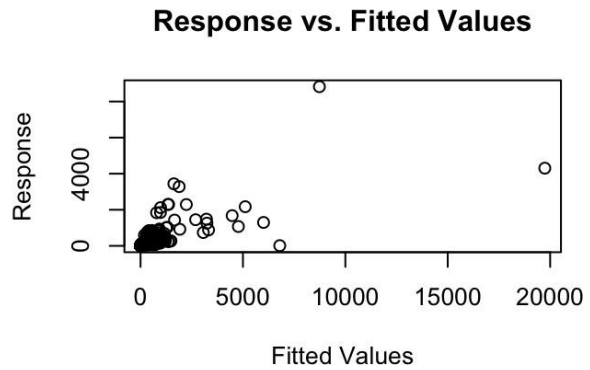

```
##
## Method: REML  Optimizer: outer newton
## full convergence after 12 iterations.
## Gradient range [-9.356918e-05,0.001657861]
## (score 2690.814 & scale 1).
## Hessian positive definite, eigenvalue range [0.4975741,193.3047].
## Model rank =  59 / 59
##
## Basis dimension (k) checking results. Low p-value (k-index<1) may
## indicate that k is too low, especially if edf is close to k'.
##
##           k'   edf k-index p-value
## s(lat,lon) 49.00 12.82  0.74 <2e-16 ***
## s(num.records) 9.00  8.84  0.48 <2e-16 ***
## ---
## Signif. codes:  0 '***' 0.001 '**' 0.01 '*' 0.05 '.' 0.1 ' ' 1
```

```
summary(shallow.numsp.latlon)
```



```
##
## Family: Negative Binomial(0.73)
## Link function: log
##
## Formula:
## num.species ~ s(lat, lon, bs = "sos") + s(num.records)
##
## Parametric coefficients:
##             Estimate Std. Error z value Pr(>|z|)
## (Intercept)  2.6640    0.0474   56.2 <2e-16 ***
## ---
## Signif. codes:  0 '***' 0.001 '**' 0.01 '*' 0.05 '.' 0.1 ' ' 1
##
## Approximate significance of smooth terms:
##             edf Ref.df  Chi.sq  p-value
## s(lat,lon)   12.824   49  66.67 1.85e-12 ***
## s(num.records) 8.844    9 1474.16 < 2e-16 ***
## ---
## Signif. codes:  0 '***' 0.001 '**' 0.01 '*' 0.05 '.' 0.1 ' ' 1
##
## R-sq.(adj) = -1.26   Deviance explained = 74.5%
## -REML=2690.8Scale est. = 1           n = 705
```

```
shallow.numsp.temp <- gam(num.species ~ s(lat, lon, bs = "sos") + s(num.records) +
s(temp), data = shallow, family = "nb", method = "REML", select = TRUE)
gam.check(shallow.numsp.temp)
```

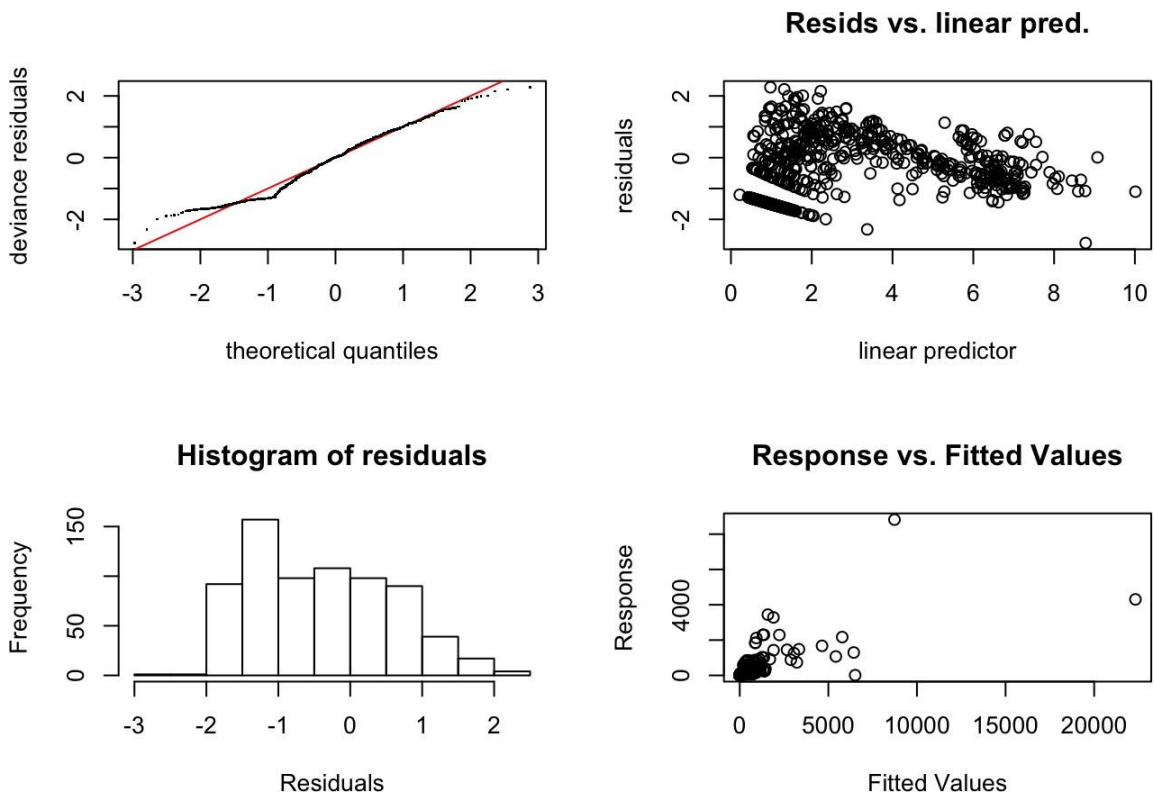

```
##
## Method: REML   Optimizer: outer newton
## full convergence after 12 iterations.
## Gradient range [-9.719285e-05,0.0007917026]
## (score 2689.112 & scale 1).
## Hessian positive definite, eigenvalue range [9.717277e-05,195.1371].
## Model rank = 68 / 68
##
## Basis dimension (k) checking results. Low p-value (k-index<1) may
## indicate that k is too low, especially if edf is close to k'.
##
##           k'   edf k-index p-value
## s(lat,lon)  49.00  7.53   0.74 <2e-16 ***
## s(num.records) 9.00  8.84   0.48 <2e-16 ***
## s(temp)      9.00  2.15   0.89   0.88
## ---
## Signif. codes:  0 '***' 0.001 '**' 0.01 '*' 0.05 '.' 0.1 ' ' 1
```

```
summary(shallow.numsp.temp)
```

```
##
## Family: Negative Binomial(0.727)
## Link function: log
##
## Formula:
## num.species ~ s(lat, lon, bs = "sos") + s(num.records) + s(temp)
##
## Parametric coefficients:
##           Estimate Std. Error z value Pr(>|z|)
## (Intercept)  2.67036    0.04745   56.28 <2e-16 ***
## ---
## Signif. codes:  0 '***' 0.001 '**' 0.01 '*' 0.05 '.' 0.1 ' ' 1
##
## Approximate significance of smooth terms:
##           edf Ref.df   Chi.sq p-value
## s(lat,lon)   7.533    49  34.065 6.73e-08 ***
## s(num.records) 8.840     9 1555.054 < 2e-16 ***
## s(temp)      2.147     9   9.394 2.54e-05 ***
## ---
## Signif. codes:  0 '***' 0.001 '**' 0.01 '*' 0.05 '.' 0.1 ' ' 1
##
## R-sq.(adj) = -1.82   Deviance explained = 74.2%
## -REML=2689.1 Scale est. = 1           n = 705
```

```
shallow.numsp.oxygen <- gam(num.species ~ s(lat, lon, bs = "sos") + s(num.records)
+ s(dissolved.oxygen), data = shallow, family = "nb", method = "REML", select = T
RUE)
gam.check(shallow.numsp.oxygen)
```

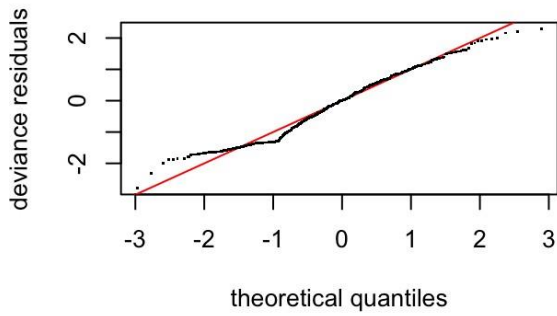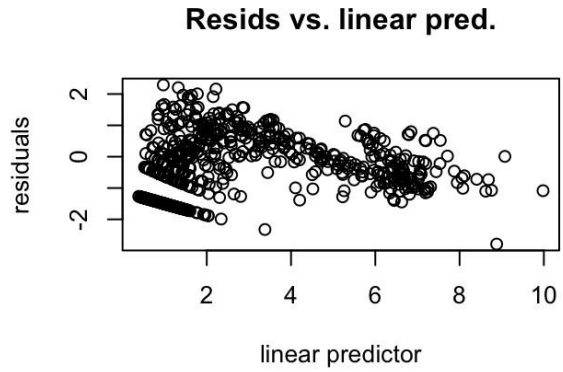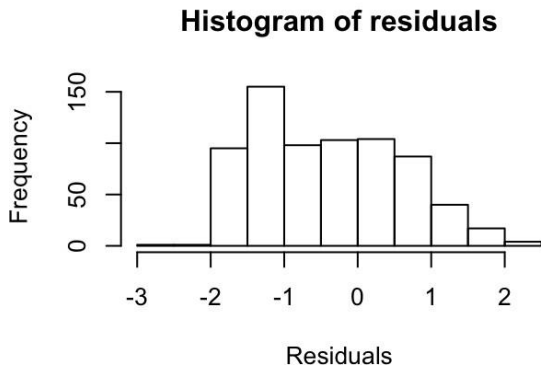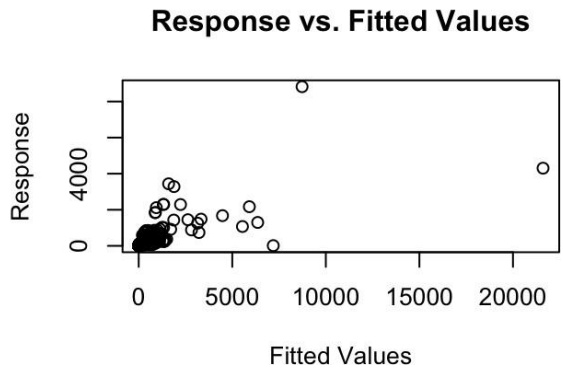

```
##
## Method: REML   Optimizer: outer newton
## full convergence after 17 iterations.
## Gradient range [-0.0001833293,0.001605755]
## (score 2689.23 & scale 1).
## Hessian positive definite, eigenvalue range [0.0001832544,195.7092].
## Model rank = 68 / 68
##
## Basis dimension (k) checking results. Low p-value (k-index<1) may
## indicate that k is too low, especially if edf is close to k'.
##
##           k'   edf k-index p-value
## s(lat,lon)   49.00 7.40   0.74  0.005 **
## s(num.records) 9.00 8.84   0.48 <2e-16 ***
## s(dissolved.oxygen) 9.00 1.98   0.84  0.495
## ---
## Signif. codes:  0 '***' 0.001 '**' 0.01 '*' 0.05 '.' 0.1 ' ' 1
```

```
summary(shallow.numsp.oxygen)
```

```
##
## Family: Negative Binomial(0.725)
## Link function: log
##
## Formula:
## num.species ~ s(lat, lon, bs = "sos") + s(num.records) + s(dissolved.oxygen)
##
## Parametric coefficients:
##              Estimate Std. Error z value Pr(>|z|)
## (Intercept)  2.6720    0.0475   56.26 <2e-16 ***
## ---
## Signif. codes:  0 '***' 0.001 '**' 0.01 '*' 0.05 '.' 0.1 ' ' 1
##
## Approximate significance of smooth terms:
##              edf Ref.df  Chi.sq p-value
## s(lat,lon)      7.395   49  34.122 5.08e-08 ***
## s(num.records)  8.839    9 1554.175 < 2e-16 ***
## s(dissolved.oxygen) 1.977    9   9.037 2.38e-05 ***
## ---
## Signif. codes:  0 '***' 0.001 '**' 0.01 '*' 0.05 '.' 0.1 ' ' 1
##
## R-sq.(adj) = -1.72  Deviance explained = 74.2%
## -REML=2689.2Scale est. = 1          n = 705
```

```
shallow.numsp.prod <- gam(num.species ~ s(lat, lon, bs = "sos") + s(num.records) +
s(primary.productivity), data = shallow, family = "nb", method = "REML", select = T
RUE)
gam.check(shallow.numsp.prod)
```

**Resids vs. linear pred.**

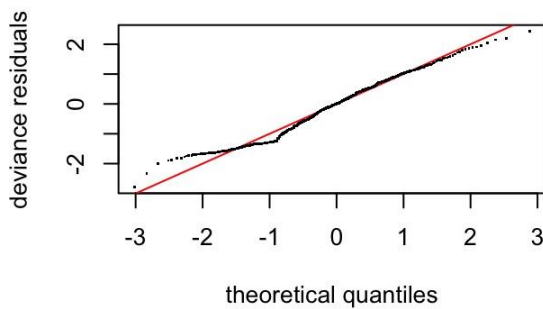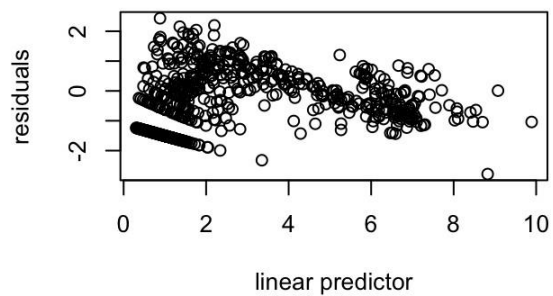

**Histogram of residuals**

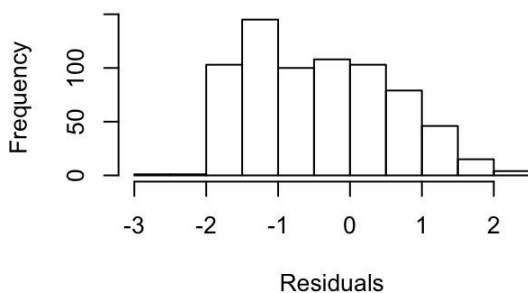

**Response vs. Fitted Values**

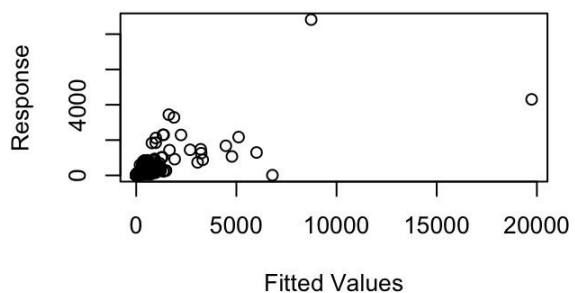

```
##
##Method:REML Optimizer: outer newton
## full convergence after 17 iterations.
## Gradient range [-0.0002133841,0.001419792]
## (score 2690.815 & scale 1).
## Hessian positive definite, eigenvalue range [0.0001387295,193.3042].
## Modelrank = 68 / 68
##
##Basis dimension (k) checking results. Low p-value (k-index<1) may
## indicate that k is too low, especially if edf is close to k'.
##
##
##          k'      edf k-index p-value
## s(lat,lon)      49.00000 12.82396    0.74 <2e-16 ***
## s(num.records)   9.00000  8.84415    0.48 <2e-16 ***
## s(primary.productivity) 9.00000  0.00125    0.83  0.31
## ---
## Signif. codes:  0 '***' 0.001 '**' 0.01 '*' 0.05 '.' 0.1 ' ' 1
```

```
summary(shallow.numsp.prod)
```

```
##
## Family: Negative Binomial(0.73)
## Link function: log
##
## Formula:
## num.species ~ s(lat, lon, bs = "sos") + s(num.records) + s(primary.productivity)
##
## Parametric coefficients:
##              Estimate Std. Error z value Pr(>|z|)
## (Intercept)  2.6640     0.0474   56.2    <2e-16 ***
## ---
## Signif. codes:  0 '***' 0.001 '**' 0.01 '*' 0.05 '.' 0.1 ' ' 1
##
## Approximate significance of smooth terms:
##              edf Ref.df   Chi.sq  p-value
## s(lat,lon)      12.823963     49   66.663 1.85e-12 ***
## s(num.records)   8.844153      9 1474.147 < 2e-16 ***
## s(primary.productivity) 0.001252      9    0.001  0.424
## ---
## Signif. codes:  0 '***' 0.001 '**' 0.01 '*' 0.05 '.' 0.1 ' ' 1
##
## R-sq.(adj) = -1.26 Deviance explained = 74.5%
## -REML= 2690.8 Scale est. = 1 n = 705
```

```
shallow.numsp.chlorophyll <- gam(num.species ~ s(lat, lon, bs = "sos") + s(num.records)
+ s(chlorophyll), data = shallow, family = "nb", method = "REML", select = TRUE)
gam.check(shallow.numsp.chlorophyll)
```

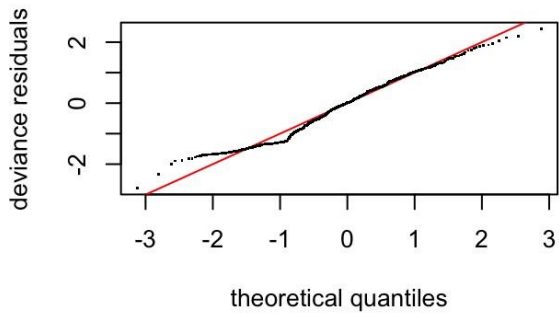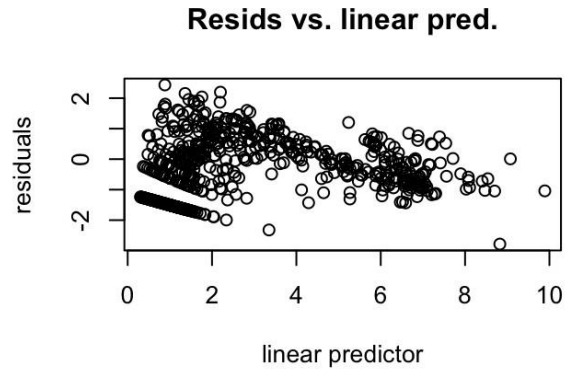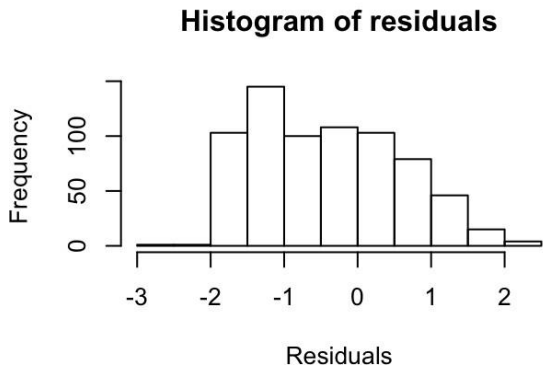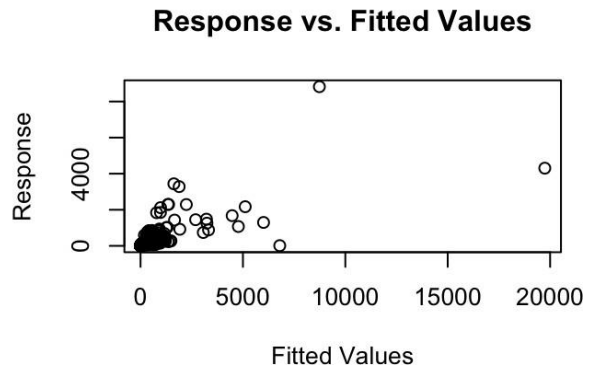

```
##
## Method: REML   Optimizer: outer newton
## full convergence after 17 iterations.
## Gradient range [-0.0001761506,0.0009546675]
## (score 2690.814 & scale 1).
## Hessian positive definite, eigenvalue range [0.0001271656,193.3044].
## Model rank = 68 / 68
##
## Basis dimension (k) checking results. Low p-value (k-index<1) may
## indicate that k is too low, especially if edf is close to k'.
##
##           k'      edf k-index p-value
## s(lat,lon) 49.00000 12.82359  0.74 <2e-16 ***
## s(num.records) 9.00000  8.84416  0.48 <2e-16 ***
## s(chlorophyll) 9.00000  0.00143  0.79  0.05 *
## ---
## Signif. codes:  0 '***' 0.001 '**' 0.01 '*' 0.05 '.' 0.1 ' ' 1
```

```
summary(shallow.numsp.chlorophyll)
```

```
##
## Family: Negative Binomial(0.73)
## Link function: log
##
## Formula:
## num.species ~ s(lat, lon, bs = "sos") + s(num.records) + s(chlorophyll)
##
## Parametric coefficients:
##              Estimate Std. Error z value Pr(>|z|)
## (Intercept)  2.6640     0.0474   56.2 <2e-16 ***
## ---
## Signif. codes:  0 '***' 0.001 '**' 0.01 '*' 0.05 '.' 0.1 ' ' 1
##
## Approximate significance of smooth terms:
##              edf Ref.df  Chi.sq p-value
## s(lat,lon)    12.823594    49  66.641 1.86e-12 ***
## s(num.records) 8.844155     9 1474.164 < 2e-16 ***
## s(chlorophyll) 0.001435     9   0.001  0.375
## ---
## Signif. codes:  0 '***' 0.001 '**' 0.01 '*' 0.05 '.' 0.1 ' ' 1
##
## R-sq.(adj) = -1.26  Deviance explained = 74.5%
## -REML= 2690.8 Scale est. = 1          n = 705
```

```
shallow.numsp.current <- gam(num.species ~ s(lat, lon, bs = "sos") + s(num.records)
+ s(current), data = shallow, family = "nb", method = "REML", select = TRUE)
gam.check(shallow.numsp.current)
```

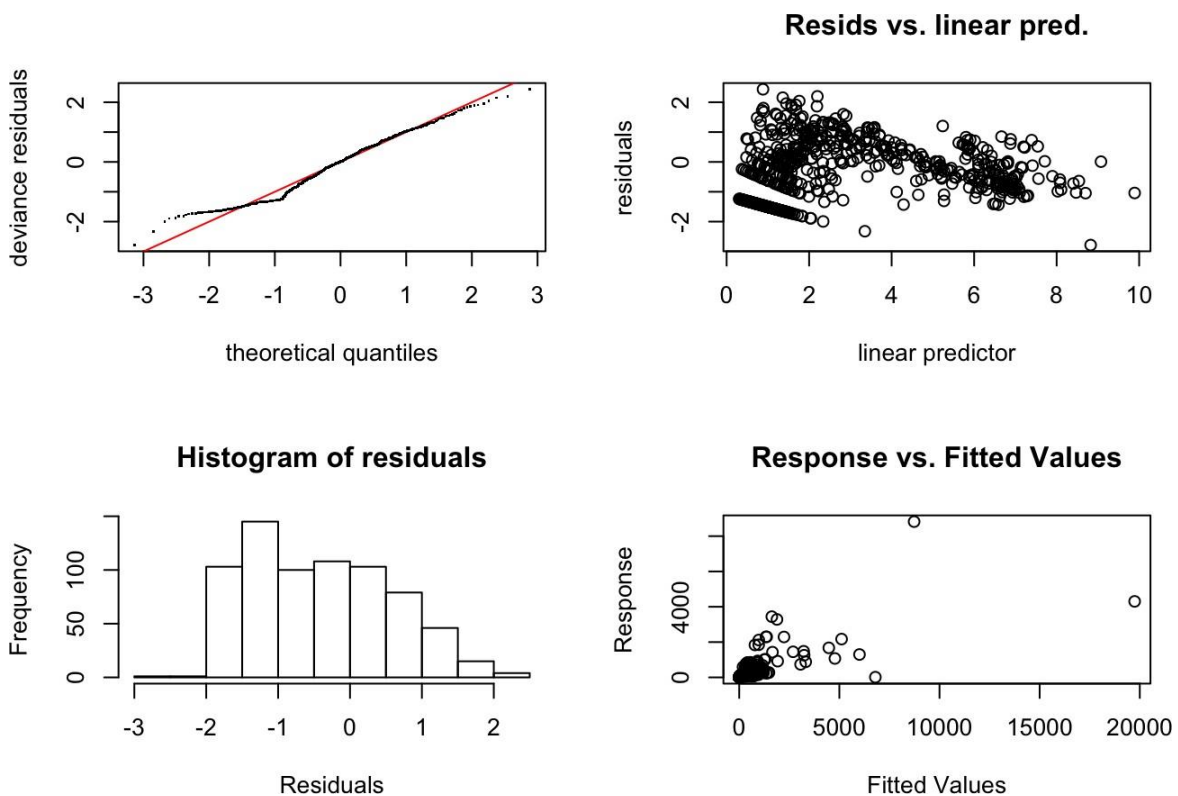

```
##
##Method:REML  Optimizer: outer newton
## full convergence after 12 iterations.
## Gradient range [-0.0002338866,0.001733544]
## (score 2690.815 & scale 1).
## Hessian positive definite, eigenvalue range [0.0001043007,193.3042].
## Modelrank = 68 / 68
##
##Basis dimension (k) checking results. Low p-value (k-index<1) may
## indicate that k is too low, especially if edf is close to k'.
##
##              k'      edf k-index p-value
## s(lat,lon)    49.00000 12.82367   0.74 <2e-16 ***
## s(num.records) 9.00000  8.84415   0.48 <2e-16 ***
## s(current)    9.00000  0.00189   0.88   0.82
## ---
## Signif. codes:  0 '***' 0.001 '**' 0.01 '*' 0.05 '.' 0.1 ' ' 1
```

```
summary(shallow.numsp.current)
```

```
##
## Family: Negative Binomial(0.73)
## Link function: log
##
## Formula:
## num.species ~ s(lat, lon, bs = "sos") + s(num.records) + s(current)
##
## Parametric coefficients:
##              Estimate Std. Error z value Pr(>|z|)
## (Intercept)  2.6640     0.0474   56.2   <2e-16 ***
## ---
## Signif. codes:  0 '***' 0.001 '**' 0.01 '*' 0.05 '.' 0.1 ' ' 1
##
## Approximate significance of smooth terms:
##              edf Ref.df  Chi.sq p-value
## s(lat,lon)    12.823667    49  66.655 1.86e-12 ***
## s(num.records) 8.844152     9 1474.107 < 2e-16 ***
## s(current)    0.001885     9   0.001  0.517
## ---
## Signif. codes:  0 '***' 0.001 '**' 0.01 '*' 0.05 '.' 0.1 ' ' 1
##
## R-sq.(adj) = -1.26  Deviance explained = 74.5%
## -REML= 2690.8 Scale est. = 1          n = 705
```

```
shallow.numsp.o2.saturnate <- gam(num.species ~ s(lat, lon, bs = "sos") + s(num.reco rds)
+ s(o2.saturnate), data = shallow, family = "nb", method = "REML", select = TRUE)
gam.check(shallow.numsp.o2.saturnate)
```



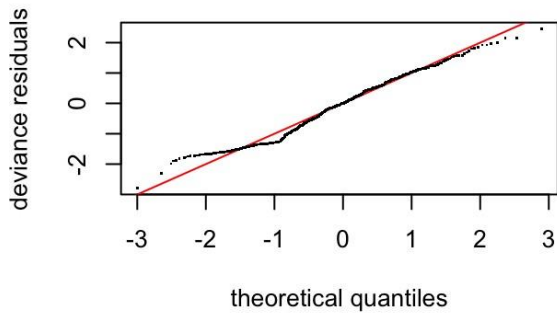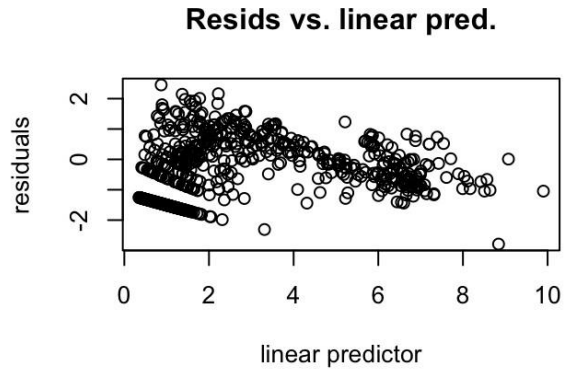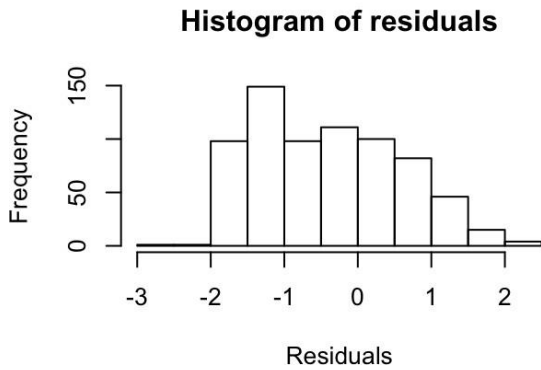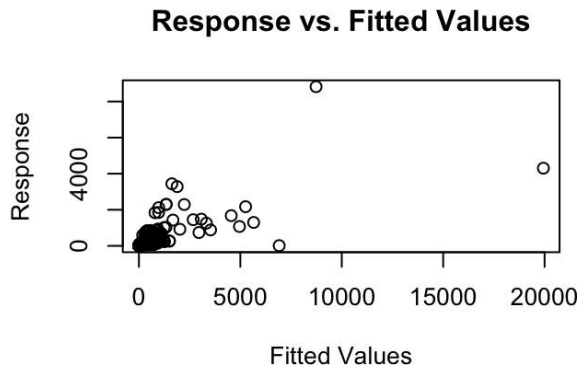

```
##
## Method: REML  Optimizer: outer newton
## full convergence after 12 iterations.
## Gradient range [-0.0001888787,0.001738329]
## (score 2690.688 & scale 1).
## Hessian positive definite, eigenvalue range [0.0001887718,193.1974].
## Model rank = 68 / 68
##
## Basis dimension (k) checking results. Low p-value (k-index<1) may
## indicate that k is too low, especially if edf is close to k'.
##
##           k'    edf k-index p-value
## s(lat,lon) 49.000 12.358  0.74 <2e-16 ***
## s(num.records) 9.000  8.844  0.48 <2e-16 ***
## s(o2.saturate) 9.000  0.617  0.86  0.65
## ---
## Signif. codes:  0 '***' 0.001 '**' 0.01 '*' 0.05 '.' 0.1 ' ' 1
```

```
summary(shallow.numsp.o2.saturate)
```

```
##
## Family: Negative Binomial(0.73)
## Link function: log
##
## Formula:
## num.species ~ s(lat, lon, bs = "sos") + s(num.records) + s(o2.saturate)
##
## Parametric coefficients:
##             Estimate Std. Error z value Pr(>|z|)
## (Intercept)  2.66391    0.04739   56.21  <2e-16 ***
## ---
## Signif. codes:  0 '***' 0.001 '**' 0.01 '*' 0.05 '.' 0.1 ' ' 1
##
## Approximate significance of smooth terms:
##             edf Ref.df   Chi.sq p-value
## s(lat,lon)    12.3585    49  63.474 3.3e-12 ***
## s(num.records)  8.8438     9 1480.231 < 2e-16 ***
## s(o2.saturate)  0.6173     9   1.012   0.15
## ---
## Signif. codes:  0 '***' 0.001 '**' 0.01 '*' 0.05 '.' 0.1 ' ' 1
##
## R-sq.(adj) =  -1.31   Deviance explained = 74.5%
## -REML= 2690.7 Scale est. = 1           n = 705
```

```
shallow.numsp.salinity <- gam(num.species ~ s(lat, lon, bs = "sos") + s(num.record
s) + s(salinity), data = shallow, family = "nb", method = "REML", select = TRUE)
gam.check(shallow.numsp.salinity)
```

**Resids vs. linear pred.**

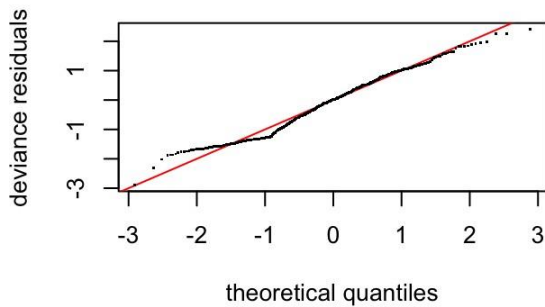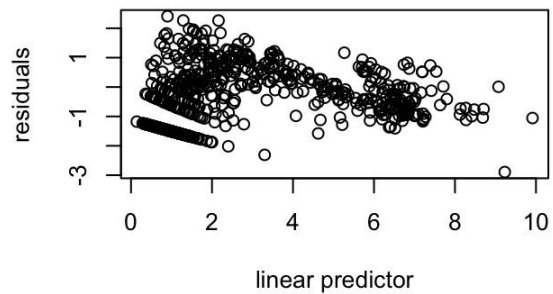

**Histogram of residuals**

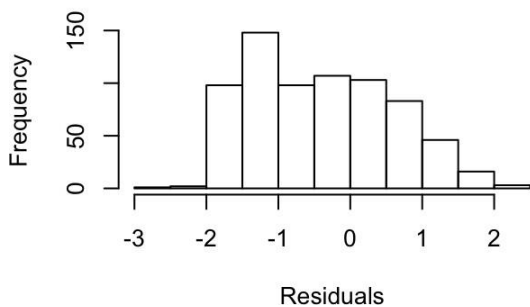

**Response vs. Fitted Values**

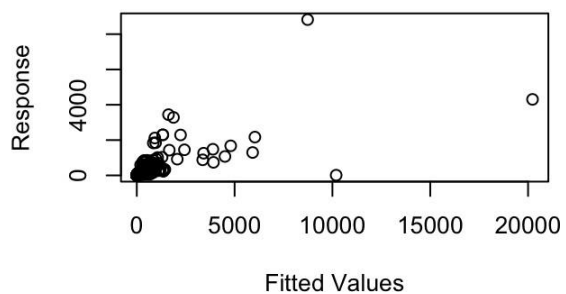

```
##
## Method: REML   Optimizer: outer newton
## full convergence after 12 iterations.
## Gradient range [-0.0001653638,0.001587915]
## (score 2689.424 & scale 1).
## Hessian positive definite, eigenvalue range[0.002622196,193.1189].
## Model rank = 68 / 68
##
## Basis dimension (k) checking results. Low p-value (k-index<1) may
## indicate that k is too low, especially if edf is close to k'.
##
##           k'   edf k-index p-value
## s(lat,lon)  49.00 10.73   0.75 <2e-16 ***
## s(num.records) 9.00  8.84   0.48 <2e-16 ***
## s(salinity)  9.00  1.72   0.82    0.1
## ---
## Signif. codes:  0 '***' 0.001 '**' 0.01 '*' 0.05 '.' 0.1 ' ' 1
```

```
summary(shallow.numsp.salinity)
```

```
##
## Family: Negative Binomial(0.732)
## Link function: log
##
## Formula:
## num.species ~ s(lat, lon, bs = "sos") + s(num.records) + s(salinity)
##
## Parametric coefficients:
##           Estimate Std. Error z value Pr(>|z|)
## (Intercept) 2.66279   0.04735  56.23 <2e-16 ***
## ---
## Signif. codes:  0 '***' 0.001 '**' 0.01 '*' 0.05 '.' 0.1 ' ' 1
##
## Approximate significance of smooth terms:
##           edf Ref.df  Chi.sq p-value
## s(lat,lon)  10.728   49  28.168 0.000165 ***
## s(num.records) 8.843    9 1493.268 < 2e-16 ***
## s(salinity)  1.716    9   6.143 0.004691 **
## ---
## Signif. codes:  0 '***' 0.001 '**' 0.01 '*' 0.05 '.' 0.1 ' ' 1
##
## R-sq.(adj) = -1.76   Deviance explained = 74.5%
## -REML= 2689.4 Scale est. = 1           n = 705
```

```
shallow.numsp.nitrate <- gam(num.species ~ s(lat, lon, bs = "sos") + s(num.records)
+ s(nitrate), data = shallow, family = "nb", method = "REML", select = TRUE)
gam.check(shallow.numsp.nitrate)
```

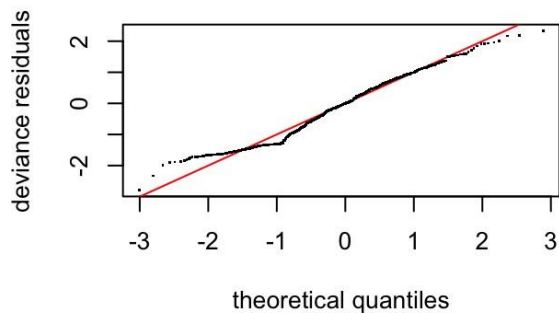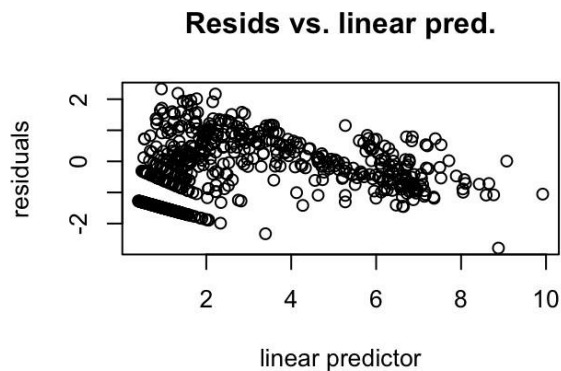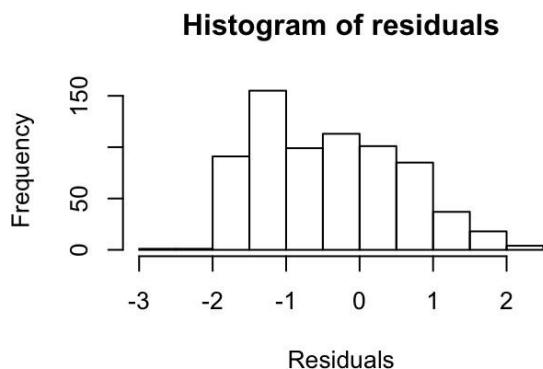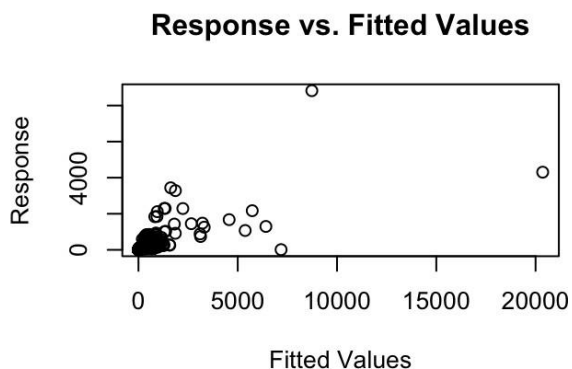

```
##
## Method: REML   Optimizer: outer newton
## full convergence after 12 iterations.
## Gradient range [-0.0001123949,0.001608861]
## (score 2689.498 & scale 1).
## Hessian positive definite, eigenvalue range [0.0001123446,195.7503].
## Model rank = 68 / 68
##
## Basis dimension (k) checking results. Low p-value (k-index<1) may
## indicate that k is too low, especially if edf is close to k'.
##
##           k'   edf k-index p-value
## s(lat,lon) 49.00 8.68  0.74 <2e-16 ***
## s(num.records) 9.00 8.84  0.48 <2e-16 ***
## s(nitrate)  9.00 1.44  0.81  0.08 .
## ---
## Signif. codes:  0 '***' 0.001 '**' 0.01 '*' 0.05 '.' 0.1 ' ' 1
```

```
summary(shallow.numsp.nitrate)
```

```
##
## Family: Negative Binomial(0.725)
## Link function: log
##
## Formula:
## num.species ~ s(lat, lon, bs = "sos") + s(num.records) + s(nitrate)
##
## Parametric coefficients:
##             Estimate Std. Error z value Pr(>|z|)
## (Intercept)  2.67060   0.04751  56.21 <2e-16 ***
## ---
## Signif. codes:  0 '****' 0.001 '***' 0.01 '**' 0.05 '.' 0.1 ' ' 1
##
## Approximate significance of smooth terms:
##             edf Ref.df  Chi.sq p-value
## s(lat,lon)   8.683   49  42.889 3.87e-09 ***
## s(num.records) 8.844    9 1554.037 < 2e-16 ***
## s(nitrate)   1.442    9   6.317  0.0026 **
## ---
## Signif. codes:  0 '****' 0.001 '***' 0.01 '**' 0.05 '.' 0.1 ' ' 1
##
## R-sq.(adj) =  -1.48   Deviance explained = 74.2%
## -REML= 2689.5 Scale est. = 1           n = 705
```

```
shallow.numsp.env <- gam(num.species ~ s(lat, lon, bs = "sos") + s(num.records) + s
(temp) + s(dissolved.oxygen) + s(primary.productivity) + s(chlorophyll) + s(curren
t) + s(o2.saturnate) + s(salinity) + s(nitrate), data = shallow, family = "nb", meth od =
"REML", select = TRUE)
gam.check(shallow.numsp.env)
```

**Resids vs. linear pred.**

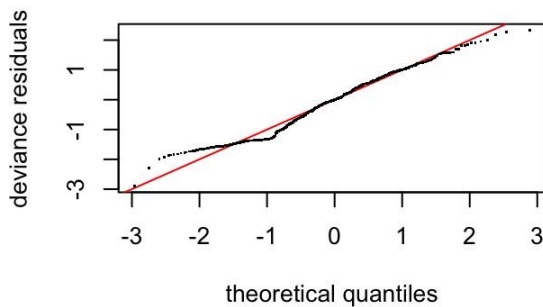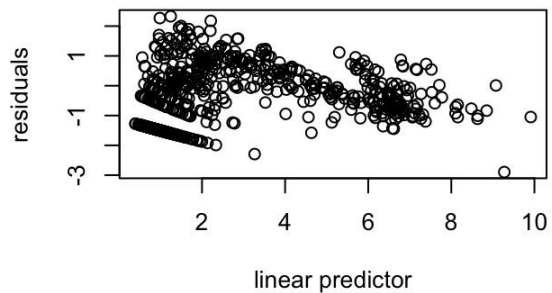

**Histogram of residuals**

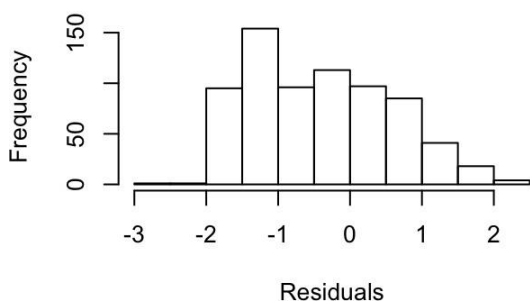

**Response vs. Fitted Values**

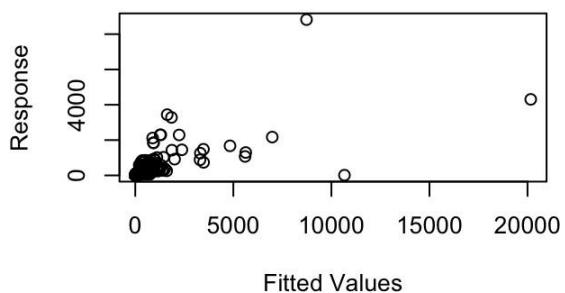

```

##
## Method: REML   Optimizer: outer newton
## full convergence after 19 iterations.
## Gradient range [-0.0002419147,0.0007436145]
## (score 2687.494 & scale 1).
## eigenvalue range [-0.0001766961,195.6325].
## Model rank = 131 / 131
##
## Basis dimension (k) checking results. Low p-value (k-index<1) may
## indicate that k is too low, especially if edf is close to k'.
##
##
##           k'      edf k-index p-value
## s(lat,lon)      4.90e+01 5.38e+00   0.74 <2e-16 ***
## s(num.records)  9.00e+00 8.84e+00   0.48 <2e-16 ***
## s(temp)         9.00e+00 2.09e-03   0.89  0.850
## s(dissolved.oxygen) 9.00e+00 6.69e-01   0.84  0.395
## s(primary.productivity) 9.00e+00 1.59e-03   0.83  0.315
## s(chlorophyll)   9.00e+00 2.01e-03   0.80  0.050 *
## s(current)       9.00e+00 8.63e-04   0.88  0.790
## s(o2.saturate)   9.00e+00 8.60e-01   0.86  0.650
## s(salinity)      9.00e+00 8.51e-01   0.82  0.205
## s(nitrate)       9.00e+00 1.40e+00   0.80  0.065 .
## ---
## Signif. codes:  0 '***' 0.001 '**' 0.01 '*' 0.05 '.' 0.1 ' ' 1

```

```
summary(shallow.numsp.env)
```

```

##
## Family: Negative Binomial(0.728)
## Link function: log
##
## Formula:
## num.species ~ s(lat, lon, bs = "sos") + s(num.records) + s(temp) +
##   s(dissolved.oxygen) + s(primary.productivity) + s(chlorophyll) +
##   s(current) + s(o2.saturate) + s(salinity) + s(nitrate)
##
## Parametric coefficients:
##           Estimate Std. Error z value Pr(>|z|)
## (Intercept)  2.66998    0.04741   56.32  <2e-16 ***
## ---
## Signif. codes:  0 '***' 0.001 '**' 0.01 '*' 0.05 '.' 0.1 ' ' 1
##
## Approximate significance of smooth terms:
##           edf Ref.df   Chi.sq  p-value
## s(lat,lon)    5.3823776    49   14.832 0.000545 ***
## s(num.records) 8.8397292     9 1609.506 < 2e-16 ***
## s(temp)       0.0020898     9    0.001 0.143235
## s(dissolved.oxygen) 0.6685280     9    0.942 0.069083 .
## s(primary.productivity) 0.0015915     9    0.001 0.350595
## s(chlorophyll) 0.0020123     9    0.003 0.203619
## s(current)    0.0008629     9    0.000 0.704874
## s(o2.saturate) 0.8599729     9    1.733 0.107133
## s(salinity)   0.8513896     9    5.520 0.002008 **
## s(nitrate)    1.4007490     9    5.087 0.007049 **
## ---
## Signif. codes:  0 '***' 0.001 '**' 0.01 '*' 0.05 '.' 0.1 ' ' 1
##
## R-sq.(adj) =  -1.85   Deviance explained = 74.3%
## -REML= 2687.5Scale est. = 1           n = 705

```

## Model selection for number of species, shallow water

Here we use AIC to compare models for goodness of fit while penalizing for overparameterization. Models are ranked in order of AIC score, with lowest scoring model (model with the best compromise between fit and complexity) first in the list. The delta AIC represents how much the AIC score for each model differs from the top model, and can be used as an estimate of the relative support for each model. A delta AIC of 2 is considered to be potentially a significantly better fit, with higher delta AICs between models indicating increasingly larger differences in model fit while correcting for the number of parameters.

```

shallow.numsp.models <- list(shallow.numsp.intercept = shallow.numsp.intercept,
                             shallow.numsp.numrec = shallow.numsp.numrec,
                             shallow.numsp.latlon = shallow.numsp.latlon,
                             shallow.numsp.temp = shallow.numsp.temp,
                             shallow.numsp.oxygen = shallow.numsp.oxygen,
                             shallow.numsp.prod = shallow.numsp.prod,
                             shallow.numsp.chlorophyll = shallow.numsp.chlorophyll,
                             shallow.numsp.current = shallow.numsp.current,
                             shallow.numsp.o2.saturate = shallow.numsp.o2.saturate,
                             shallow.numsp.salinity = shallow.numsp.salinity,
                             shallow.numsp.nitrate = shallow.numsp.nitrate,
                             shallow.numsp.env = shallow.numsp.env)
shallow.numsp.aic.df <- data.frame(Model = names(shallow.numsp.models),
                                   AIC = sapply(shallow.numsp.models, function(x) x$aic),
                                   akaike.weights(sapply(shallow.numsp.models, function(x)
x$aic)))

shallow.numsp.aic.df <- shallow.numsp.aic.df[order(shallow.numsp.aic.df$AIC),]
shallow.numsp.aic.df$Cumulative.Weight <- cumsum(shallow.numsp.aic.df$weights)

kable(shallow.numsp.aic.df, row.names = FALSE)

```

| Model                     | AIC      | deltaAIC    | rel.LL    | weights   | Cumulative.Weight |
|---------------------------|----------|-------------|-----------|-----------|-------------------|
| shallow.numsp.salinity    | 5318.205 | 0.0000000   | 1.0000000 | 0.2104098 | 0.2104098         |
| shallow.numsp.env         | 5318.527 | 0.3222579   | 0.8511823 | 0.1790971 | 0.3895069         |
| shallow.numsp.temp        | 5319.780 | 1.5747971   | 0.4550270 | 0.0957421 | 0.4852491         |
| shallow.numsp.latlon      | 5320.046 | 1.8404896   | 0.3984215 | 0.0838318 | 0.5690808         |
| shallow.numsp.prod        | 5320.047 | 1.8412992   | 0.3982602 | 0.0837979 | 0.6528787         |
| shallow.numsp.chlorophyll | 5320.047 | 1.8414643   | 0.3982274 | 0.0837909 | 0.7366696         |
| shallow.numsp.current     | 5320.048 | 1.8427285   | 0.3979757 | 0.0837380 | 0.8204076         |
| shallow.numsp.o2.saturate | 5320.201 | 1.9957224   | 0.3686671 | 0.0775712 | 0.8979788         |
| shallow.numsp.oxygen      | 5320.817 | 2.6119011   | 0.2709149 | 0.0570032 | 0.9549820         |
| shallow.numsp.nitrate     | 5321.289 | 3.0839880   | 0.2139540 | 0.0450180 | 1.0000000         |
| shallow.numsp.numrec      | 5374.309 | 56.1033173  | 0.0000000 | 0.0000000 | 1.0000000         |
| shallow.numsp.intercept   | 6231.247 | 913.0422064 | 0.0000000 | 0.0000000 | 1.0000000         |

```
write.csv(shallow.numsp.aic.df, file = "shallow.numsp.aic.csv")
```

Here we see that the model containing salinity is the best fit, but many other models are almost as good. It is particularly noteworthy that the model containing only the effects of spatial autocorrelation (the "latlon" model) has a delta AIC of < 2 compared to the best-performing model. However, we know that latitude is highly correlated with several of the environmental predictors. That being the case, it is hard to determine which, if any, environmental predictors are affecting the number of species in shallow water. T



# Plots for number of species, shallow water

Here we plot the effects of each environmental predictor from its respective single-variable model.

```
qplot(shallow$temp, predict(shallow.numsp.temp, shallow)) + geom_smooth(method = "gam")
```

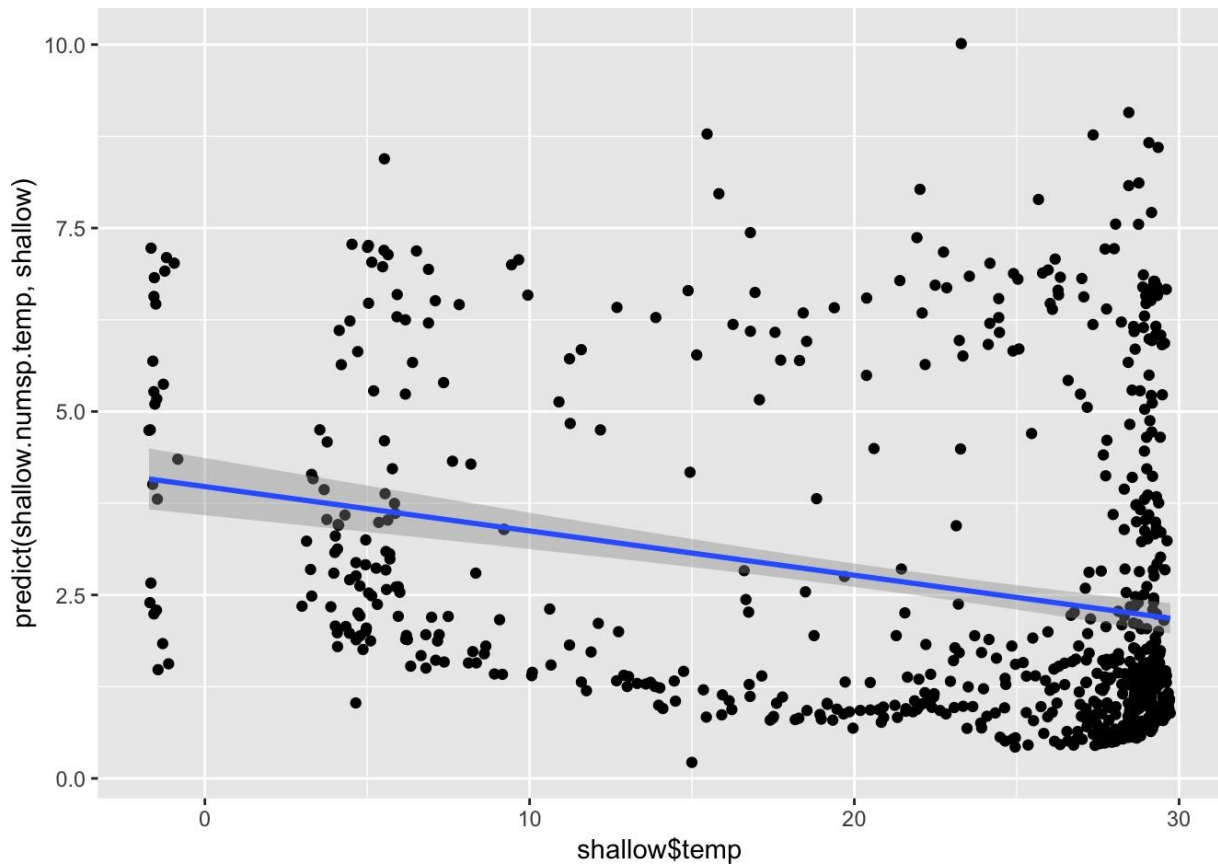

```
qplot(shallow$primary.productivity, predict(shallow.numsp.prod, shallow)) + geom_smooth(method = "gam")
```

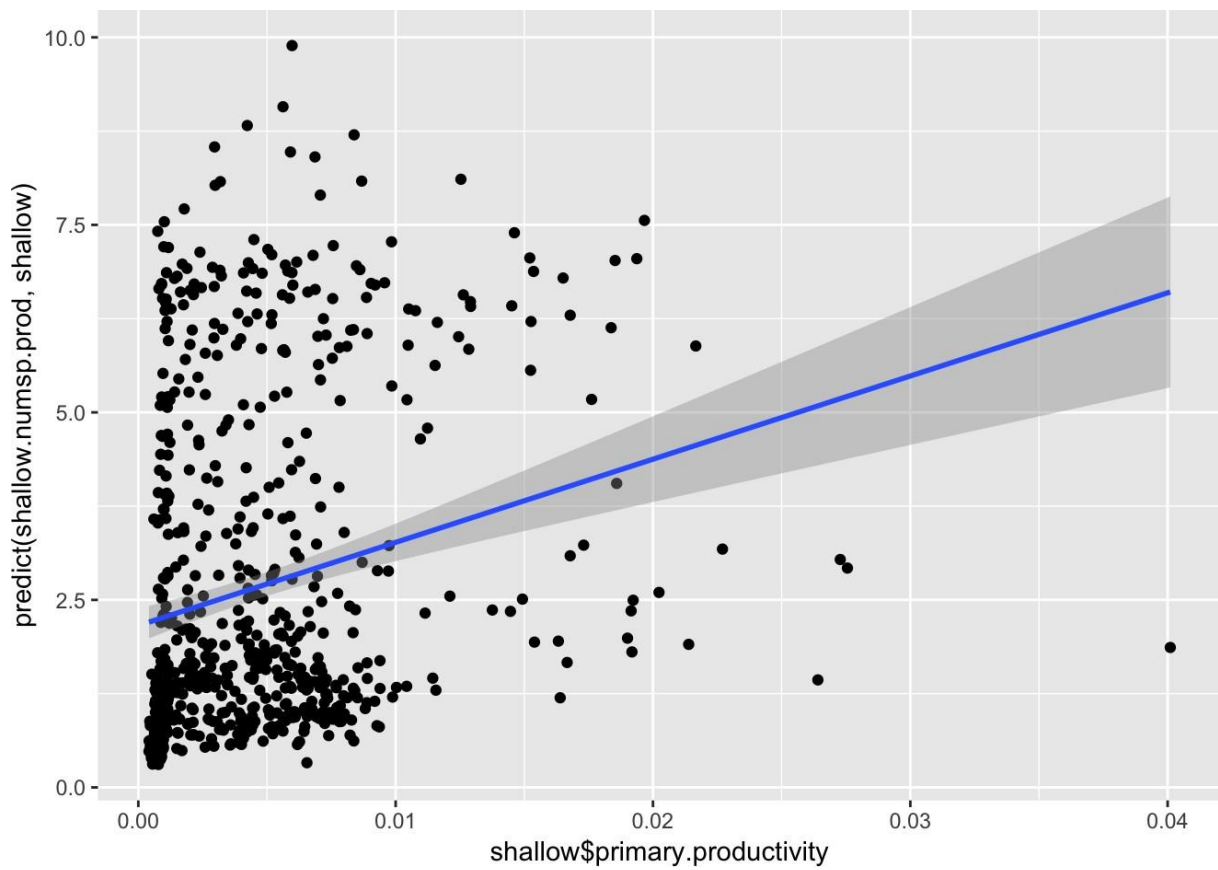

```
qplot(shallow$dissolved.oxygen, predict(shallow.numsp.oxygen, shallow)) + geom_smooth(method = "gam")
```

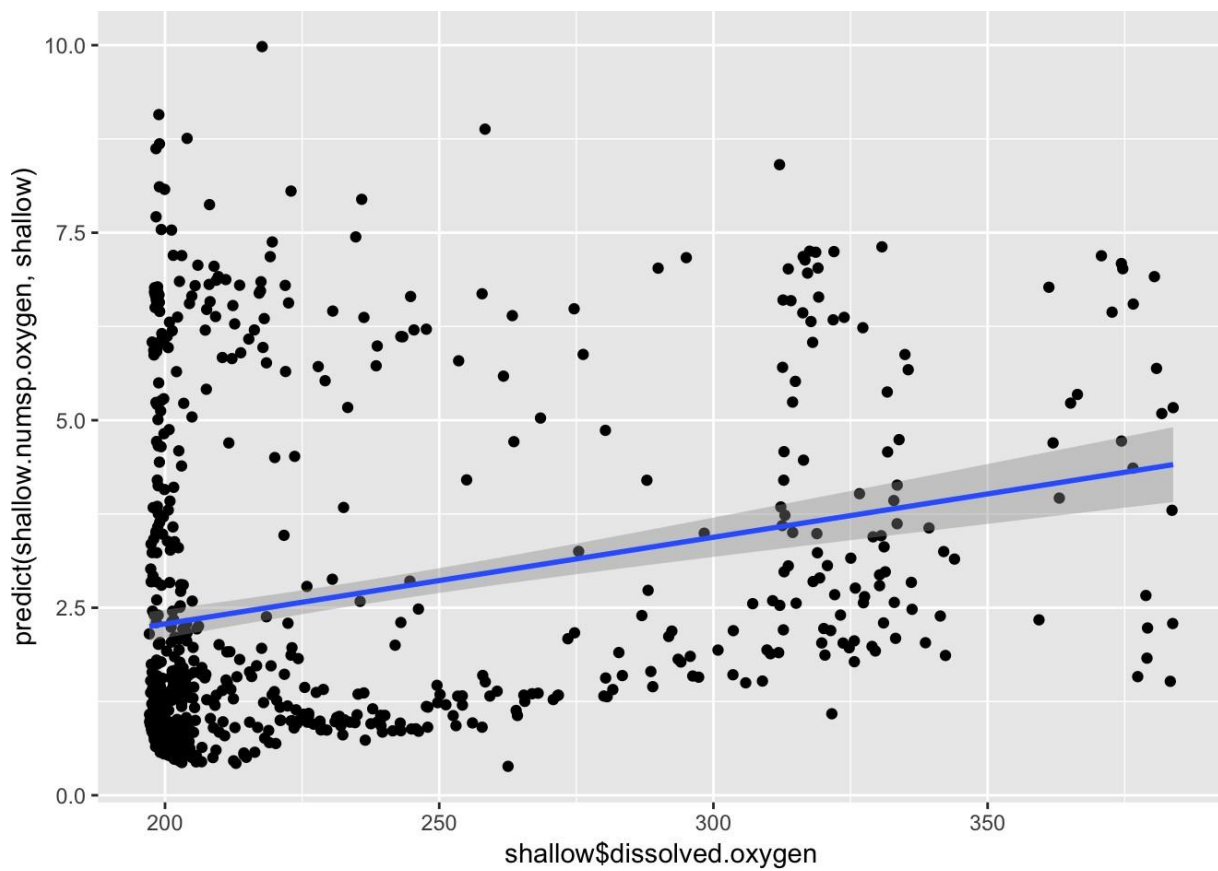

```
qplot(shallow$chlorophyll, predict(shallow.numsp.chlorophyll, shallow)) + geom_smooth(method = "gam")
```

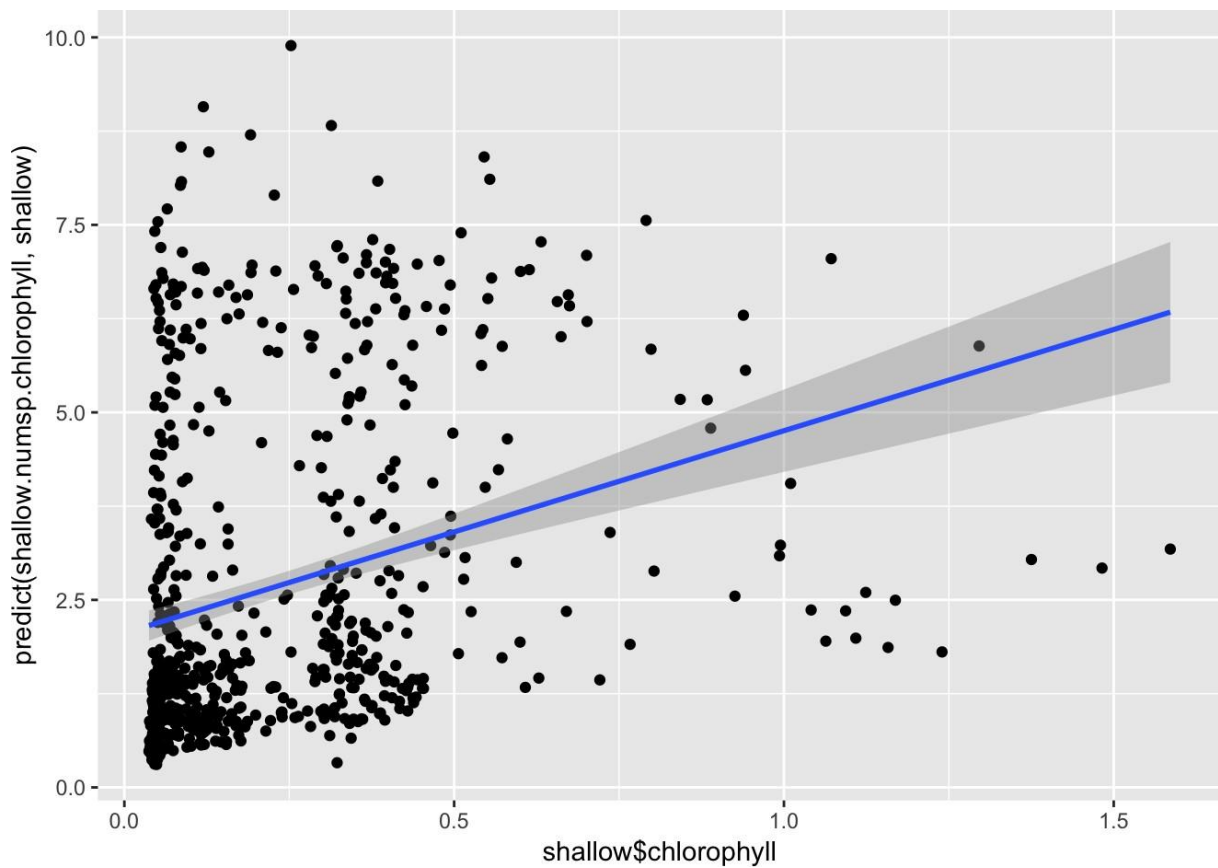

```
qplot(shallow$current, predict(shallow.numsp.current, shallow)) + geom_smooth(method = "gam")
```

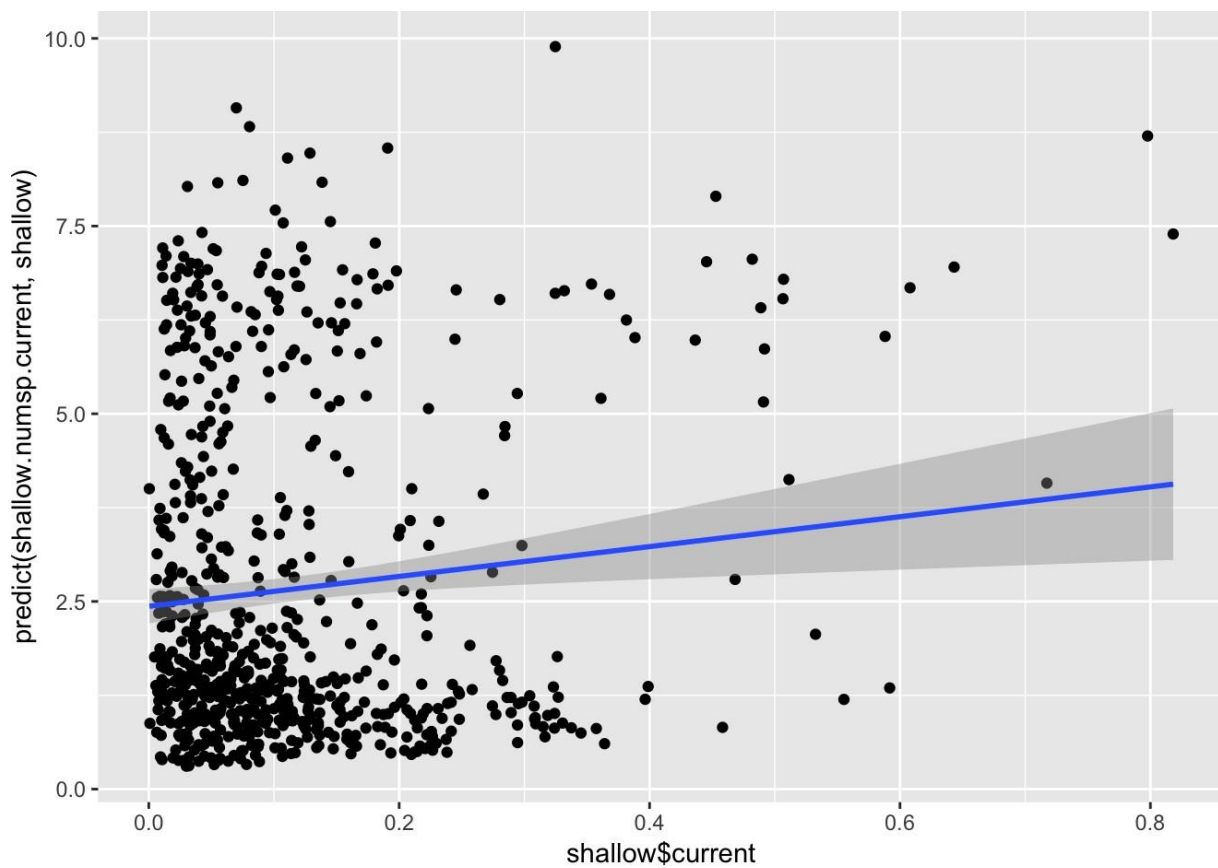

```
qplot(shallow$o2.saturation, predict(shallow.numsp.o2.saturation, shallow)) + geom_smooth(method = "gam")
```

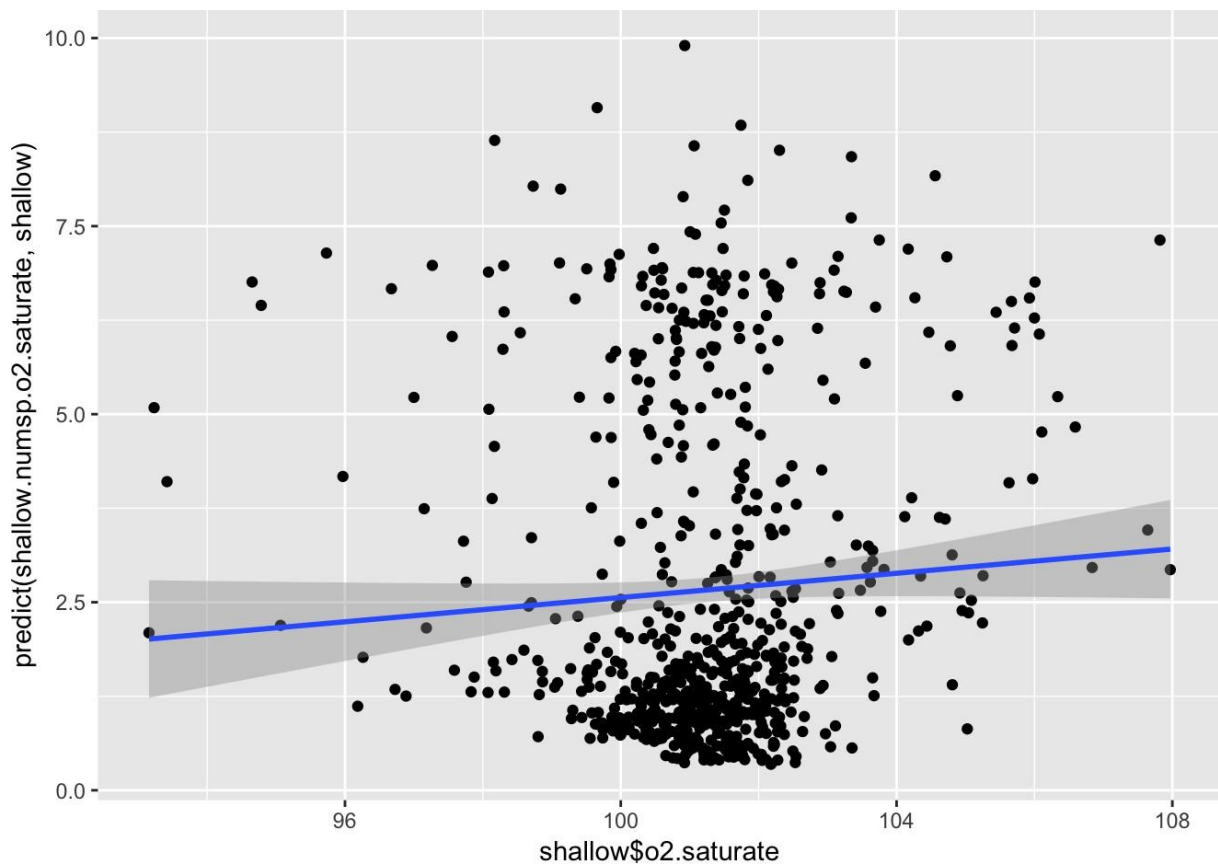

```
qplot(shallow$salinity, predict(shallow.numsp.salinity, shallow)) + geom_smooth(method = "gam")
```

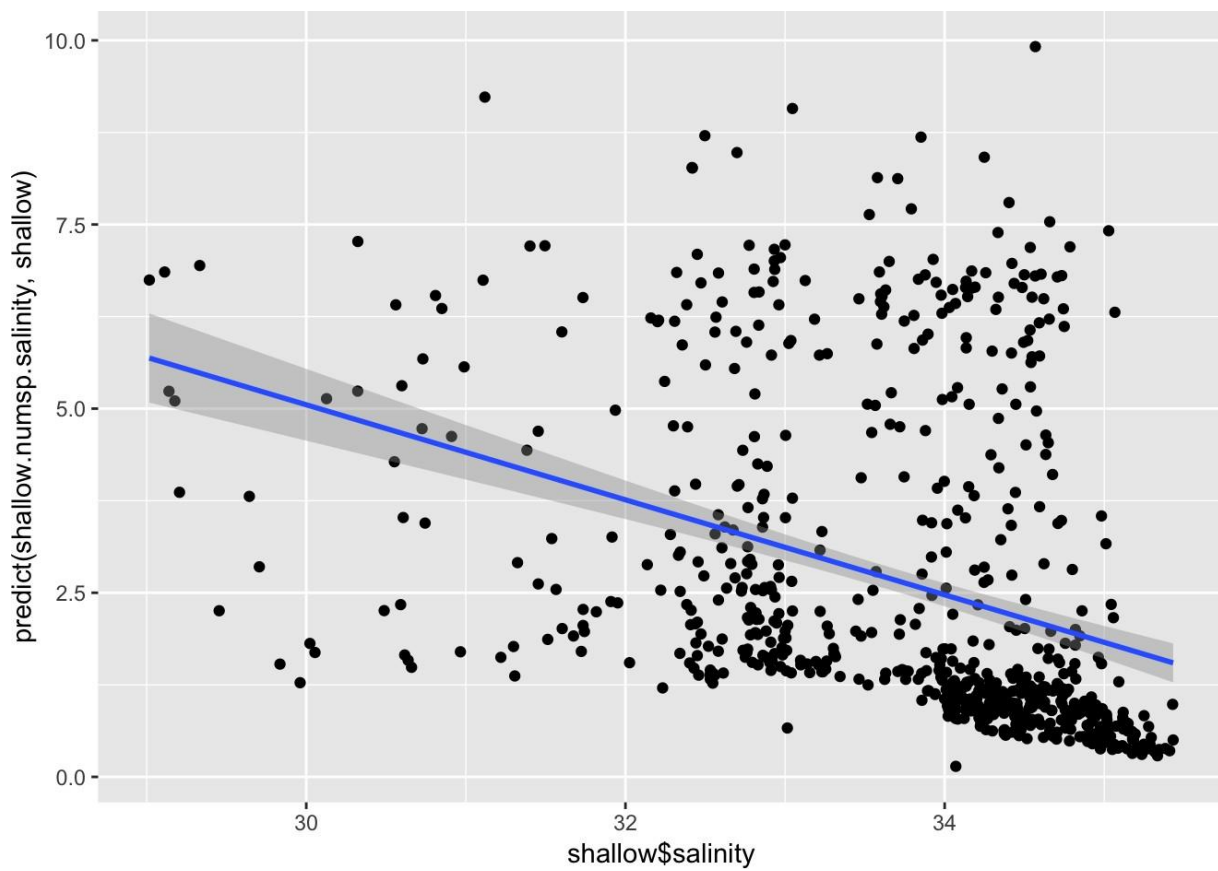

```
qplot(shallow$nitrate, predict(shallow.numsp.nitrate, shallow)) + geom_smooth(method = "gam")
```

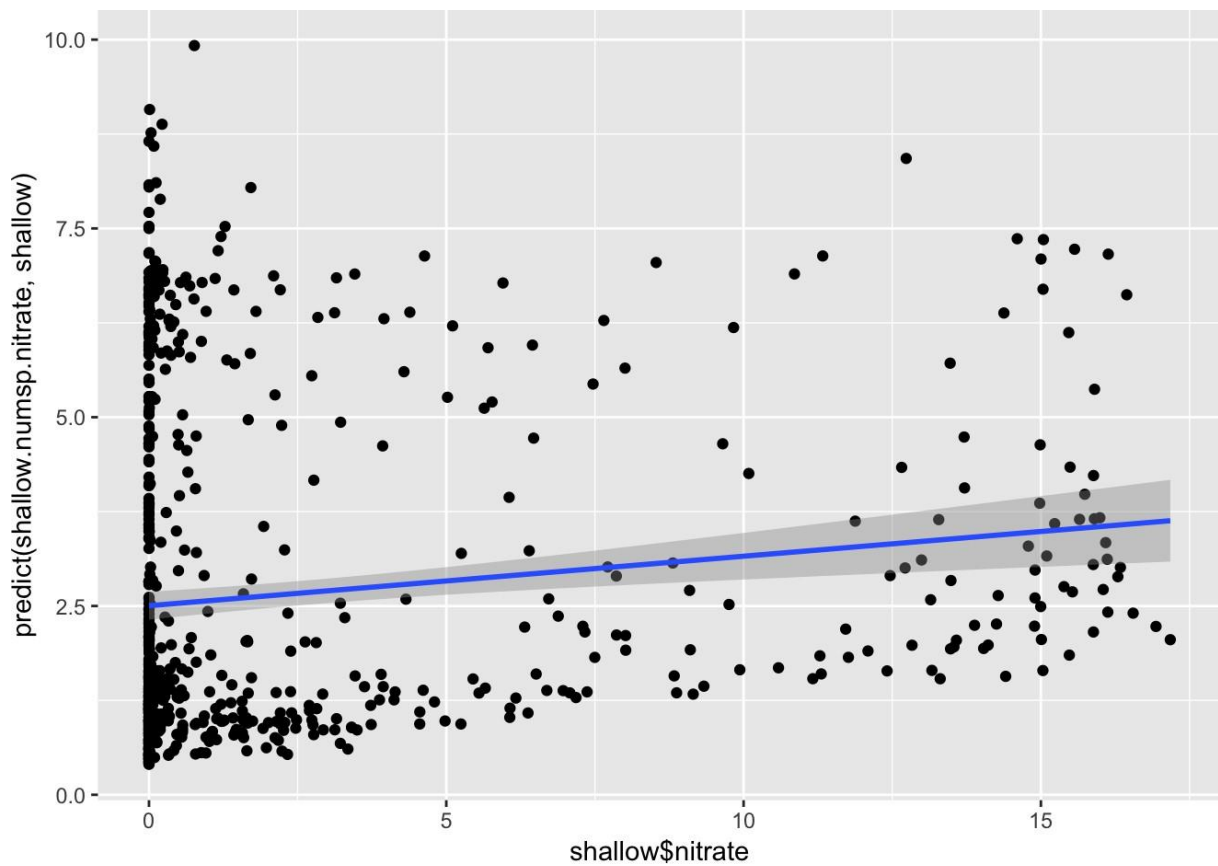

## GAMs for ES50, shallow water

These models are identical to the above, except that the response variable is the species richness estimated from the rarefaction curves. These are meant to be estimates of species richness if all sites were sampled equally. Since these measurements are intended to take sampling effort into account, we exclude the “no.records” term for these models.

```
shallow.es50.intercept <- gam(ES50 ~ 1, data = shallow, family = "nb", method = "RE
ML", select = TRUE)
gam.check(shallow.es50.intercept)
```

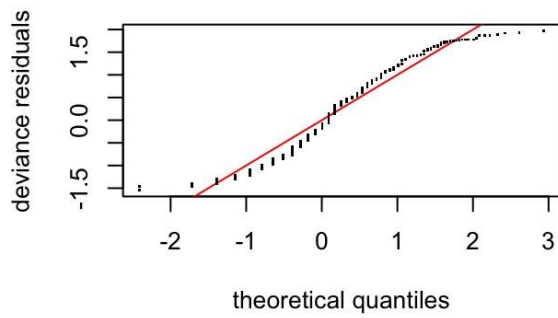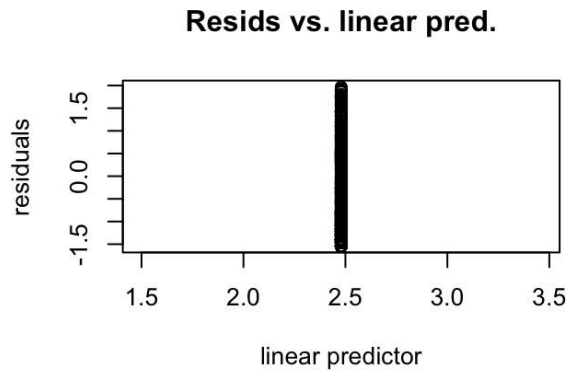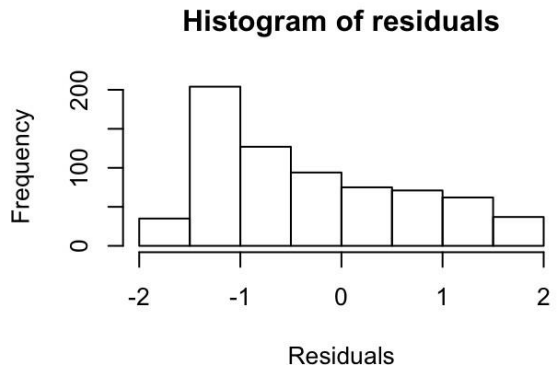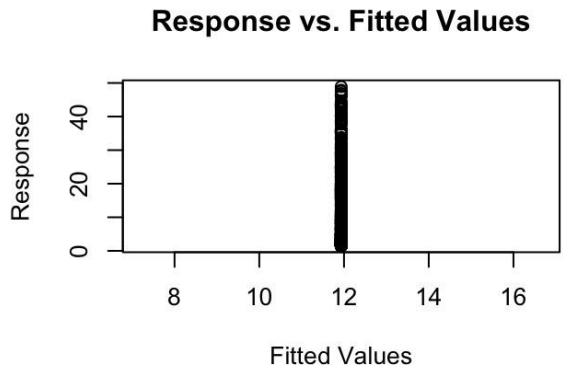

```
##
## Method: REML   Optimizer: outer newton
## full convergence after 3 iterations.
## Gradient range [5.595699e-09,5.595699e-09]
## (score 2476.994 & scale 1).
## Hessian positive definite, eigenvalue range [335.1861,335.1861].
## Model rank = 1 / 1
```

```
summary(shallow.es50.intercept)
```

```
##
## Family: Negative Binomial(1.231)
## Link function: log
##
## Formula:
## ES50 ~ 1
##
## Parametric coefficients:
##           Estimate Std. Error z value Pr(>|z|)
## (Intercept)  2.47939    0.03566   69.53  <2e-16 ***
## ---
## Signif. codes:  0 '***' 0.001 '**' 0.01 '*' 0.05 '.' 0.1 ' ' 1
##
## R-sq.(adj) =      0   Deviance explained = 3.56e-08%
## -REML = 2477   Scale est. = 1           n = 705
```

```
shallow.es50.latlon <- gam(ES50 ~ s(lat, lon, bs = "sos") , data = shallow, family
= "nb", method = "REML", select = TRUE)
gam.check(shallow.es50.latlon)
```

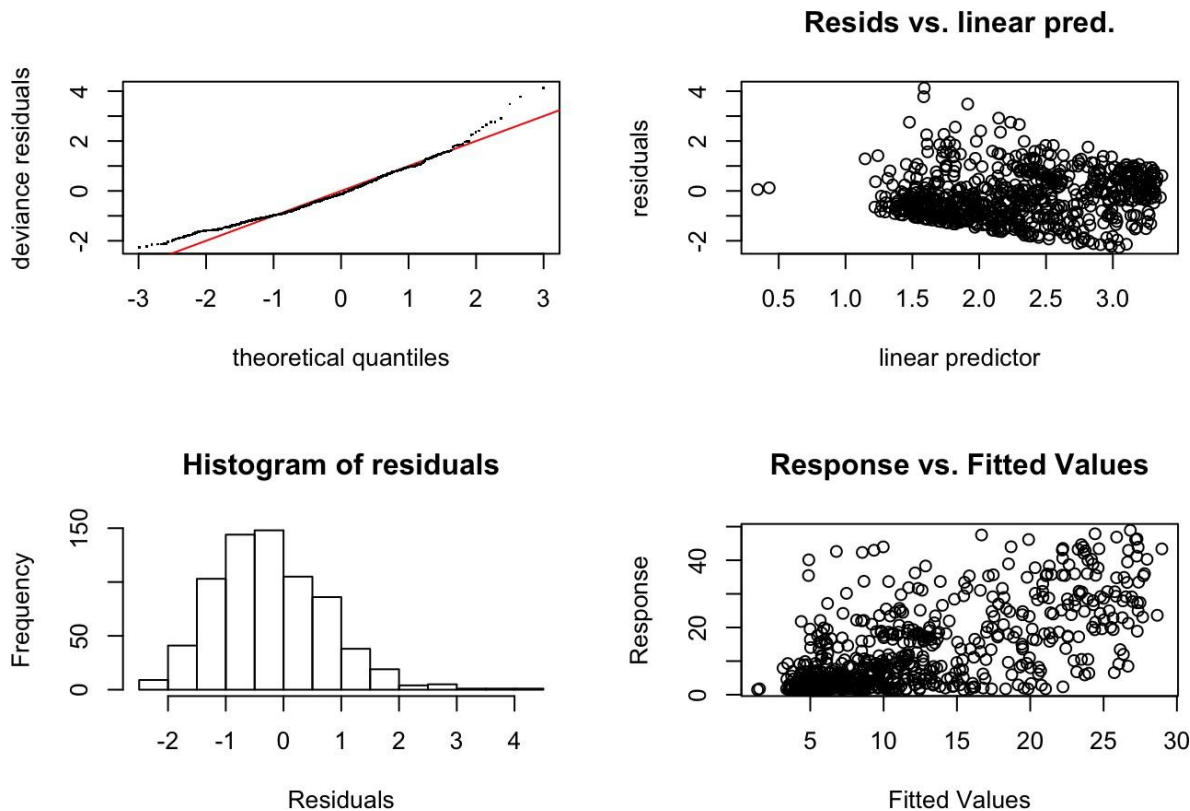

```
##
## Method: REML   Optimizer: outer newton
## full convergence after 3 iterations.
## Gradient range [-1.636573e-06,1.452781e-05]
## (score 2341.56 & scale 1).
## Hessian positive definite, eigenvalue range [9.722589,234.1502].
## Model rank = 50 / 50
##
## Basis dimension (k) checking results. Low p-value (k-index<1) may
## indicate that k is too low, especially if edf is close to k'.
##
##           k'   edf k-index p-value
## s(lat,lon) 49.0 34.2   0.84 <2e-16 ***
## ---
## Signif. codes:  0 '****' 0.001 '***' 0.01 '**' 0.05 '.' 0.1 ' ' 1
```

```
summary(shallow.es50.latlon)
```

```
##
## Family: Negative Binomial(2.106)
## Link function: log
##
## Formula:
## ES50 ~ s(lat, lon, bs = "sos")
##
## Parametric coefficients:
##             Estimate Std. Error z value Pr(>|z|)
## (Intercept)  2.28253    0.02904   78.59  <2e-16 ***
## ---
## Signif. codes:  0 '***' 0.001 '**' 0.01 '*' 0.05 '.' 0.1 ' ' 1
##
## Approximate significance of smooth terms:
##             edf Ref.df Chi.sq p-value
## s(lat,lon)  34.23    49 436.6  <2e-16 ***
## ---
## Signif. codes:  0 '***' 0.001 '**' 0.01 '*' 0.05 '.' 0.1 ' ' 1
##
## R-sq.(adj) =  0.415   Deviance explained =  42%
## -REML = 2341.6   Scale est. = 1           n = 705
```

```
shallow.es50.temp <- gam(ES50 ~ s(lat, lon, bs = "sos") + s(temp), data = shallow,
family = "nb", method = "REML", select = TRUE)
gam.check(shallow.es50.temp)
```

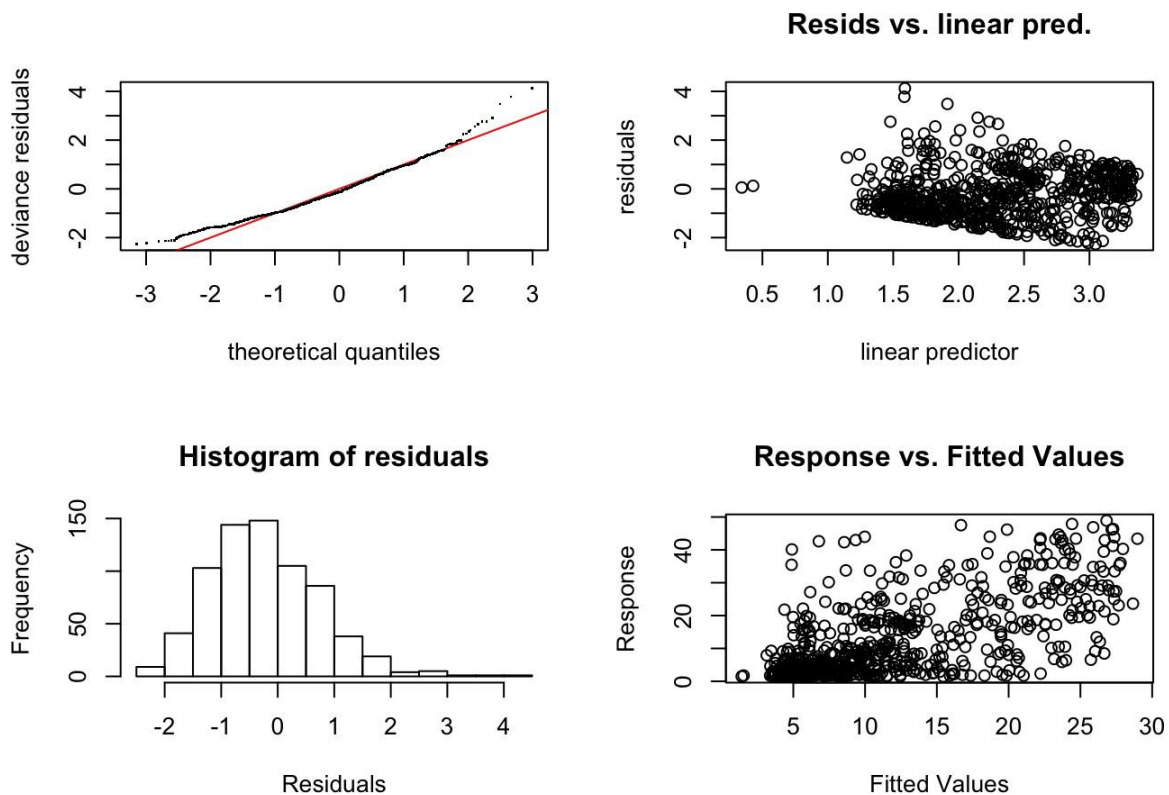



```
##
##Method:REML  Optimizer: outer newton
## full convergence after 6 iterations.
## Gradient range [-0.0007373449,0.0003134109]
## (score 2341.561 & scale 1).
## Hessian positive definite, eigenvalue range [1.390536e-05,234.1496].
## Modelrank = 59 / 59
##
##Basis dimension (k) checking results. Low p-value (k-index<1) may
## indicate that k is too low, especially if edf is close to k'.
##
##           k'      edf k-index p-value
## s(lat,lon) 49.00000 34.23233   0.84 <2e-16 ***
## s(temp)    9.00000  0.00244   0.97   0.74
## ---
## Signif. codes:  0 '***' 0.001 '**' 0.01 '*' 0.05 '.' 0.1 ' ' 1
```

```
summary(shallow.es50.temp)
```

```
##
## Family: Negative Binomial(2.106)
## Link function: log
##
## Formula:
## ES50 ~ s(lat, lon, bs = "sos") + s(temp)
##
## Parametric coefficients:
##           Estimate Std. Error z value Pr(>|z|)
## (Intercept)  2.28253    0.02904   78.59 <2e-16 ***
## ---
## Signif. codes:  0 '***' 0.001 '**' 0.01 '*' 0.05 '.' 0.1 ' ' 1
##
## Approximate significance of smooth terms:
##           edf Ref.df  Chi.sq p-value
## s(lat,lon) 34.232332    49 434.804 <2e-16 ***
## s(temp)    0.002443     9   0.001   0.511
## ---
## Signif. codes:  0 '***' 0.001 '**' 0.01 '*' 0.05 '.' 0.1 ' ' 1
##
## R-sq.(adj) =  0.415  Deviance explained =  42%
## -REML= 2341.6 Scale est. = 1          n = 705
```

```
shallow.es50.oxygen <- gam(ES50 ~ s(lat, lon, bs = "sos") + s(dissolved.oxygen),
data = shallow, family = "nb", method = "REML", select = TRUE)
gam.check(shallow.es50.oxygen)
```

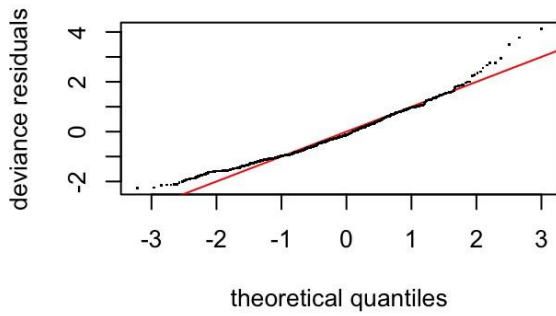

Resids vs. linear pred.

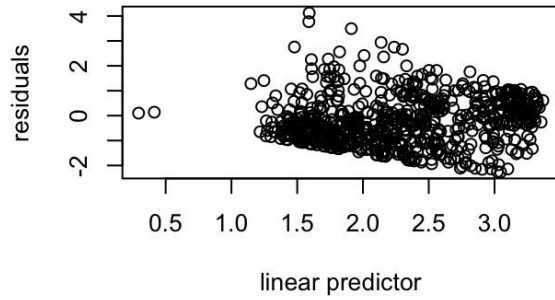

Histogram of residuals

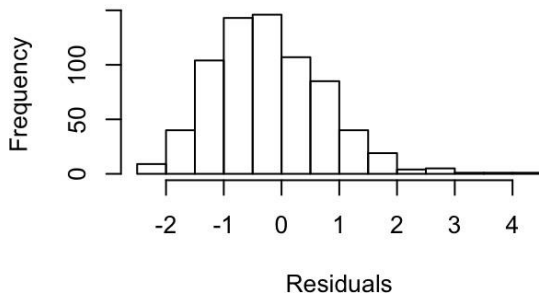

Response vs. Fitted Values

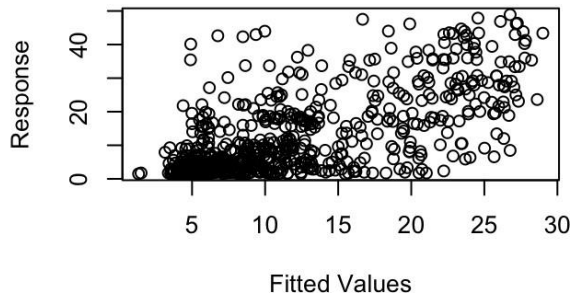

```
##
## Method: REML   Optimizer: outer newton
## full convergence after 3 iterations.
## Gradient range [-0.0002385339,0.0001233648]
## (score 2341.47 & scale 1).
## Hessian positive definite, eigenvalue range [0.0002383868,233.6167].
## Model rank = 59 / 59
##
## Basis dimension (k) checking results. Low p-value (k-index<1) may
## indicate that k is too low, especially if edf is close to k'.
##
##           k'   edf k-index p-value
## s(lat,lon) 49.000 33.884  0.84 <2e-16 ***
## s(dissolved.oxygen) 9.000 0.809  0.95  0.5
## ---
## Signif. codes:  0 '***' 0.001 '**' 0.01 '*' 0.05 '.' 0.1 ' ' 1
```

```
summary(shallow.es50.oxygen)
```

```
##
## Family: Negative Binomial(2.109)
## Link function: log
##
## Formula:
## ES50 ~ s(lat, lon, bs = "sos") + s(dissolved.oxygen)
##
## Parametric coefficients:
##             Estimate Std. Error z value Pr(>|z|)
## (Intercept)  2.28207   0.02903   78.62  <2e-16 ***
## ---
## Signif. codes:  0 '***' 0.001 '**' 0.01 '*' 0.05 '.' 0.1 ' ' 1
##
## Approximate significance of smooth terms:
##             edf Ref.df Chi.sq p-value
## s(lat,lon)    33.884   49 416.405 <2e-16 ***
## s(dissolved.oxygen) 0.809    9   1.138 0.0899 .
## ---
## Signif. codes:  0 '***' 0.001 '**' 0.01 '*' 0.05 '.' 0.1 ' ' 1
##
## R-sq.(adj) =  0.418   Deviance explained=42.1%
## -REML=2341.5Scale est. = 1           n = 705
```

```
shallow.es50.prod <- gam(ES50 ~ s(lat, lon, bs = "sos") + s(primary.productivit
y), data = shallow, family = "nb", method = "REML", select = TRUE)
gam.check(shallow.es50.prod)
```

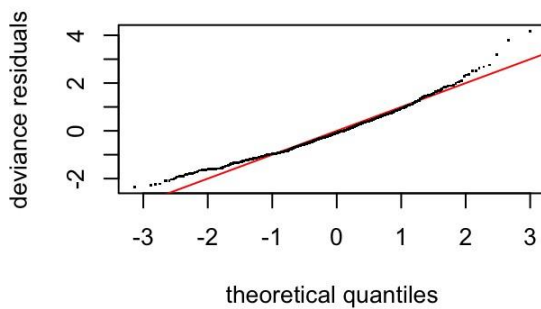

**Resids vs. linear pred.**

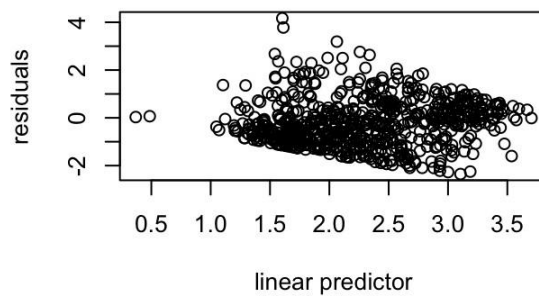

**Histogram of residuals**

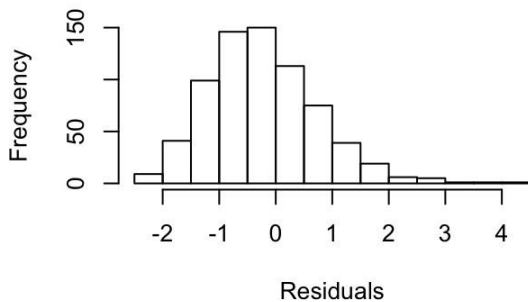

**Response vs. Fitted Values**

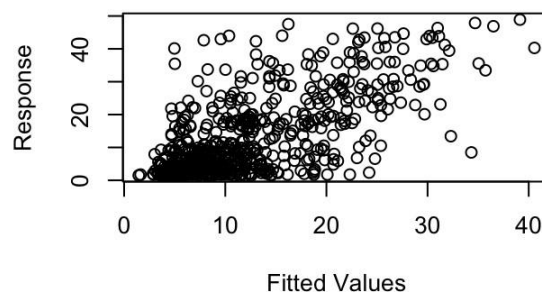

```
##
##Method:REML  Optimizer: outer newton
## full convergence after 5 iterations.
## Gradient range [-1.662754e-06,3.139754e-06]
## (score 2331.933 & scale 1).
## Hessian positive definite, eigenvalue range [0.1293296,226.2702].
## Model rank = 59 / 59
##
##Basis dimension (k) checking results. Low p-value (k-index<1) may
## indicate that k is too low, especially if edf is close to k'.
##
##              k'   edf k-index p-value
## s(lat,lon)      49.00 34.19   0.85 <2e-16 ***
## s(primary.productivity) 9.00 3.37   0.99   0.85
## ---
## Signif. codes:  0 '***' 0.001 '**' 0.01 '*' 0.05 '.' 0.1 ' ' 1
```

```
summary(shallow.es50.prod)
```

```
##
## Family: Negative Binomial(2.209)
## Link function: log
##
## Formula:
## ES50 ~ s(lat, lon, bs = "sos") + s(primary.productivity)
##
## Parametric coefficients:
##              Estimate Std. Error z value Pr(>|z|)
## (Intercept)  2.27083    0.02856   79.52 <2e-16 ***
## ---
## Signif. codes:  0 '***' 0.001 '**' 0.01 '*' 0.05 '.' 0.1 ' ' 1
##
## Approximate significance of smooth terms:
##              edf Ref.df Chi.sq  p-value
## s(lat,lon)      34.19     49 422.70 < 2e-16 ***
## s(primary.productivity) 3.37      9  27.48 2.04e-07 ***
## ---
## Signif. codes:  0 '***' 0.001 '**' 0.01 '*' 0.05 '.' 0.1 ' ' 1
##
## R-sq.(adj) =  0.455   Deviance explained = 44.6%
## -REML= 2331.9Scale est. = 1           n = 705
```

```
shallow.es50.chlorophyll <- gam(ES50 ~ s(lat, lon, bs = "sos") + s(chlorophyll),
data = shallow, family = "nb", method = "REML", select = TRUE)
gam.check(shallow.es50.chlorophyll)
```

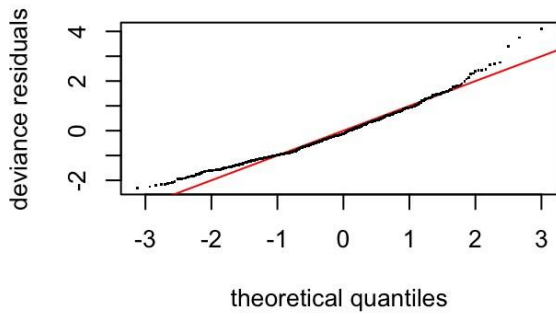

**Resids vs. linear pred.**

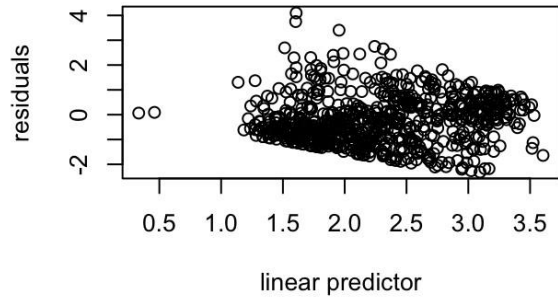

**Histogram of residuals**

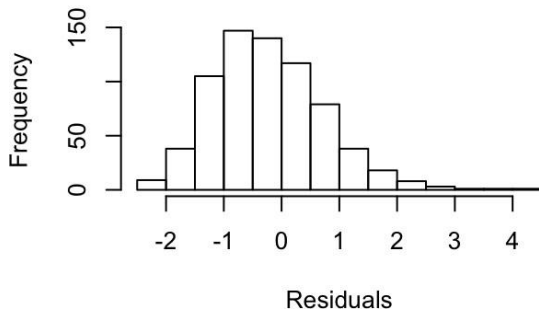

**Response vs. Fitted Values**

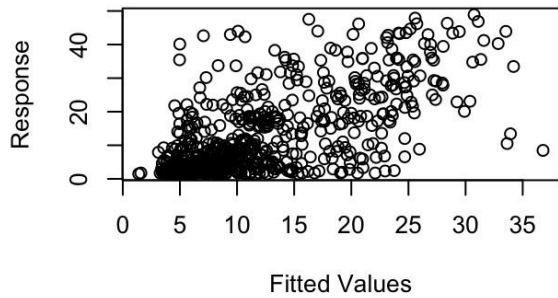

```
##
## Method: REML   Optimizer: outer newton
## full convergence after 3 iterations.
## Gradient range [-1.322651e-05,9.523495e-05]
## (score 2339.164 & scale 1).
## Hessian positive definite, eigenvalue range [0.1412794,231.8289].
## Model rank =  59 / 59
##
## Basis dimension (k) checking results. Low p-value (k-index<1) may
## indicate that k is too low, especially if edf is close to k'.
##
##           k'  edf k-index p-value
## s(lat,lon) 49.0 32.9  0.84 <2e-16 ***
## s(chlorophyll) 9.0  3.0  0.93  0.29
## ---
## Signif. codes:  0 '***' 0.001 '**' 0.01 '*' 0.05 '.' 0.1 ' ' 1
```

```
summary(shallow.es50.chlorophyll)
```

```
##
## Family: Negative Binomial(2.132)
## Link function: log
##
## Formula:
## ES50 ~ s(lat, lon, bs = "sos") + s(chlorophyll)
##
## Parametric coefficients:
##             Estimate Std. Error z value Pr(>|z|)
## (Intercept)  2.27910    0.02892   78.81  <2e-16 ***
## ---
## Signif. codes:  0 '***' 0.001 '**' 0.01 '*' 0.05 '.' 0.1 ' ' 1
##
## Approximate significance of smooth terms:
##             edf Ref.df Chi.sq p-value
## s(lat,lon)    32.934    49 390.67  <2e-16 ***
## s(chlorophyll)  2.999     9  12.88   9e-04 ***
## ---
## Signif. codes:  0 '***' 0.001 '**' 0.01 '*' 0.05 '.' 0.1 ' ' 1
##
## R-sq.(adj) =  0.418   Deviance explained = 42.8%
## -REML = 2339.2   Scale est. = 1           n = 705
```

```
shallow.es50.current <- gam(ES50 ~ s(lat, lon, bs = "sos") + s(current), data = s
hallow, family = "nb", method = "REML", select = TRUE)
gam.check(shallow.es50.current)
```

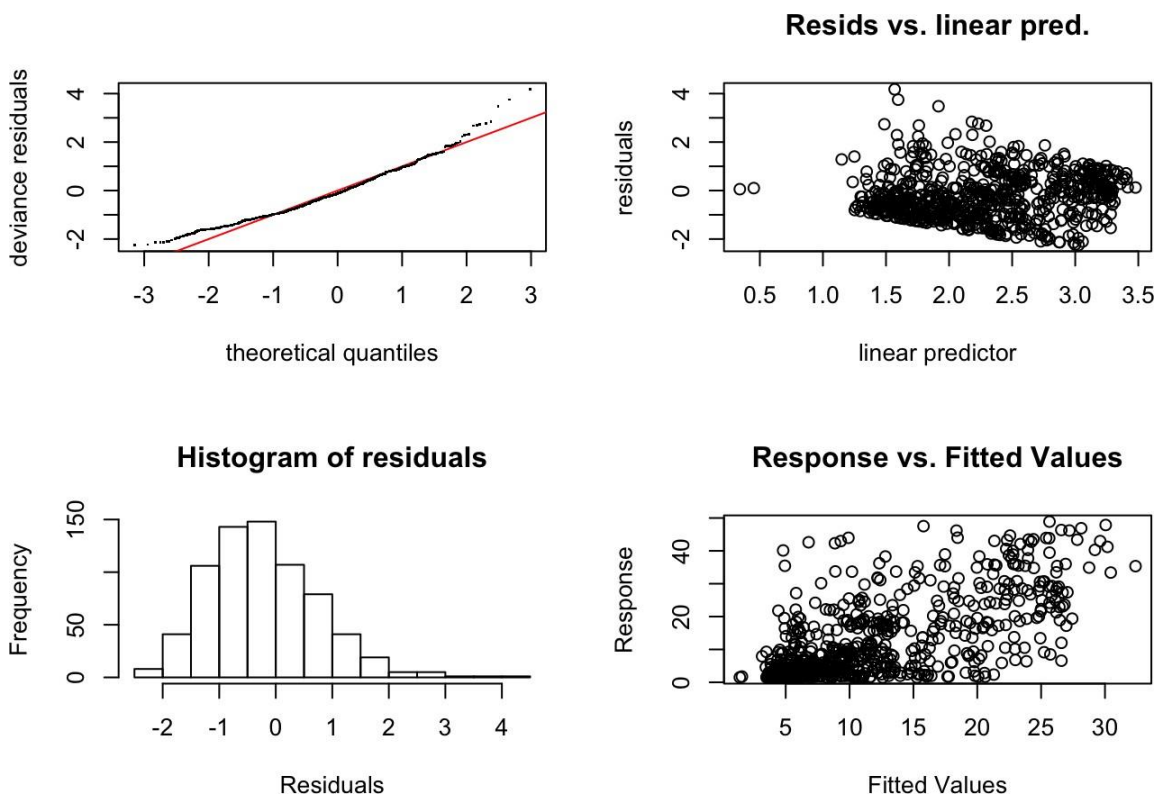

```
##
##Method:REML  Optimizer: outer newton
## full convergence after 6 iterations.
## Gradient range [-0.0006727976,0.000479441]
## (score 2341.073 & scale 1).
## Hessian positive definite, eigenvalue range [0.0006722106,234.1461].
## Modelrank = 59 / 59
##
##Basis dimension (k) checking results. Low p-value (k-index<1) may
## indicate that k is too low, especially if edf is close to k'.
##
##          k'    edf k-index p-value
## s(lat,lon) 49.000 33.585    0.84 <2e-16 ***
## s(current)  9.000  0.664    0.89  0.045 *
## ---
## Signif. codes:  0 '***' 0.001 '**' 0.01 '*' 0.05 '.' 0.1 ' ' 1
```

```
summary(shallow.es50.current)
```

```
##
## Family: Negative Binomial(2.105)
## Link function: log
##
## Formula:
## ES50 ~ s(lat, lon, bs = "sos") + s(current)
##
## Parametric coefficients:
##          Estimate Std. Error z value Pr(>|z|)
## (Intercept)  2.28275    0.02904   78.59 <2e-16 ***
## ---
## Signif. codes:  0 '***' 0.001 '**' 0.01 '*' 0.05 '.' 0.1 ' ' 1
##
## Approximate significance of smooth terms:
##          edf Ref.df  Chi.sq p-value
## s(lat,lon) 33.585    49 424.082 <2e-16 ***
## s(current)  0.664     9   1.992  0.0701 .
## ---
## Signif. codes:  0 '***' 0.001 '**' 0.01 '*' 0.05 '.' 0.1 ' ' 1
##
## R-sq.(adj)  =   0.42   Deviance explained = 41.9%
## -REML = 2341.1  Scale est. = 1           n = 705
```

```
shallow.es50.o2.saturate <- gam(ES50 ~ s(lat, lon, bs = "sos") + s(o2.saturate),
data = shallow, family = "nb", method = "REML", select = TRUE)
gam.check(shallow.es50.o2.saturate)
```

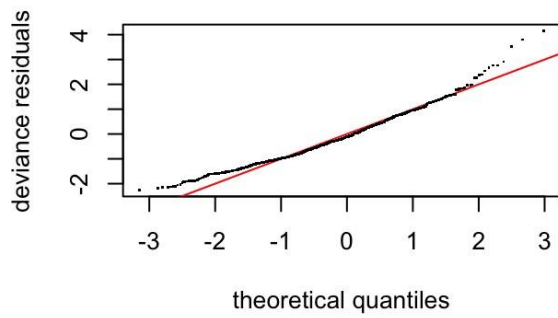

**Resids vs. linear pred.**

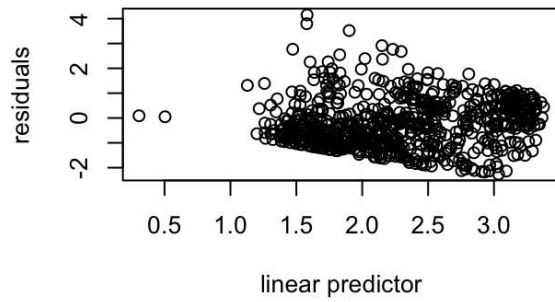

**Histogram of residuals**

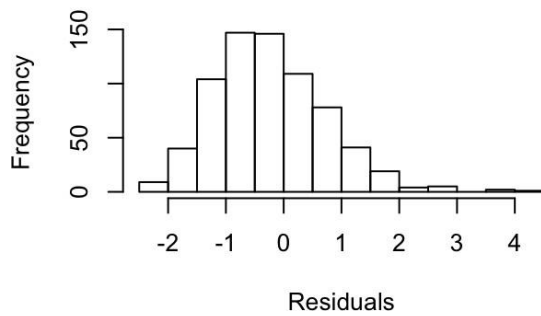

**Response vs. Fitted Values**

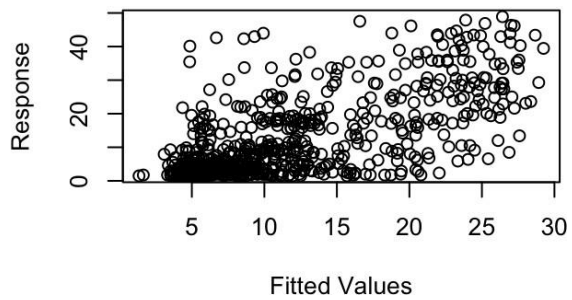

```
##
## Method: REML   Optimizer: outer newton
## full convergence after 3 iterations.
## Gradient range [-0.0006824379,0.0001868394]
## (score 2341.236 & scale 1).
## Hessian positive definite, eigenvalue range [0.0002624635,233.1806].
## Model rank = 59 / 59
##
## Basis dimension (k) checking results. Low p-value (k-index<1) may
## indicate that k is too low, especially if edf is close to k'.
##
##           k'   edf k-index p-value
## s(lat,lon) 49.00 34.06  0.84 <2e-16 ***
## s(o2.saturate) 9.00  1.17  0.85 <2e-16 ***
## ---
## Signif. codes:  0 '***' 0.001 '**' 0.01 '*' 0.05 '.' 0.1 ' ' 1
```

```
summary(shallow.es50.o2.saturate)
```



```
##
## Family: Negative Binomial(2.113)
## Link function: log
##
## Formula:
## ES50 ~ s(lat, lon, bs = "sos") + s(o2.saturate)
##
## Parametric coefficients:
##             Estimate Std. Error z value Pr(>|z|)
## (Intercept)  2.28146    0.02901   78.65  <2e-16 ***
## ---
## Signif. codes:  0 '***' 0.001 '**' 0.01 '*' 0.05 '.' 0.1 ' ' 1
##
## Approximate significance of smooth terms:
##             edf Ref.df  Chi.sq p-value
## s(lat,lon)    34.06    49 420.777 <2e-16 ***
## s(o2.saturate)  1.17     9   2.303 0.0988 .
## ---
## Signif. codes:  0 '***' 0.001 '**' 0.01 '*' 0.05 '.' 0.1 ' ' 1
##
## R-sq.(adj) =  0.418   Deviance explained = 42.2%
## -REML = 2341.2   Scale est. = 1           n = 705
```

```
shallow.es50.salinity <- gam(ES50 ~ s(lat, lon, bs = "sos") + s(salinity), data =
shallow, family = "nb", method = "REML", select = TRUE)
gam.check(shallow.es50.salinity)
```

**Resids vs. linear pred.**

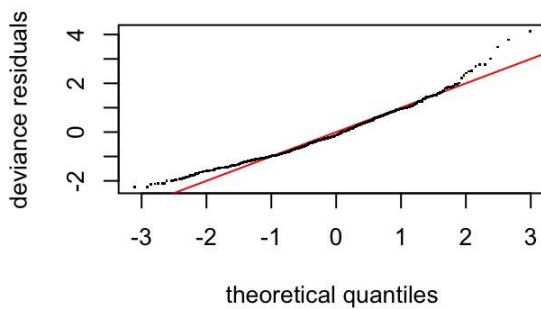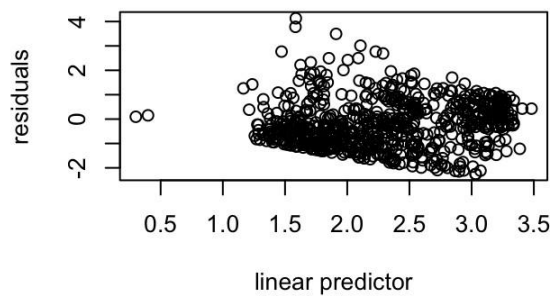

**Histogram of residuals**

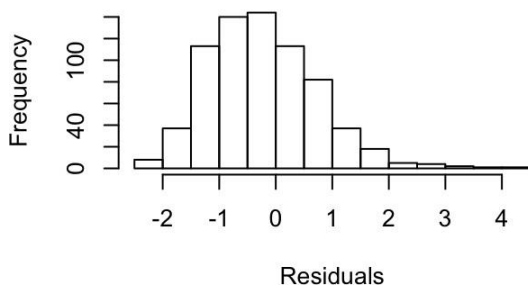

**Response vs. Fitted Values**

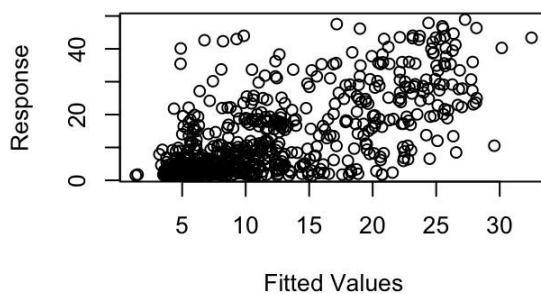

```
##
##Method:REML Optimizer: outer newton
## full convergence after 6 iterations.
## Gradient range [-0.001116754,0.0001808395]
## (score 2340.619 & scale 1).
## Hessian positive definite, eigenvalue range [0.0405921,233.8519].
## Model rank = 59 / 59
##
##Basis dimension (k) checking results. Low p-value (k-index<1) may
## indicate that k is too low, especially if edf is close to k'.
##
##           k'   edf k-index p-value
## s(lat,lon) 49.00 33.18   0.84 <2e-16 ***
## s(salinity) 9.00  1.09   0.91  0.075.
## ---
## Signif. codes:  0 '***' 0.001 '**' 0.01 '*' 0.05 '.' 0.1 ' ' 1
```

```
summary(shallow.es50.salinity)
```

```
##
## Family: Negative Binomial(2.107)
## Link function: log
##
## Formula:
## ES50 ~ s(lat, lon, bs = "sos") + s(salinity)
##
## Parametric coefficients:
##           Estimate Std. Error z value Pr(>|z|)
## (Intercept) 2.28242   0.02904   78.6 <2e-16 ***
## ---
## Signif. codes:  0 '***' 0.001 '**' 0.01 '*' 0.05 '.' 0.1 ' ' 1
##
## Approximate significance of smooth terms:
##           edf Ref.df  Chi.sq p-value
## s(lat,lon) 33.177   49 335.316 <2e-16 ***
## s(salinity)  1.092    9   4.042  0.0188 *
## ---
## Signif. codes:  0 '***' 0.001 '**' 0.01 '*' 0.05 '.' 0.1 ' ' 1
##
## R-sq.(adj) = 0.418 Deviance explained = 42%
## -REML=2340.6Scale est. = 1          n = 705
```

```
shallow.es50.nitrate <- gam(ES50 ~ s(lat, lon, bs = "sos") + s(nitrate), data = s
hallow, family = "nb", method = "REML", select = TRUE)
gam.check(shallow.es50.nitrate)
```

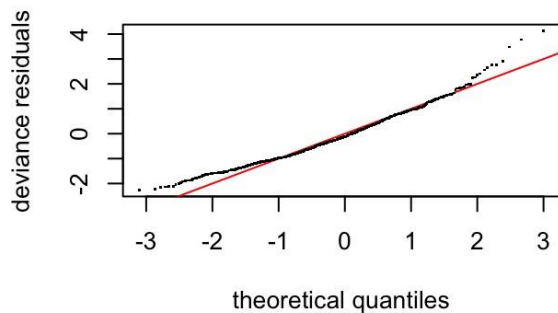

Resids vs. linear pred.

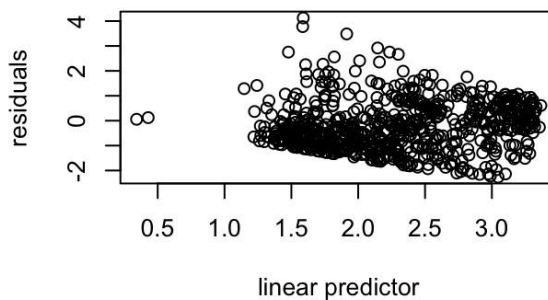

Histogram of residuals

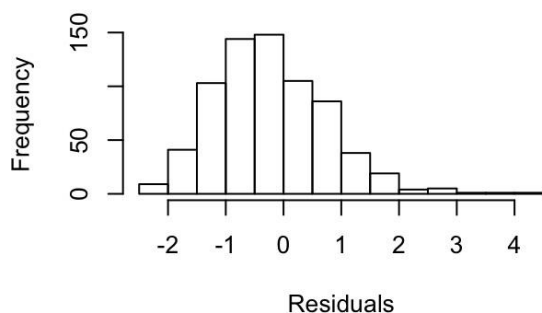

Response vs. Fitted Values

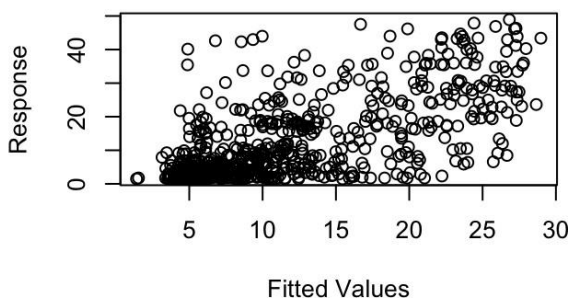

```
##
## Method: REML   Optimizer: outer newton
## full convergence after 6 iterations.
## Gradient range [-0.0008761779,0.0005350955]
## (score 2341.561 & scale 1).
## Hessian positive definite, eigenvalue range [1.174703e-05,234.1503].
## Model rank = 59 / 59
##
## Basis dimension (k) checking results. Low p-value (k-index<1) may
## indicate that k is too low, especially if edf is close to k'.
##
##           k'      edf k-index p-value
## s(lat,lon) 49.0000 34.2330   0.84 <2e-16 ***
## s(nitrate)  9.0000  0.0019   0.90   0.13
## ---
## Signif. codes:  0 '***' 0.001 '**' 0.01 '*' 0.05 '.' 0.1 ' ' 1
```

```
summary(shallow.es50.nitrate)
```

```
##
## Family: Negative Binomial(2.106)
## Link function: log
##
## Formula:
## ES50 ~ s(lat, lon, bs = "sos") + s(nitrate)
##
## Parametric coefficients:
##             Estimate Std. Error z value Pr(>|z|)
## (Intercept)  2.28253    0.02904   78.59 <2e-16 ***
## ---
## Signif. codes:  0 '***' 0.001 '**' 0.01 '*' 0.05 '.' 0.1 ' ' 1
##
## Approximate significance of smooth terms:
##             edf Ref.df Chi.sq p-value
## s(lat,lon) 34.233015     49 436.6 <2e-16 ***
## s(nitrate)  0.001901      9   0.0      1
## ---
## Signif. codes:  0 '***' 0.001 '**' 0.01 '*' 0.05 '.' 0.1 ' ' 1
##
## R-sq.(adj) =  0.415   Deviance explained =  42%
## -REML=2341.6Scale est. = 1             n = 705
```

```
shallow.es50.env <- gam(ES50 ~ s(lat, lon, bs = "sos") + s(temp) + s(dissolved.oxy
gen) + s(primary.productivity) + s(chlorophyll) + s(current) + s(o2.saturate) + s(s
alinity) + s(nitrate), data = shallow, family = "nb", method = "REML", select = TRU
E)
gam.check(shallow.es50.env)
```

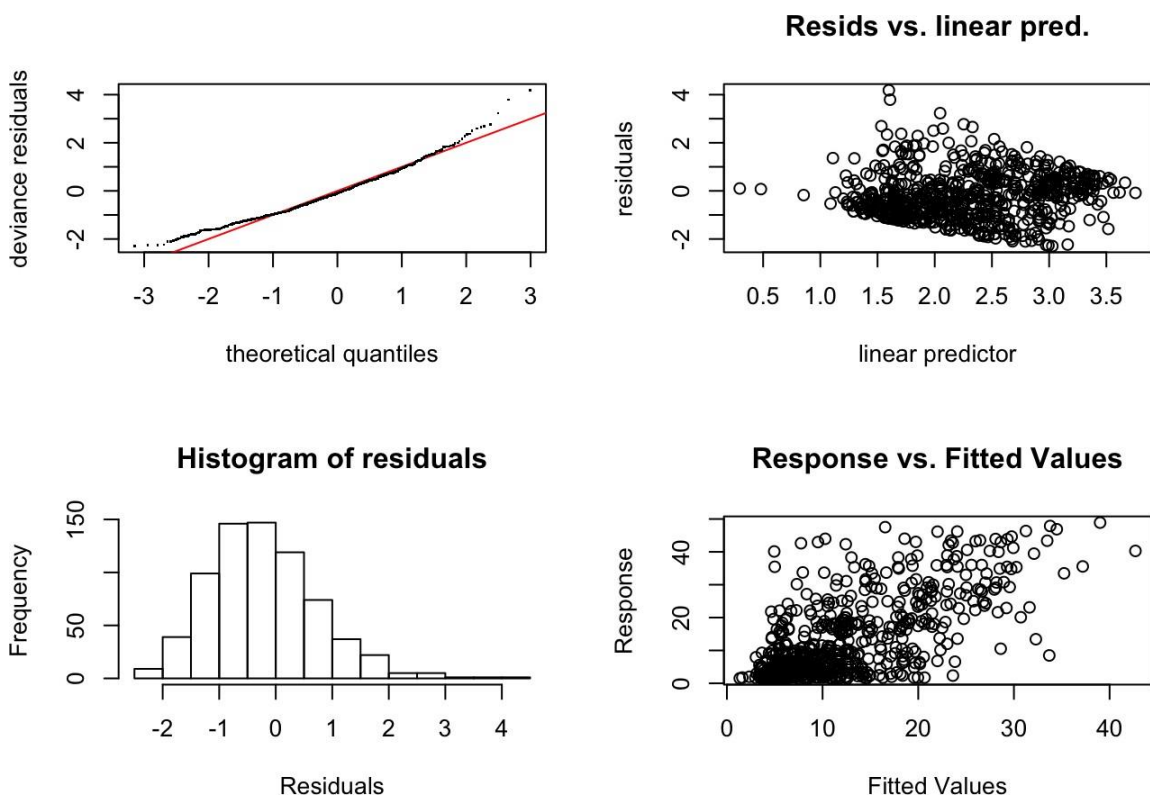

```

##
## Method: REML   Optimizer: outer newton
## full convergence after 9 iterations.
## Gradient range [-0.001211478,6.695132e-05]
## (score 2331.218 & scale 1).
## Hessian positive definite, eigenvalue range [1.934616e-05,225.6091].
## Model rank = 122 / 122
##
## Basis dimension (k) checking results. Low p-value (k-index<1) may
## indicate that k is too low, especially if edf is close to k'.
##
##
##           k'      edf k-index p-value
## s(lat,lon)      4.90e+01 3.30e+01   0.85 <2e-16 ***
## s(temp)          9.00e+00 6.46e-04   0.99  0.850
## s(dissolved.oxygen) 9.00e+00 4.76e-01   0.95  0.515
## s(primary.productivity) 9.00e+00 3.37e+00   0.99  0.820
## s(chlorophyll)    9.00e+00 1.13e-03   0.93  0.300
## s(current)        9.00e+00 1.09e-03   0.90  0.075 .
## s(o2.saturate)    9.00e+00 4.17e-01   0.85  0.010 **
## s(salinity)       9.00e+00 8.96e-01   0.91  0.175
## s(nitrate)        9.00e+00 8.89e-02   0.91  0.100 .
## ---
## Signif. codes:  0 '***' 0.001 '**' 0.01 '*' 0.05 '.' 0.1 ' ' 1

```

```
summary(shallow.es50.env)
```

```

##
## Family: Negative Binomial(2.212)
## Link function: log
##
## Formula:
## ES50 ~ s(lat, lon, bs = "sos") + s(temp) + s(dissolved.oxygen) +
##   s(primary.productivity) + s(chlorophyll) + s(current) + s(o2.saturate) +
##   s(salinity) + s(nitrate)
##
## Parametric coefficients:
##           Estimate Std. Error z value Pr(>|z|)
## (Intercept)  2.27029    0.02854   79.54 <2e-16 ***
## ---
## Signif. codes:  0 '***' 0.001 '**' 0.01 '*' 0.05 '.' 0.1 ' ' 1
##
## Approximate significance of smooth terms:
##           edf Ref.df  Chi.sq p-value
## s(lat,lon)  32.976231    49 340.790 < 2e-16 ***
## s(temp)     0.000646     9   0.000  0.2707
## s(dissolved.oxygen)  0.476287     9   0.577  0.1161
## s(primary.productivity)  3.367451     9  26.460 2.2e-07 ***
## s(chlorophyll)  0.001128     9   0.001  0.3742
## s(current)     0.001091     9   0.001  0.4165
## s(o2.saturate)  0.417496     9   0.719  0.1609
## s(salinity)    0.896068     9   2.753  0.0356 *
## s(nitrate)     0.088862     9   0.089  0.2446
## ---
## Signif. codes:  0 '***' 0.001 '**' 0.01 '*' 0.05 '.' 0.1 ' ' 1
##
## R-sq.(adj) =  0.456   Deviance explained = 44.7%
## -REML= 2331.2Scale est. = 1           n = 705

```

## Model selection for ES50, shallow water

```

shallow.es50.models <- list(shallow.es50.intercept = shallow.es50.intercept,
                           shallow.es50.latlon = shallow.es50.latlon,
                           shallow.es50.temp = shallow.es50.temp,
                           shallow.es50.oxygen = shallow.es50.oxygen,
                           shallow.es50.prod = shallow.es50.prod,
                           shallow.es50.chlorophyll = shallow.es50.chlorophyll,
                           shallow.es50.current = shallow.es50.current,
                           shallow.es50.o2.saturate = shallow.es50.o2.saturate,
                           shallow.es50.salinity = shallow.es50.salinity,
                           shallow.es50.nitrate = shallow.es50.nitrate,
                           shallow.es50.env = shallow.es50.env)
shallow.es50.aic.df <- data.frame(Model = names(shallow.es50.models),
                                 AIC = sapply(shallow.es50.models, function(x) x$aic),
                                 akaike.weights(sapply(shallow.es50.models, function(x)
x$aic)))

shallow.es50.aic.df <- shallow.es50.aic.df[order(shallow.es50.aic.df$AIC),]
shallow.es50.aic.df$Cumulative.Weight <- cumsum(shallow.es50.aic.df$weights)

kable(shallow.es50.aic.df, row.names = FALSE)

```

| Model                    | AIC      | deltaAIC    | rel.LL    | weights   | Cumulative.Weight |
|--------------------------|----------|-------------|-----------|-----------|-------------------|
| shallow.es50.env         | 4598.298 | 0.0000000   | 1.0000000 | 0.5066030 | 0.5066030         |
| shallow.es50.prod        | 4598.351 | 0.0529881   | 0.9738538 | 0.4933573 | 0.9999603         |
| shallow.es50.chlorophyll | 4617.762 | 19.4646455  | 0.0000593 | 0.0000301 | 0.9999904         |
| shallow.es50.o2.saturate | 4623.036 | 24.7379396  | 0.0000042 | 0.0000022 | 0.9999925         |
| shallow.es50.oxygen      | 4623.785 | 25.4870104  | 0.0000029 | 0.0000015 | 0.9999940         |
| shallow.es50.salinity    | 4624.051 | 25.7526841  | 0.0000026 | 0.0000013 | 0.9999953         |
| shallow.es50.latlon      | 4624.161 | 25.8631607  | 0.0000024 | 0.0000012 | 0.9999965         |
| shallow.es50.temp        | 4624.162 | 25.8644170  | 0.0000024 | 0.0000012 | 0.9999978         |
| shallow.es50.nitrate     | 4624.164 | 25.8659651  | 0.0000024 | 0.0000012 | 0.9999990         |
| shallow.es50.current     | 4624.537 | 26.2390899  | 0.0000020 | 0.0000010 | 1.0000000         |
| shallow.es50.intercept   | 4951.158 | 352.8604444 | 0.0000000 | 0.0000000 | 1.0000000         |

```
write.csv(shallow.es50.aic.df, file = "shallow.es50.aic.csv")
```

Here we find strong support for the effects of the environment on ES50 in shallow water. Given that primary productivity alone does almost as good a job as all environmental predictors at once, we believe that the predictive power here is mostly coming from primary productivity. The relatively poor performance of the spatial autocorrelation-only model (delta AIC of 29.6) suggests that there is significant predictive power in the environmental variables over and above what is expected due to spatial autocorrelation alone.

## Plots for ES50, shallow water

```
qplot(shallow$temp, predict(shallow.es50.temp, shallow)) + geom_smooth(method = "gam")
```

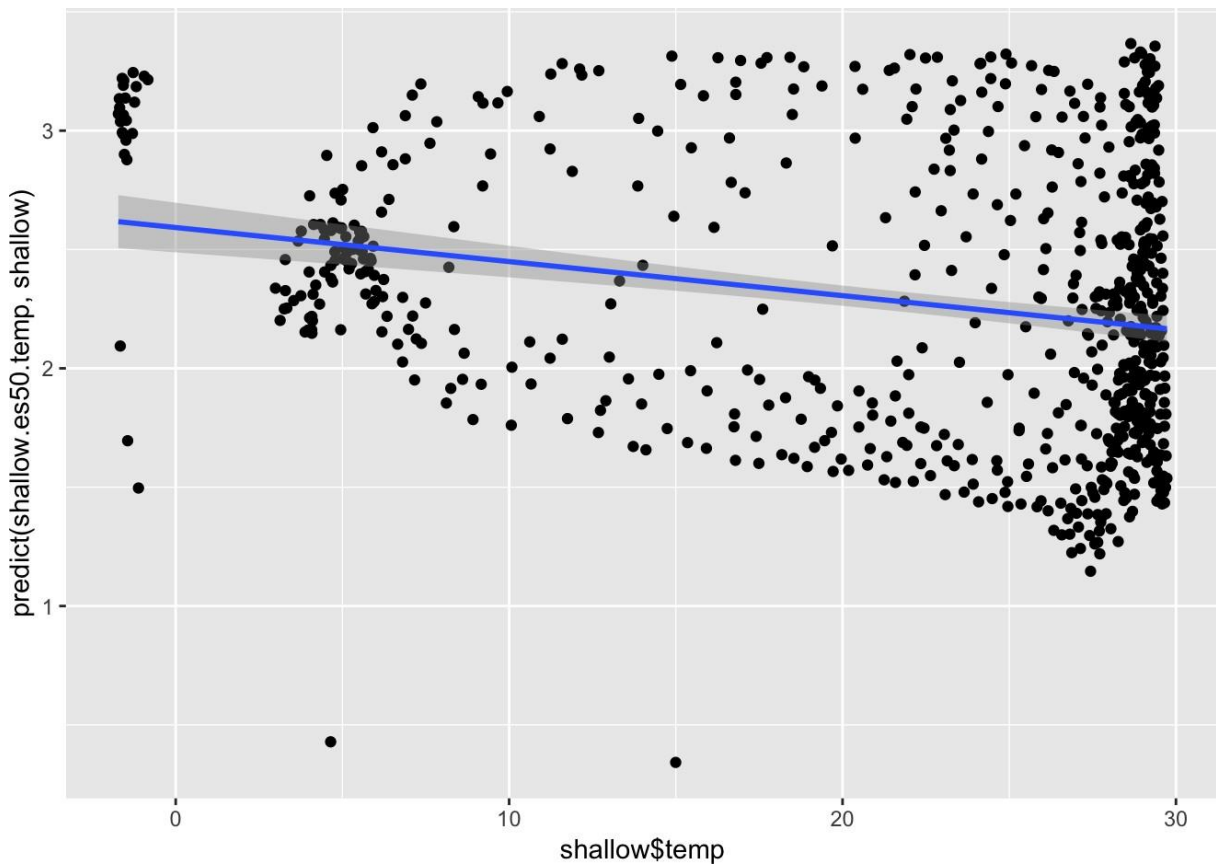

```
qplot(shallow$primary.productivity, predict(shallow.es50.prod, shallow)) + geom_smooth(
  method = "gam")
```

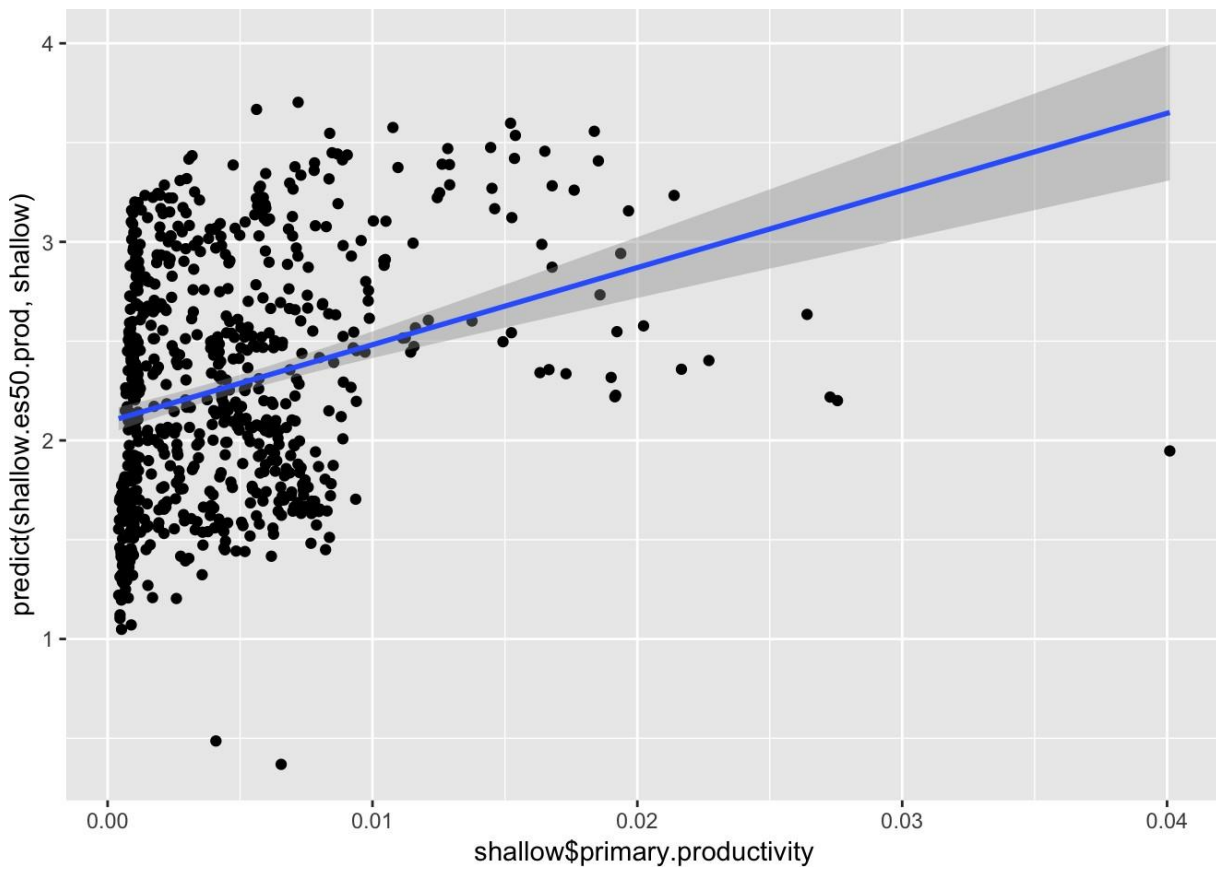

```
qplot(shallow$dissolved.oxygen, predict(shallow.es50.oxygen, shallow)) + geom_smooth(
  method = "gam")
```



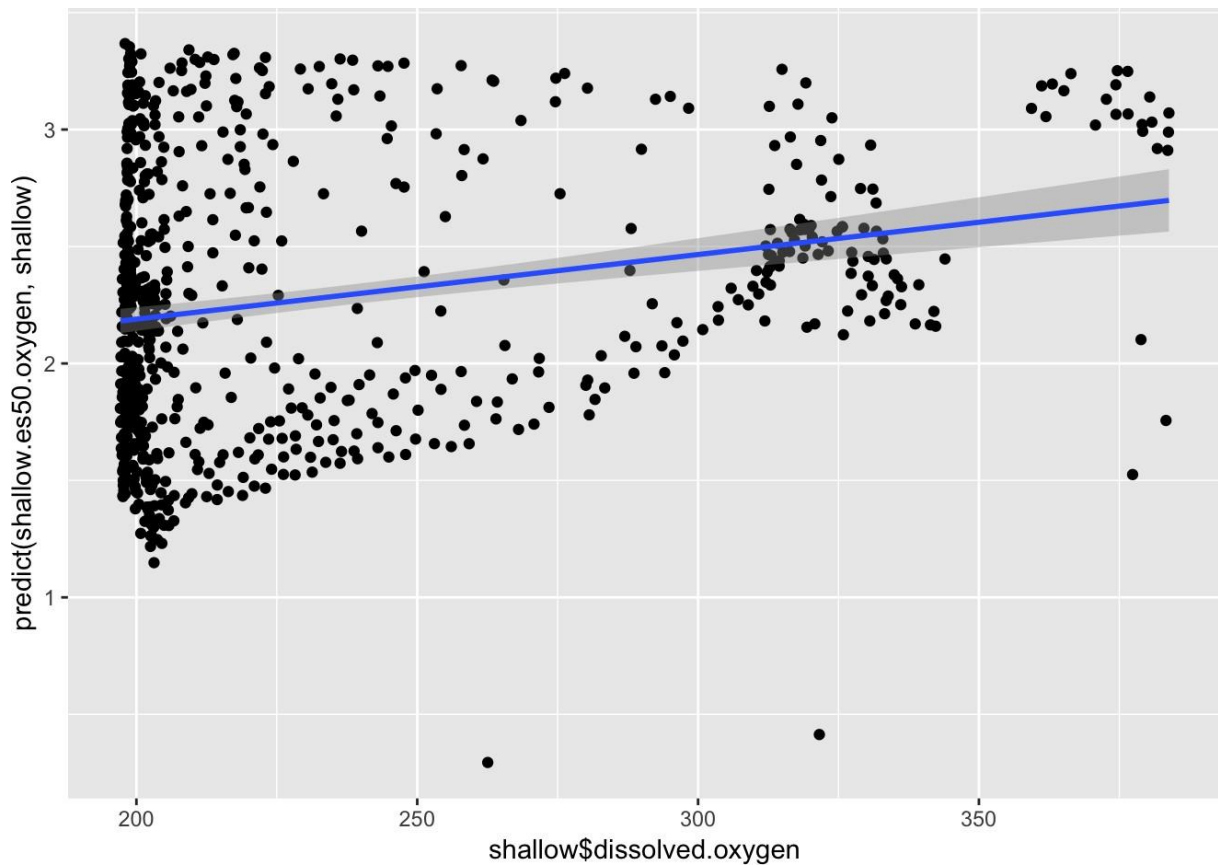

```
qplot(shallow$chlorophyll, predict(shallow.es50.chlorophyll, shallow)) + geom_smooth(
  method = "gam")
```

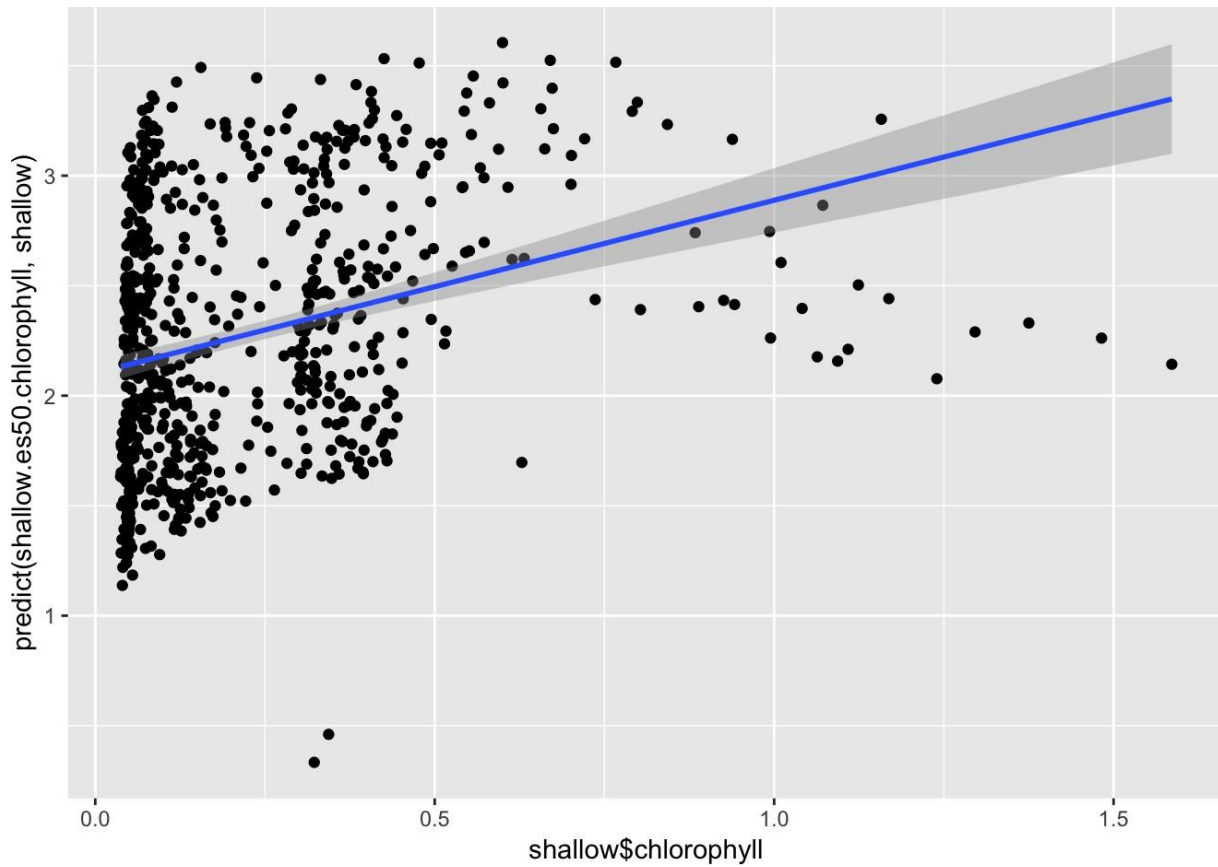

```
qplot(shallow$current, predict(shallow.es50.current, shallow)) + geom_smooth(method = "gam")
```

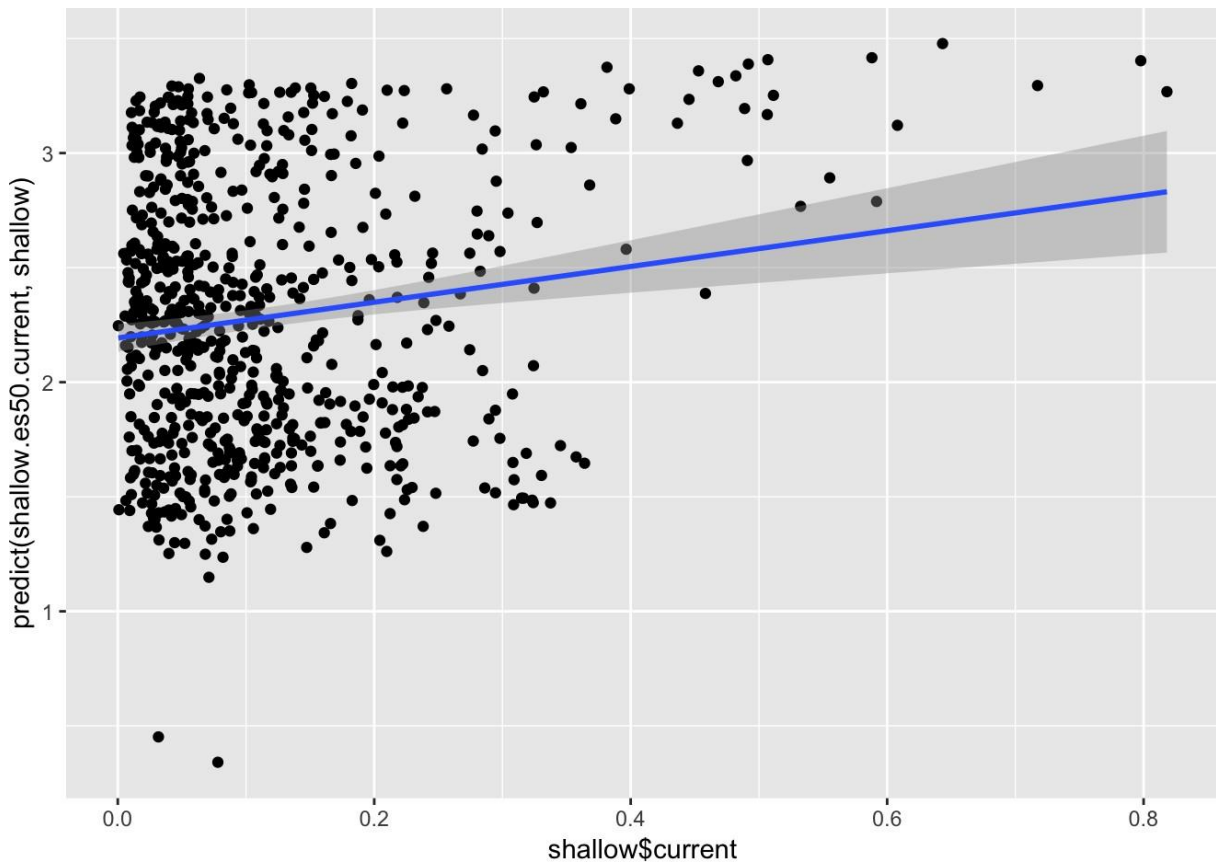

```
qplot(shallow$o2.saturate, predict(shallow.es50.o2.saturate, shallow)) + geom_smooth(
h(method = "gam")
```

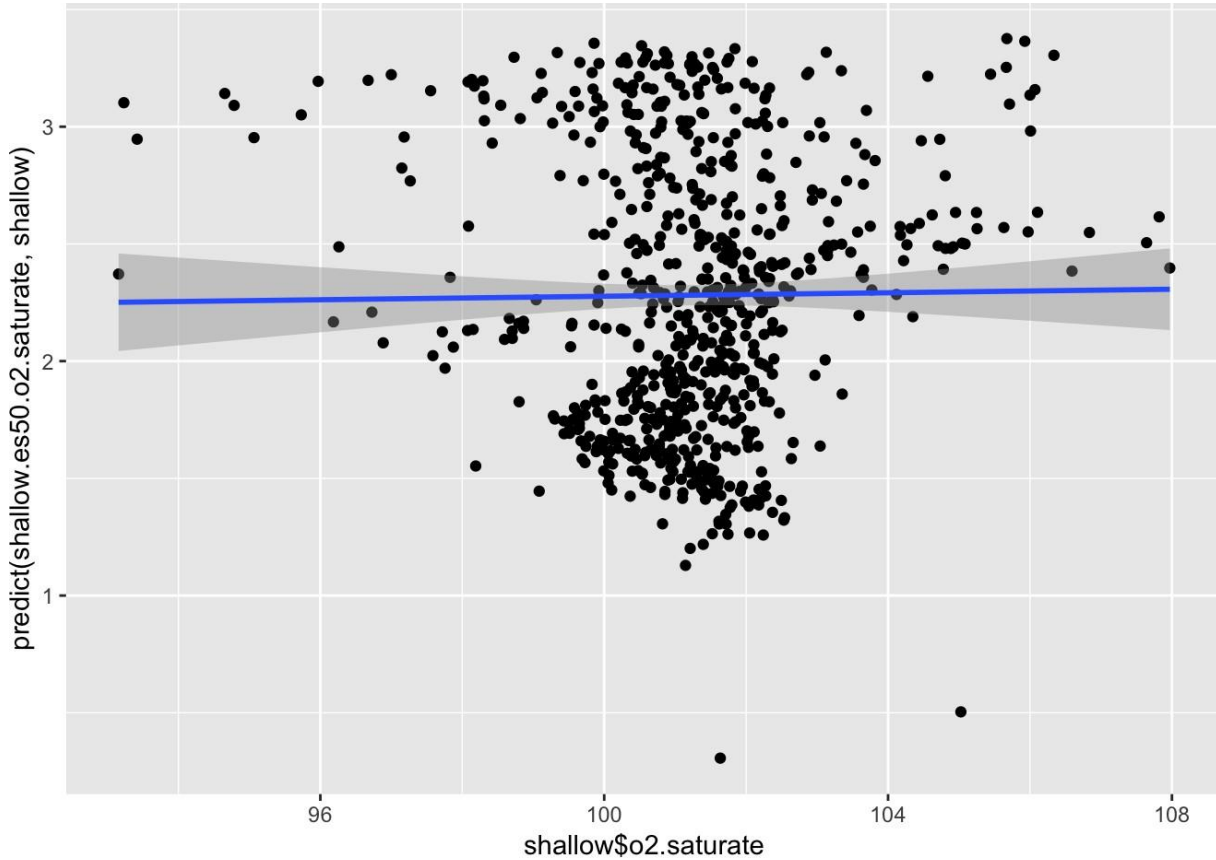

```
qplot(shallow$salinity, predict(shallow.es50.salinity, shallow)) + geom_smooth(meth
od = "gam")
```

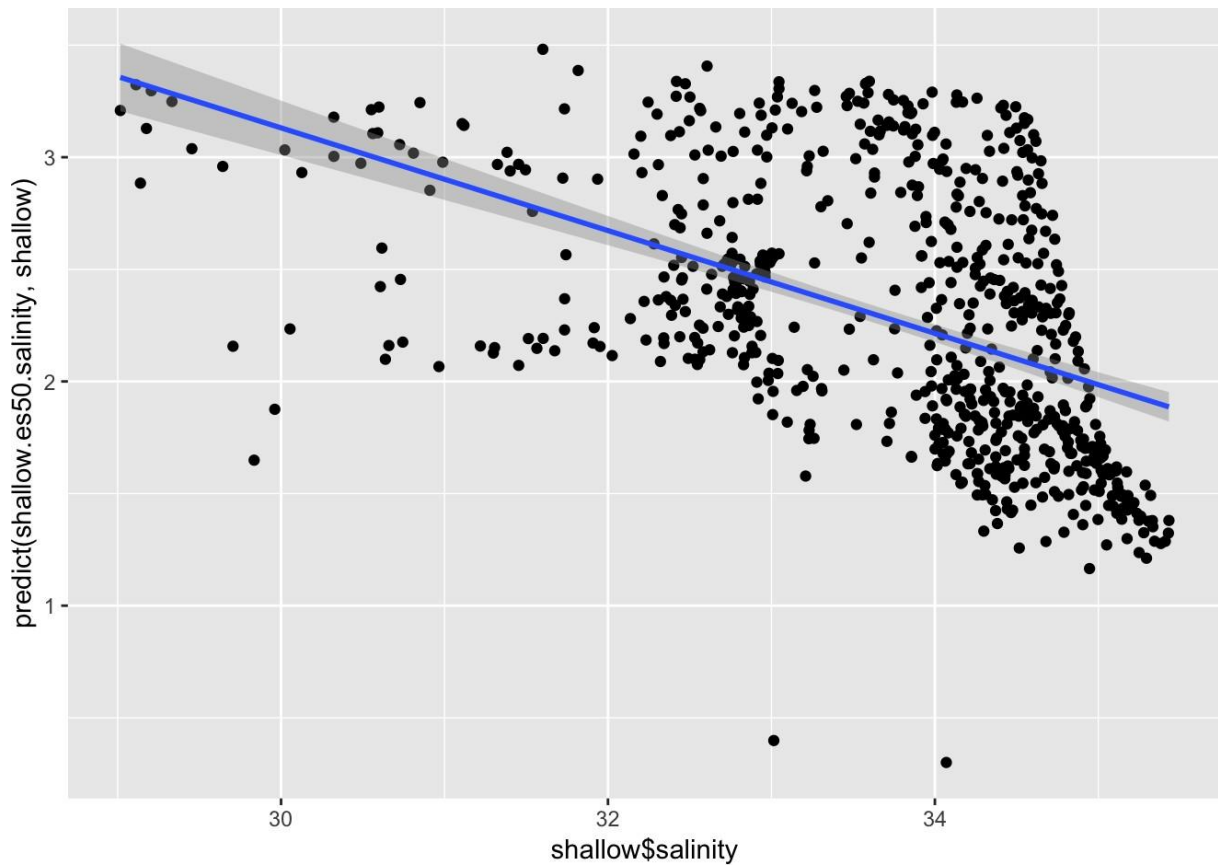

```
qplot(shallow$nitrate, predict(shallow.es50.nitrate, shallow)) + geom_smooth(method = "gam")
```

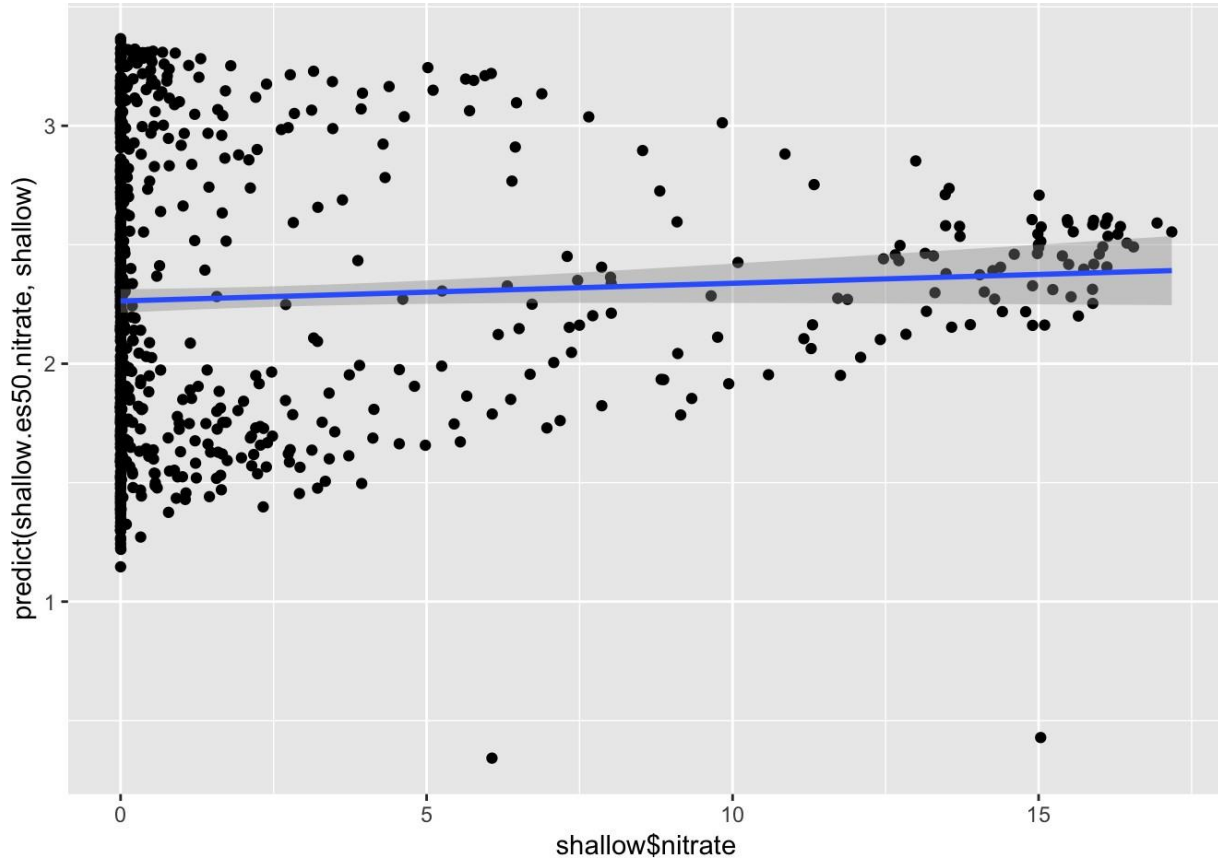

## Deep water

Repeating the above analyses for deep-dwelling species.

# Data load-in and visualization

```
deep <- read.csv("deep.csv")
analysis.cols <- c("lat", "lon", "area", "num.records", "num.species", "ES50", "dissolved.oxygen", "temp", "chlorophyll", "current", "salinity", "nitrate")
deep <- deep[,analysis.cols]
deep <- deep[complete.cases(deep),]
corrplot(cor(deep))
```

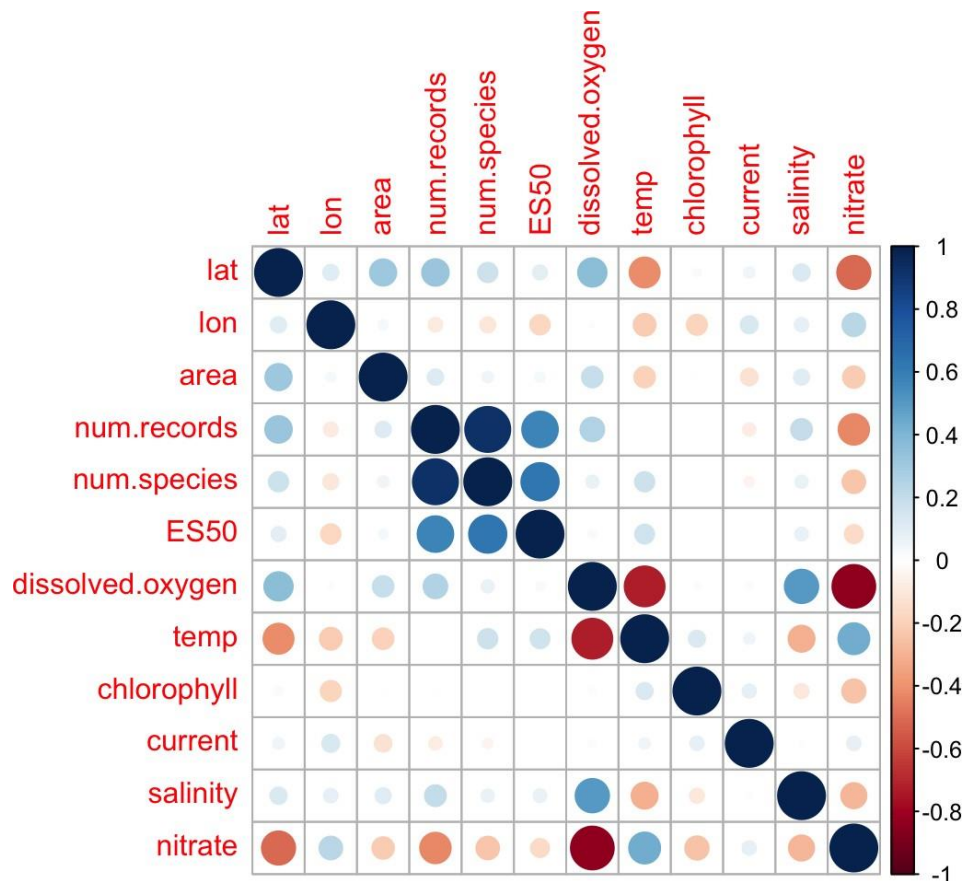

## GAMs for number of species, deep water

As above, we're going to develop a number of GAMs including one for "intercept", one for "latlon", one for all environmental predictors ("env"), and then one for each individual predictor.

```
deep.numsp.intercept <- gam(num.species ~ 1, data = deep, family = "nb", method = "REML", select = TRUE)
gam.check(deep.numsp.intercept)
```

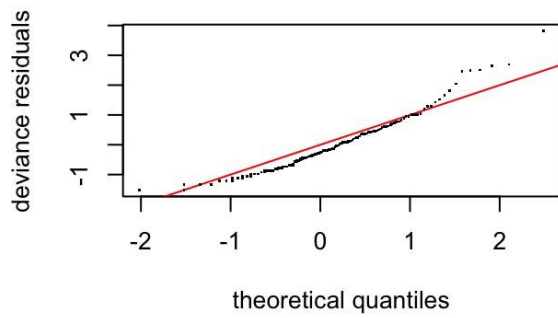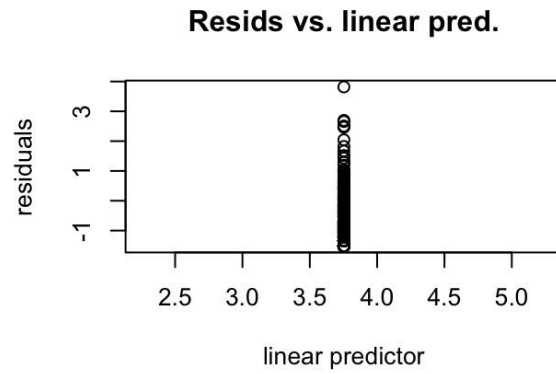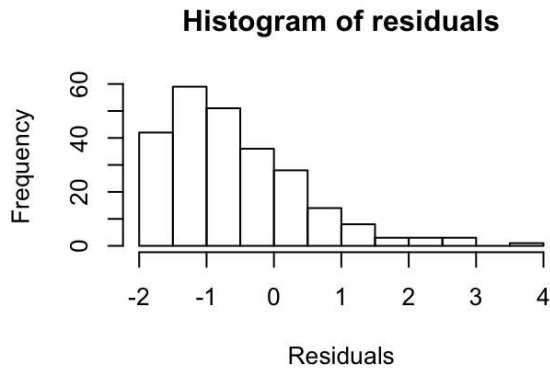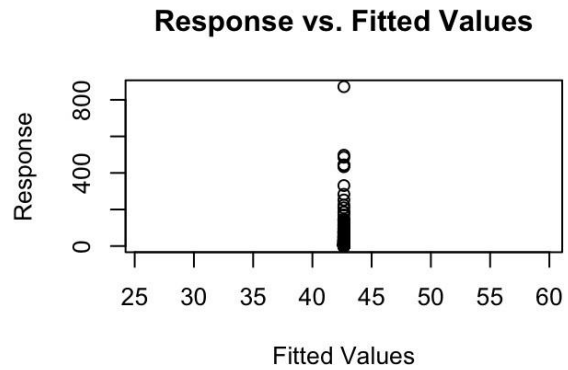

```
##
## Method: REML   Optimizer: outer newton
## full convergence after 4 iterations.
## Gradient range [1.064992e-07,1.064992e-07]
## (score 1115.547 & scale 1).
## Hessian positive definite, eigenvalue range [172.3917,172.3917].
## Model rank = 1 / 1
```

```
summary(deep.numsp.intercept)
```

```
##
## Family: Negative Binomial(0.446)
## Link function: log
##
## Formula:
## num.species ~ 1
##
## Parametric coefficients:
##           Estimate Std. Error z value Pr(>|z|)
## (Intercept)  3.75320    0.09555   39.28  <2e-16 ***
## ---
## Signif. codes:  0 '***' 0.001 '**' 0.01 '*' 0.05 '.' 0.1 ' ' 1
##
##
## R-sq.(adj) = 2.22e-16   Deviance explained = 1.42e-09%
## -REML = 1115.5   Scale est. = 1           n = 248
```

```

deep.numsp.numrec <- gam(num.species ~ s(num.records), data = deep, family = "nb",
  method = "REML", select = TRUE)
gam.check(deep.numsp.numrec)

```

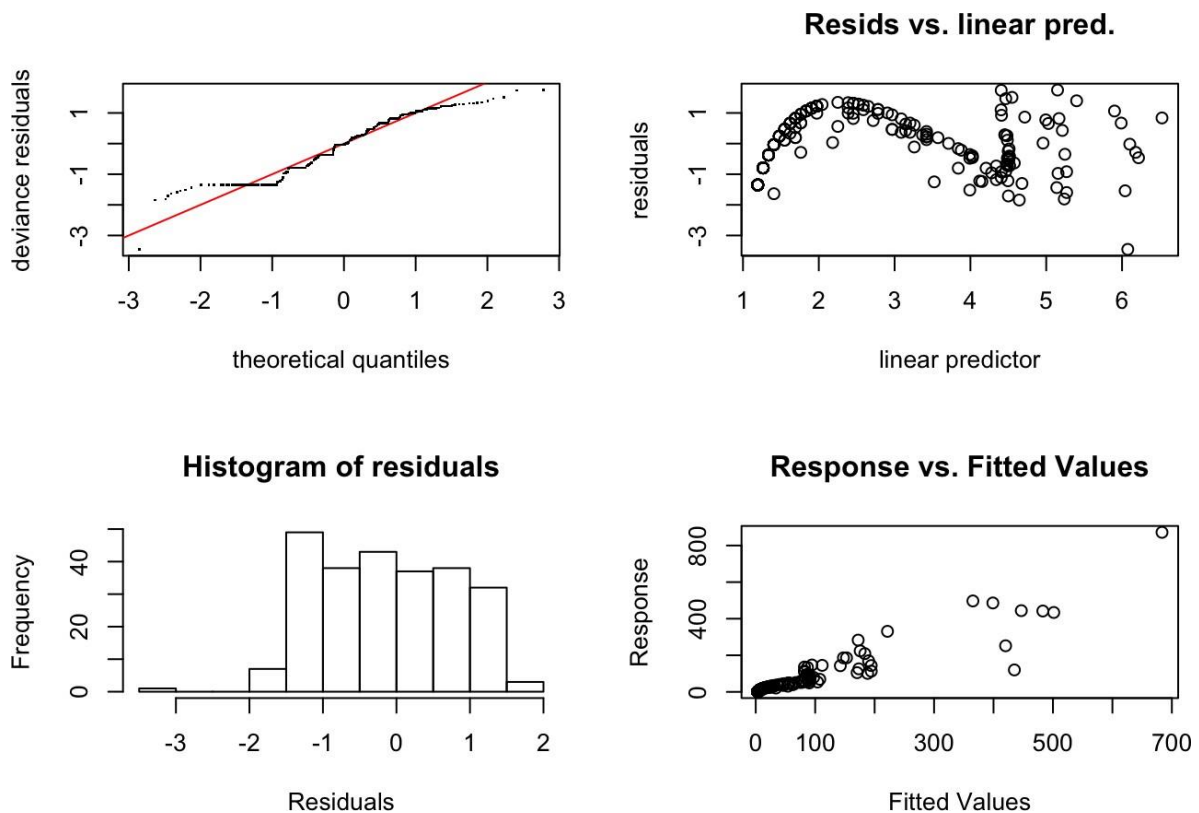

```

##
## Method: REML   Optimizer: outer newton
## full convergence after 5 iterations.
## Gradient range [-7.448098e-08,3.599384e-07]
## (score 789.128 & scale 1).
## Hessian positive definite, eigenvalue range [0.4809454,38.37389].
## Model rank = 10 / 10
##
## Basis dimension (k) checking results. Low p-value (k-index<1) may
## indicate that k is too low, especially if edf is close to k'.
##
##           k'   edf k-index p-value
## s(num.records) 9.00 8.69   0.27 <2e-16 ***
## ---
## Signif. codes:  0 '***' 0.001 '**' 0.01 '*' 0.05 '.' 0.1 ' ' 1

```

```
summary(deep.numsp.numrec)
```

```
##
## Family: Negative Binomial(11.031)
## Link function: log
##
## Formula:
## num.species ~ s(num.records)
##
## Parametric coefficients:
##             Estimate Std. Error z value Pr(>|z|)
## (Intercept)  2.52278    0.03118   80.91  <2e-16 ***
## ---
## Signif. codes:  0 '***' 0.001 '**' 0.01 '*' 0.05 '.' 0.1 ' ' 1
##
## Approximate significance of smooth terms:
##             edf Ref.df Chi.sq p-value
## s(num.records) 8.691     9  3245 <2e-16 ***
## ---
## Signif. codes:  0 '***' 0.001 '**' 0.01 '*' 0.05 '.' 0.1 ' ' 1
##
## R-sq.(adj) =  0.872   Deviance explained=95.3%
## -REML=789.13Scale est. = 1           n = 248
```

```
deep.numsp.latlon <- gam(num.species ~ s(lat, lon, bs = "sos") + s(num.records), data =
deep, family = "nb", method = "REML", select = TRUE) gam.check(deep.numsp.latlon)
```

**Resids vs. linear pred.**

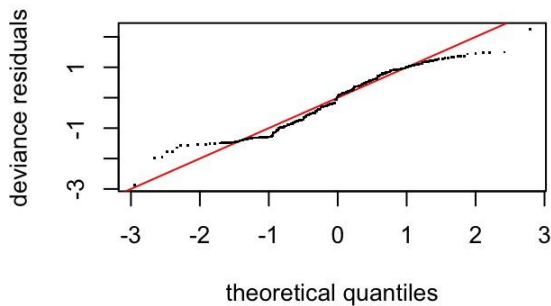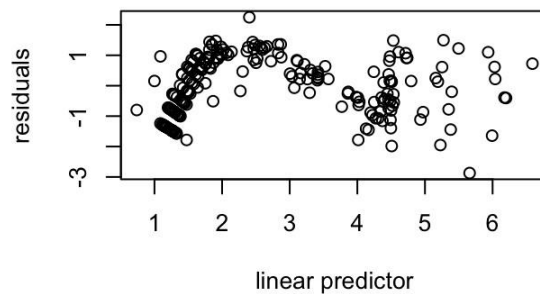

**Histogram of residuals**

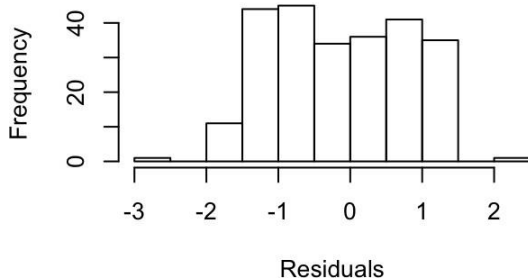

**Response vs. Fitted Values**

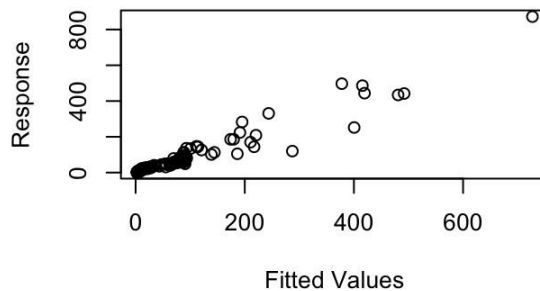

```
##
##Method:REML  Optimizer: outer newton
## full convergence after 13 iterations.
## Gradient range [-2.084442e-06,1.813092e-05]
## (score 783.3275 & scale 1).
## Hessian positive definite, eigenvalue range [0.4865975,26.20744].
## Model rank = 59 / 59
##
##Basis dimension (k) checking results. Low p-value (k-index<1) may
## indicate that k is too low, especially if edf is close to k'.
##
##           k'   edf k-index p-value
## s(lat,lon)   49.00  6.48   0.97   0.39
## s(num.records) 9.00  8.72   0.21 <2e-16 ***
## ---
## Signif. codes:  0 '***' 0.001 '**' 0.01 '*' 0.05 '.' 0.1 ' ' 1
```

```
summary(deep.numsp.latlon)
```

```
##
## Family: Negative Binomial(15.245)
## Link function: log
##
## Formula:
## num.species ~ s(lat, lon, bs = "sos") + s(num.records)
##
## Parametric coefficients:
##           Estimate Std. Error z value Pr(>|z|)
## (Intercept)  2.5224    0.0294   85.81 <2e-16 ***
## ---
## Signif. codes:  0 '***' 0.001 '**' 0.01 '*' 0.05 '.' 0.1 ' ' 1
##
## Approximate significance of smooth terms:
##           edf Ref.df  Chi.sq  p-value
## s(lat,lon)   6.482    49   28.61 4.42e-06 ***
## s(num.records) 8.721     9 3057.11 < 2e-16 ***
## ---
## Signif. codes:  0 '***' 0.001 '**' 0.01 '*' 0.05 '.' 0.1 ' ' 1
##
## R-sq.(adj) =  0.929  Deviance explained = 96.1%
## -REML= 783.33 Scale est. = 1          n = 248
```

```
deep.numsp.temp <- gam(num.species ~ s(lat, lon, bs = "sos") + s(num.records) + s(t
emp), data = deep, family = "nb", method = "REML", select = TRUE)
gam.check(deep.numsp.temp)
```



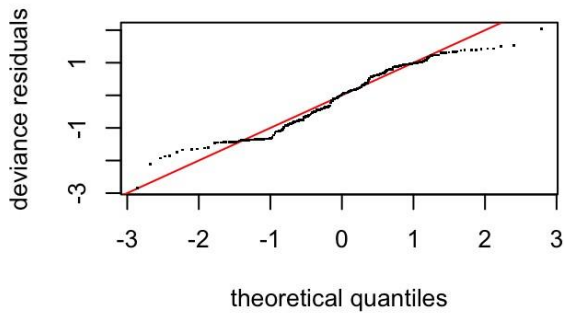

Resids vs. linear pred.

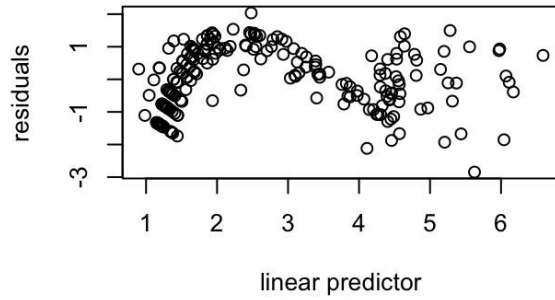

Histogram of residuals

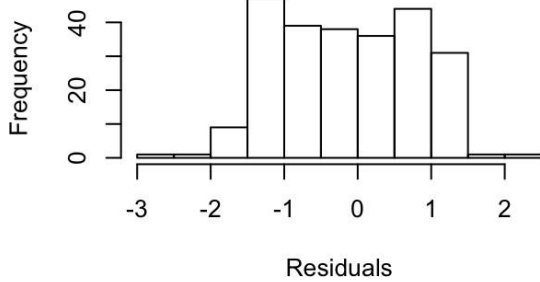

Response vs. Fitted Values

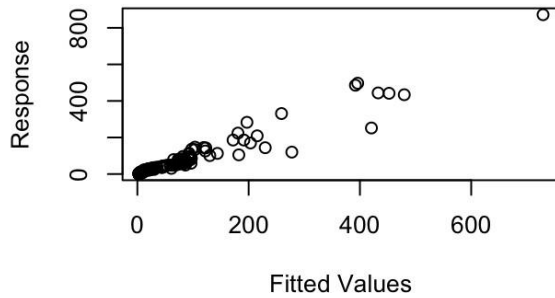

```
##
## Method: REML   Optimizer: outer newton
## full convergence after 16 iterations.
## Gradient range [-0.0001830443,0.0002958337]
## (score 779.4414 & scale 1).
## Hessian positive definite, eigenvalue range [0.1047609,25.92906].
## Model rank = 68 / 68
##
## Basis dimension (k) checking results. Low p-value (k-index<1) may
## indicate that k is too low, especially if edf is close to k'.
##
##           k'   edf k-index p-value
## s(lat,lon) 49.00 1.33  0.95  0.28
## s(num.records) 9.00 8.74  0.24 <2e-16 ***
## s(temp)     9.00 2.98  0.98  0.45
## ---
## Signif. codes:  0 '***' 0.001 '**' 0.01 '*' 0.05 '.' 0.1 ' ' 1
```

```
summary(deep.numsp.temp)
```

```
##
## Family: Negative Binomial(16.141)
## Link function: log
##
## Formula:
## num.species ~ s(lat, lon, bs = "sos") + s(num.records) + s(temp)
##
## Parametric coefficients:
##             Estimate Std. Error z value Pr(>|z|)
## (Intercept)  2.52107    0.02916   86.47  <2e-16 ***
## ---
## Signif. codes:  0 '***' 0.001 '**' 0.01 '*' 0.05 '.' 0.1 ' ' 1
##
## Approximate significance of smooth terms:
##             edf Ref.df   Chi.sq  p-value
## s(lat,lon)    1.327    49    1.931   0.175
## s(num.records) 8.739     9 3286.489 < 2e-16 ***
## s(temp)       2.977     9   24.634 1.36e-06 ***
## ---
## Signif. codes:  0 '***' 0.001 '**' 0.01 '*' 0.05 '.' 0.1 ' ' 1
##
## R-sq.(adj) =  0.932   Deviance explained=96.2%
## -REML=779.44Scale est. = 1             n = 248
```

```
deep.numsp.oxygen <- gam(num.species ~ s(lat, lon, bs = "sos") + s(num.records) +
s(dissolved.oxygen), data = deep, family = "nb", method = "REML", select = TRUE)
gam.check(deep.numsp.oxygen)
```

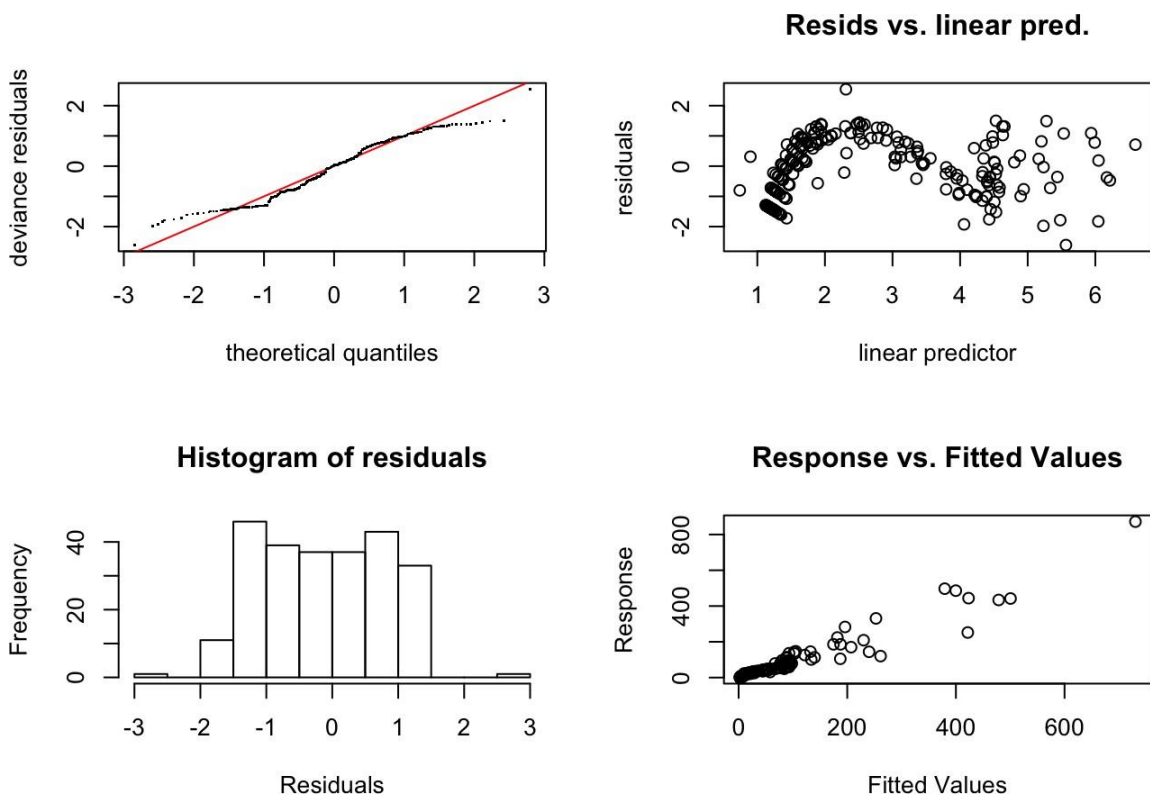

```
##
##Method:REML Optimizer: outer newton
## full convergence after 15 iterations.
## Gradient range [-4.828611e-06,3.365376e-06]
## (score 778.8793 & scale 1).
## Hessian positive definite, eigenvalue range [0.07966418,27.44467].
## Model rank = 68 / 68
##
##Basis dimension (k) checking results. Low p-value (k-index<1) may
## indicate that k is too low, especially if edf is close to k'.
##
##              k'   edf k-index p-value
## s(lat,lon)      49.000  0.899   0.96   0.36
## s(num.records)   9.000  8.740   0.21 <2e-16 ***
## s(dissolved.oxygen) 9.000  1.799   0.97   0.49
## ---
## Signif. codes:  0 '***' 0.001 '**' 0.01 '*' 0.05 '.' 0.1 ' ' 1
```

```
summary(deep.numsp.oxygen)
```

```
##
## Family: Negative Binomial(15.476)
## Link function: log
##
## Formula:
## num.species ~ s(lat, lon, bs = "sos") + s(num.records) + s(dissolved.oxygen)
##
## Parametric coefficients:
##              Estimate Std. Error z value Pr(>|z|)
## (Intercept)  2.5228     0.0293   86.1 <2e-16 ***
## ---
## Signif. codes:  0 '***' 0.001 '**' 0.01 '*' 0.05 '.' 0.1 ' ' 1
##
## Approximate significance of smooth terms:
##              edf Ref.df  Chi.sq  p-value
## s(lat,lon)      0.8991    49   1.285   0.178
## s(num.records)   8.7404     9 3329.104 < 2e-16 ***
## s(dissolved.oxygen) 1.7995     9  23.743 2.24e-07 ***
## ---
## Signif. codes:  0 '***' 0.001 '**' 0.01 '*' 0.05 '.' 0.1 ' ' 1
##
## R-sq.(adj) =  0.929  Deviance explained = 96.1%
## -REML= 778.88 Scale est. = 1          n = 248
```

```
deep.numsp.chlorophyll <- gam(num.species ~ s(lat, lon, bs = "sos") + s(num.record
s) + s(chlorophyll), data = deep, family = "nb", method = "REML", select = TRUE)
gam.check(deep.numsp.chlorophyll)
```

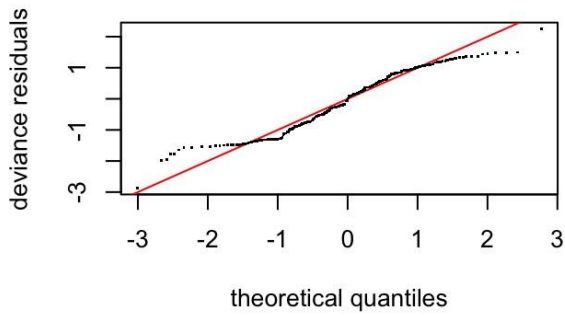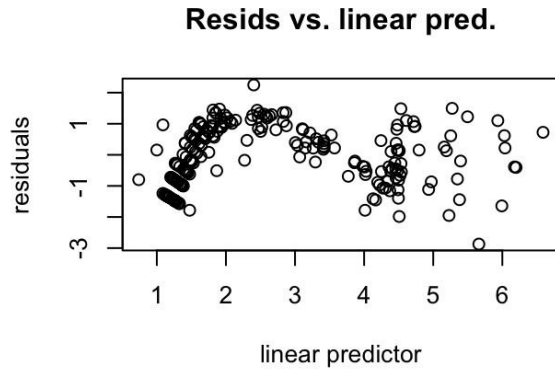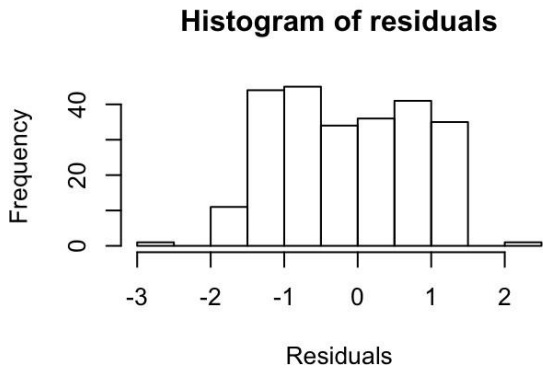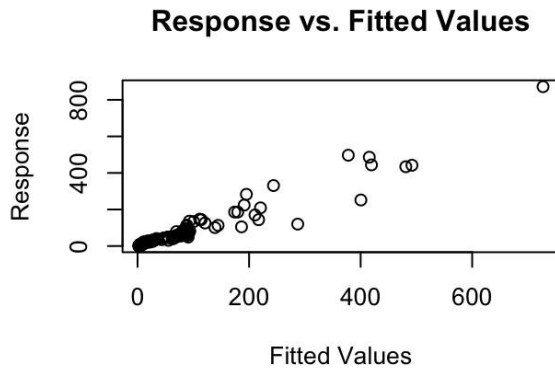

```
##
## Method: REML   Optimizer: outer newton
## full convergence after 14 iterations.
## Gradient range [-1.60812e-05,3.281463e-06]
## (score 783.3275 & scale 1).
## Hessian positive definite, eigenvalue range [1.238047e-05,26.20742].
## Model rank = 68 / 68
##
## Basis dimension (k) checking results. Low p-value (k-index<1) may
## indicate that k is too low, especially if edf is close to k'.
##
##           k'      edf k-index p-value
## s(lat,lon)  4.90e+01 6.48e+00   0.97   0.40
## s(num.records) 9.00e+00 8.72e+00   0.21 <2e-16 ***
## s(chlorophyll) 9.00e+00 9.72e-05   0.99   0.54
## ---
## Signif. codes:  0 '***' 0.001 '**' 0.01 '*' 0.05 '.' 0.1 ' ' 1
```

```
summary(deep.numsp.chlorophyll)
```

```
##
## Family: Negative Binomial(15.245)
## Link function: log
##
## Formula:
## num.species ~ s(lat, lon, bs = "sos") + s(num.records) + s(chlorophyll)
##
## Parametric coefficients:
##             Estimate Std. Error z value Pr(>|z|)
## (Intercept)  2.5224    0.0294  85.81 <2e-16 ***
## ---
## Signif. codes:  0 '***' 0.001 '**' 0.01 '*' 0.05 '.' 0.1 ' ' 1
##
## Approximate significance of smooth terms:
##             edf Ref.df Chi.sq p-value
## s(lat,lon)    6.482e+00   49  28.61 4.42e-06 ***
## s(num.records) 8.721e+00    9 3057.11 < 2e-16 ***
## s(chlorophyll) 9.717e-05    9  0.00 0.535
## ---
## Signif. codes:  0 '***' 0.001 '**' 0.01 '*' 0.05 '.' 0.1 ' ' 1
##
## R-sq.(adj) =  0.929   Deviance explained = 96.1%
## -REML=783.33Scale est. = 1             n = 248
```

```
deep.numsp.current <- gam(num.species ~ s(lat, lon, bs = "sos") + s(num.records) +
s(current), data = deep, family = "nb", method = "REML", select = TRUE)
gam.check(deep.numsp.current)
```

**Resids vs. linear pred.**

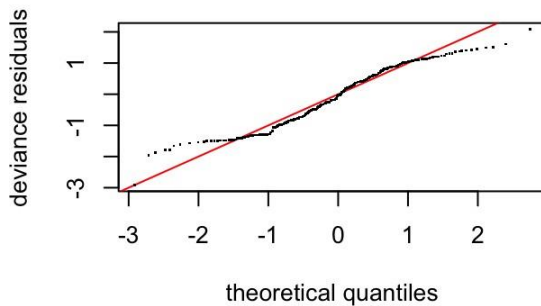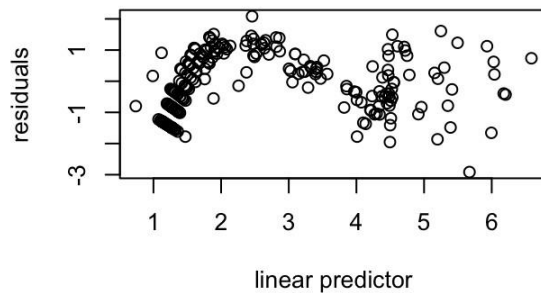

**Histogram of residuals**

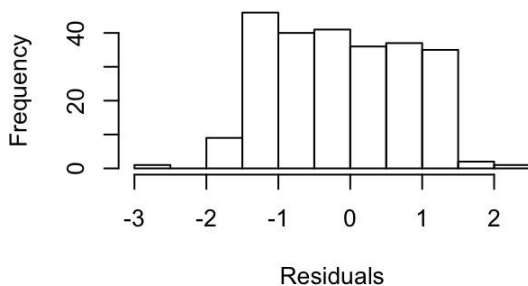

**Response vs. Fitted Values**

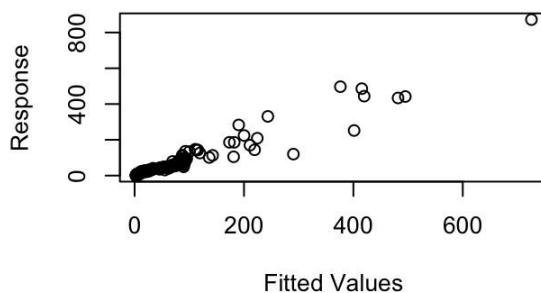

```
##
## Method: REML   Optimizer: outer newton
## full convergence after 12 iterations.
## Gradient range [-7.866149e-05,0.0006824098]
## (score 783.122 & scale 1).
## Hessian positive definite, eigenvalue range [3.296297e-05,26.16876].
## Model rank = 68 / 68
##
## Basis dimension (k) checking results. Low p-value (k-index<1) may
## indicate that k is too low, especially if edf is close to k'.
##
##           k'   edf k-index p-value
## s(lat,lon) 49.000 6.353   0.97   0.35
## s(num.records) 9.000 8.720   0.21 <2e-16 ***
## s(current)  9.000 0.708   0.98   0.54
## ---
## Signif. codes:  0 '***' 0.001 '**' 0.01 '*' 0.05 '.' 0.1 ' ' 1
```

```
summary(deep.numsp.current)
```

```
##
## Family: Negative Binomial(15.378)
## Link function: log
##
## Formula:
## num.species ~ s(lat, lon, bs = "sos") + s(num.records) + s(current)
##
## Parametric coefficients:
##           Estimate Std. Error z value Pr(>|z|)
## (Intercept) 2.52214    0.02936  85.91 <2e-16 ***
## ---
## Signif. codes:  0 '***' 0.001 '**' 0.01 '*' 0.05 '.' 0.1 ' ' 1
##
## Approximate significance of smooth terms:
##           edf Ref.df  Chi.sq p-value
## s(lat,lon)  6.3530    49  28.396 3.48e-06 ***
## s(num.records) 8.7198     9 3072.017 < 2e-16 ***
## s(current)   0.7081     9   1.351  0.139
## ---
## Signif. codes:  0 '***' 0.001 '**' 0.01 '*' 0.05 '.' 0.1 ' ' 1
##
## R-sq.(adj) = 0.928   Deviance explained = 96.2%
## -REML=783.12Scale est. = 1           n = 248
```

```
deep.numsp.salinity <- gam(num.species ~ s(lat, lon, bs = "sos") + s(num.records) +
s(salinity), data = deep, family = "nb", method = "REML", select = TRUE)
gam.check(deep.numsp.salinity)
```

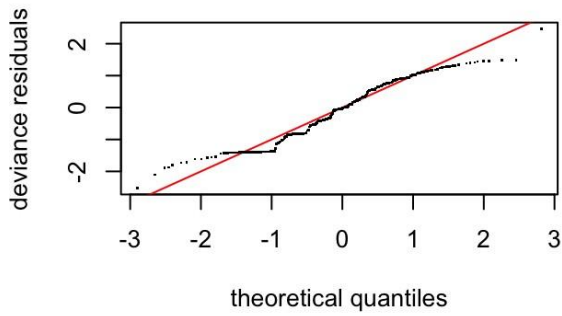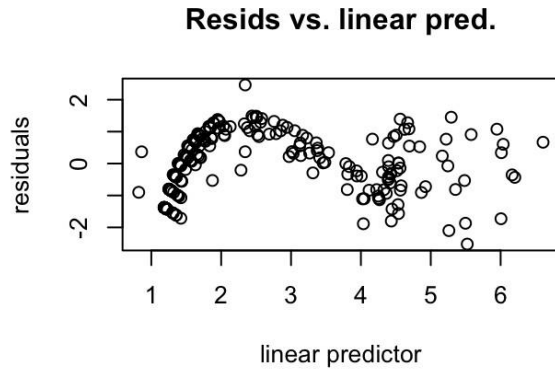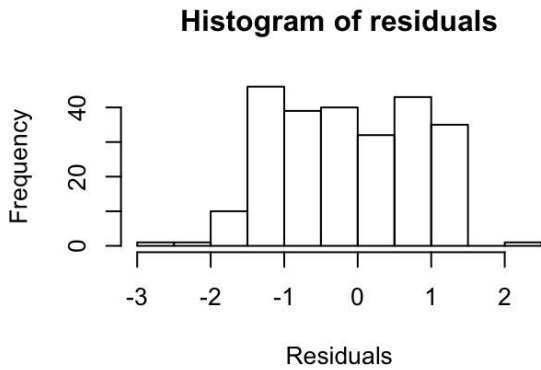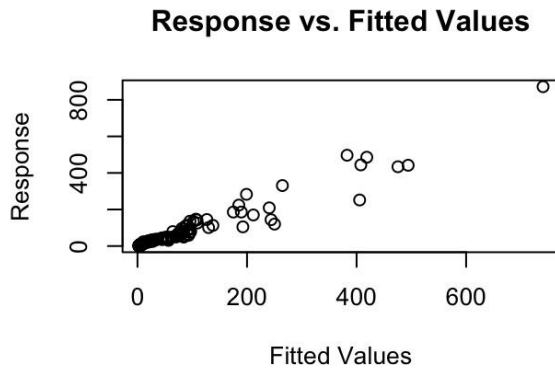

```
##
## Method: REML  Optimizer: outer newton
## full convergence after 19 iterations.
## Gradient range [-4.890114e-05,6.436646e-05]
## (score 778.6788 & scale 1).
## Hessian positive definite, eigenvalue range [4.896408e-05,26.32655].
## Model rank = 68 / 68
##
## Basis dimension (k) checking results. Low p-value (k-index<1) may
## indicate that k is too low, especially if edf is close to k'.
##
##           k'      edf k-index p-value
## s(lat,lon) 49.00000 0.00062  0.95  0.32
## s(num.records) 9.00000 8.74747  0.19 <2e-16 ***
## s(salinity)  9.00000 2.76874  0.92  0.20
## ---
## Signif. codes:  0 '***' 0.001 '**' 0.01 '*' 0.05 '.' 0.1 ' ' 1
```

```
summary(deep.numsp.salinity)
```

```
##
## Family: Negative Binomial(16.098)
## Link function: log
##
## Formula:
## num.species ~ s(lat, lon, bs = "sos") + s(num.records) + s(salinity)
##
## Parametric coefficients:
##             Estimate Std. Error z value Pr(>|z|)
## (Intercept)  2.52442   0.02907  86.83 <2e-16 ***
## ---
## Signif. codes:  0 '***' 0.001 '**' 0.01 '*' 0.05 '.' 0.1 ' ' 1
##
## Approximate significance of smooth terms:
##             edf Ref.df  Chi.sq p-value
## s(lat,lon)    0.0006202   49   0.001 0.391
## s(num.records) 8.7474679    9 3390.383 < 2e-16 ***
## s(salinity)   2.7687403    9  35.507 6.42e-09 ***
## ---
## Signif. codes:  0 '***' 0.001 '**' 0.01 '*' 0.05 '.' 0.1 ' ' 1
##
## R-sq.(adj) =  0.936   Deviance explained = 96.2%
## -REML= 778.68 Scale est. = 1           n = 248
```

```
deep.numsp.nitrate <- gam(num.species ~ s(lat, lon, bs = "sos") + s(num.records) +
s(nitrate), data = deep, family = "nb", method = "REML", select = TRUE)
gam.check(deep.numsp.nitrate)
```

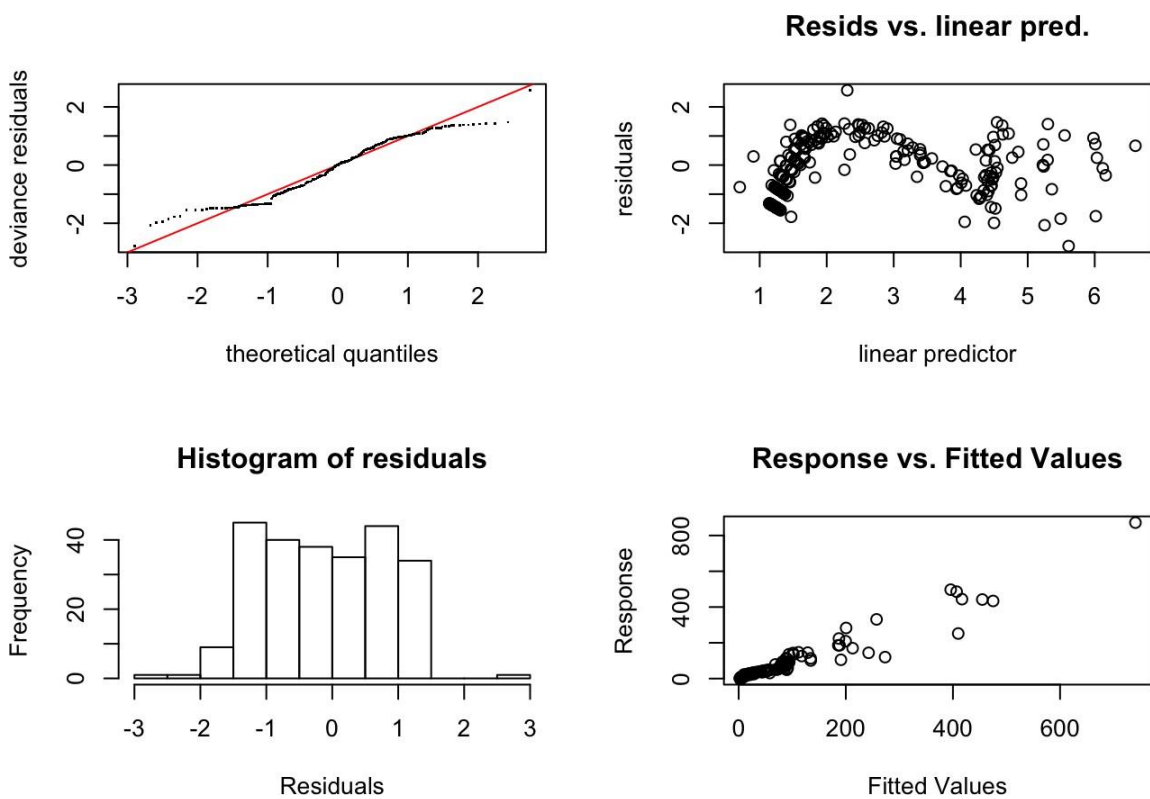



```
##
## Method: REML  Optimizer: outer newton
## full convergence after 15 iterations.
## Gradient range [-0.000171565,7.103026e-05]
## (score 778.9375 & scale 1).
## Hessian positive definite, eigenvalue range[0.000171518,26.49127].
## Model rank = 68 / 68
##
## Basis dimension (k) checking results. Low p-value (k-index<1) may
## indicate that k is too low, especially if edf is close to k'.
##
##           k'   edf k-index p-value
## s(lat,lon) 49.000 2.016   0.96   0.28
## s(num.records) 9.000 8.742   0.22 <2e-16 ***
## s(nitrate)  9.000 0.946   0.93   0.22
## ---
## Signif. codes:  0 '***' 0.001 '**' 0.01 '*' 0.05 '.' 0.1 ' ' 1
```

```
summary(deep.numsp.nitrate)
```

```
##
## Family: Negative Binomial(15.952)
## Link function: log
##
## Formula:
## num.species ~ s(lat, lon, bs = "sos") + s(num.records) + s(nitrate)
##
## Parametric coefficients:
##           Estimate Std. Error z value Pr(>|z|)
## (Intercept) 2.52313   0.02915  86.56 <2e-16 ***
## ---
## Signif. codes:  0 '***' 0.001 '**' 0.01 '*' 0.05 '.' 0.1 ' ' 1
##
## Approximate significance of smooth terms:
##           edf Ref.df  Chi.sq p-value
## s(lat,lon)  2.0160   49  4.562  0.0495 *
## s(num.records) 8.7424    9 3467.571 < 2e-16 ***
## s(nitrate)   0.9461    9  17.430 1.87e-06 ***
## ---
## Signif. codes:  0 '***' 0.001 '**' 0.01 '*' 0.05 '.' 0.1 ' ' 1
##
## R-sq.(adj) = 0.935  Deviance explained = 96.2%
## -REML= 778.94 Scale est. = 1          n = 248
```

```
deep.numsp.env <- gam(num.species ~ s(lat, lon, bs = "sos") + s(num.records) + s(tem
p) + s(dissolved.oxygen) + s(chlorophyll) + s(current) + s(salinity) + s(nitrat e),
data = deep, family = "nb", method = "REML", select = TRUE)
gam.check(deep.numsp.env)
```

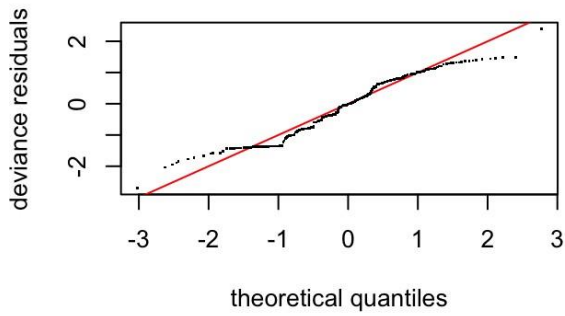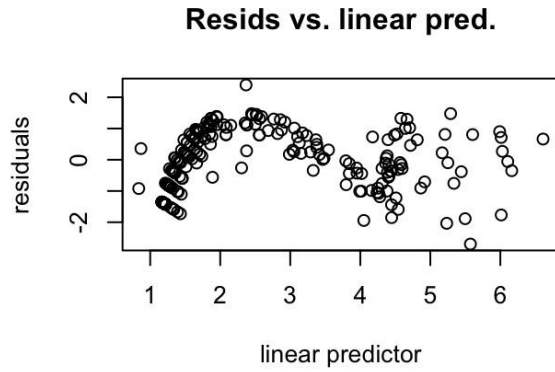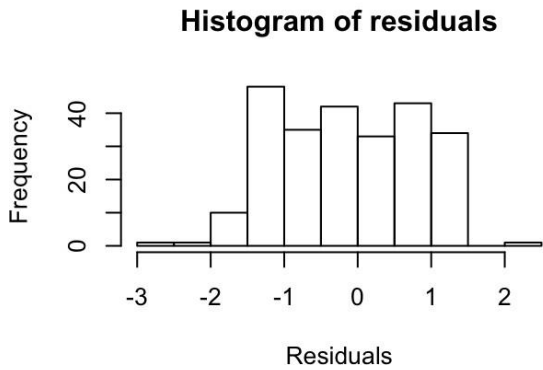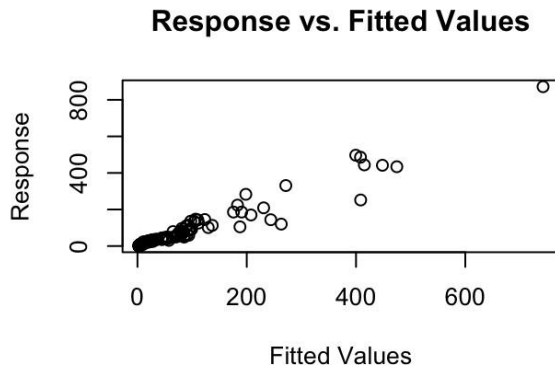

```
##
## Method: REML  Optimizer: outer newton
## full convergence after 13 iterations.
## Gradient range [-0.0003393487,0.0001655968]
## (score 778.3568 & scale 1).
## eigenvalue range [-3.960114e-05,26.01022].
## Model rank = 113 / 113
##
## Basis dimension (k) checking results. Low p-value (k-index<1) may
## indicate that k is too low, especially if edf is close to k'.
##
##          k'      edf k-index p-value
## s(lat,lon)  4.90e+01 5.61e-01  0.96  0.33
## s(num.records)  9.00e+00 8.74e+00  0.21 <2e-16 ***
## s(temp)      9.00e+00 1.29e+00  0.99  0.51
## s(dissolved.oxygen) 9.00e+00 2.50e-04  0.99  0.55
## s(chlorophyll) 9.00e+00 2.23e-04  1.00  0.63
## s(current)   9.00e+00 1.33e-01  0.96  0.37
## s(salinity)  9.00e+00 2.34e+00  0.93  0.18
## s(nitrate)   9.00e+00 3.97e-04  0.94  0.30
## ---
## Signif. codes:  0 '***' 0.001 '**' 0.01 '*' 0.05 '.' 0.1 ' ' 1
```

```
summary(deep.numsp.env)
```

```

##
## Family: Negative Binomial(16.363)
## Link function: log
##
## Formula:
## num.species ~ s(lat, lon, bs = "sos") + s(num.records) + s(temp) +
##   s(dissolved.oxygen) + s(chlorophyll) + s(current) + s(salinity) +
##   s(nitrate)
##
## Parametric coefficients:
##           Estimate Std. Error z value Pr(>|z|)
## (Intercept)  2.52257    0.02904   86.86  <2e-16 ***
## ---
## Signif. codes:  0 '***' 0.001 '**' 0.01 '*' 0.05 '.' 0.1 ' ' 1
##
## Approximate significance of smooth terms:
##           edf Ref.df   Chi.sq  p-value
## s(lat,lon)    0.5611688    49    0.730 0.206615
## s(num.records) 8.7441673     9 3279.706  < 2e-16 ***
## s(temp)       1.2898582     9    3.262 0.048569 *
## s(dissolved.oxygen) 0.0002496     9    0.000 0.479536
## s(chlorophyll) 0.0002232     9    0.000 0.751210
## s(current)    0.1331032     9    0.150 0.277828
## s(salinity)   2.3436500     9   12.671 0.000285 ***
## s(nitrate)    0.0003972     9    0.000 0.507870
## ---
## Signif. codes:  0 '***' 0.001 '**' 0.01 '*' 0.05 '.' 0.1 ' ' 1
##
## R-sq.(adj) =  0.938   Deviance explained = 96.3%
## -REML = 778.36 Scale est. = 1           n = 248

```

## Model selection for number of species, deep water

```

deep.numsp.models <- list(deep.numsp.intercept = deep.numsp.intercept,
                          deep.numsp.numrec = deep.numsp.numrec,
                          deep.numsp.latlon = deep.numsp.latlon,
                          deep.numsp.temp = deep.numsp.temp,
                          deep.numsp.oxygen = deep.numsp.oxygen,
                          deep.numsp.chlorophyll = deep.numsp.chlorophyll,
                          deep.numsp.current = deep.numsp.current,
                          deep.numsp.salinity = deep.numsp.salinity,
                          deep.numsp.nitrate = deep.numsp.nitrate,
                          deep.numsp.env = deep.numsp.env)
deep.numsp.aic.df <- data.frame(Model = names(deep.numsp.models),
                               AIC = sapply(deep.numsp.models, function(x) x$aic),
                               akaike.weights(sapply(deep.numsp.models, function(x) x
$aic)))

deep.numsp.aic.df <- deep.numsp.aic.df[order(deep.numsp.aic.df$AIC),]
deep.numsp.aic.df$Cumulative.Weight <- cumsum(deep.numsp.aic.df$weights)

kable(deep.numsp.aic.df, row.names = FALSE)

```

| Model                  | AIC      | deltaAIC    | rel.LL    | weights   | Cumulative.Weight |
|------------------------|----------|-------------|-----------|-----------|-------------------|
| deep.numsp.env         | 1503.752 | 0.0000000   | 1.0000000 | 0.3916404 | 0.3916404         |
| deep.numsp.salinity    | 1504.519 | 0.7670844   | 0.6814433 | 0.2668807 | 0.6585211         |
| deep.numsp.temp        | 1505.273 | 1.5213809   | 0.4673436 | 0.1830306 | 0.8415517         |
| deep.numsp.oxygen      | 1507.051 | 3.2996823   | 0.1920804 | 0.0752264 | 0.9167781         |
| deep.numsp.nitrate     | 1507.071 | 3.3192946   | 0.1902061 | 0.0744924 | 0.9912705         |
| deep.numsp.current     | 1513.226 | 9.4747427   | 0.0087616 | 0.0034314 | 0.9947019         |
| deep.numsp.latlon      | 1513.744 | 9.9923088   | 0.0067639 | 0.0026490 | 0.9973510         |
| deep.numsp.chlorophyll | 1513.744 | 9.9924113   | 0.0067636 | 0.0026489 | 0.9999998         |
| deep.numsp.numrec      | 1533.111 | 29.3590199  | 0.0000004 | 0.0000002 | 1.0000000         |
| deep.numsp.intercept   | 2230.235 | 726.4832924 | 0.0000000 | 0.0000000 | 1.0000000         |

```
write.csv(deep.numsp.aic.df, file = "deep.numsp.aic.csv")
```

We find that the best model is the one that contains all environmental predictor variables. The second best model is one that contains only the effects of oxygen, but the delta AIC between that model and the best model is 7.18, indicating that the oxygen-only model is a relatively poor fit to the data. We find strong evidence that the “env” model outperforms the model using spatial autocorrelation alone (delta AIC = 10.18).

## Plots for number of species, deep water

```
qplot(deep$temp, predict(deep.numsp.temp, deep)) + geom_smooth(method = "gam")
```

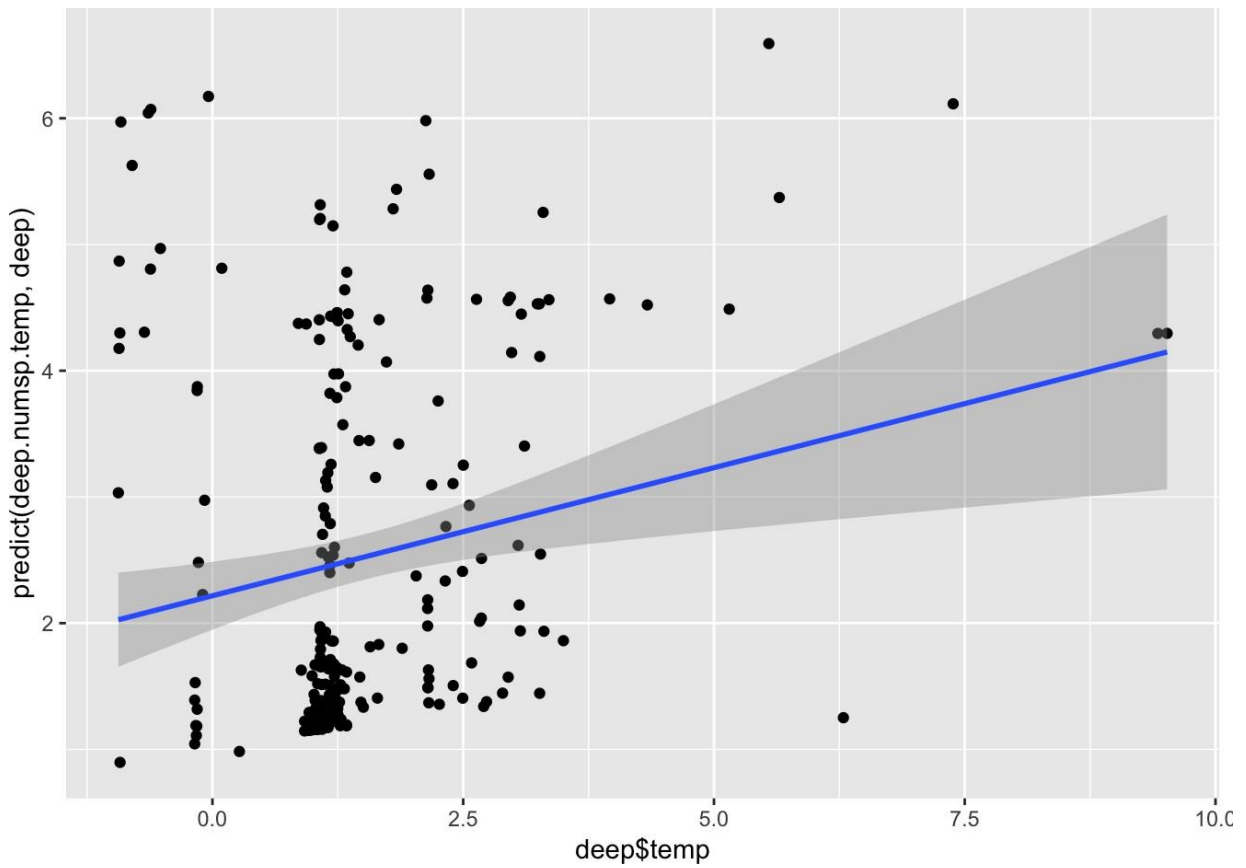

```
qplot(deep$dissolved.oxygen, predict(deep.numsp.oxygen, deep)) + geom_smooth(method = "gam")
```

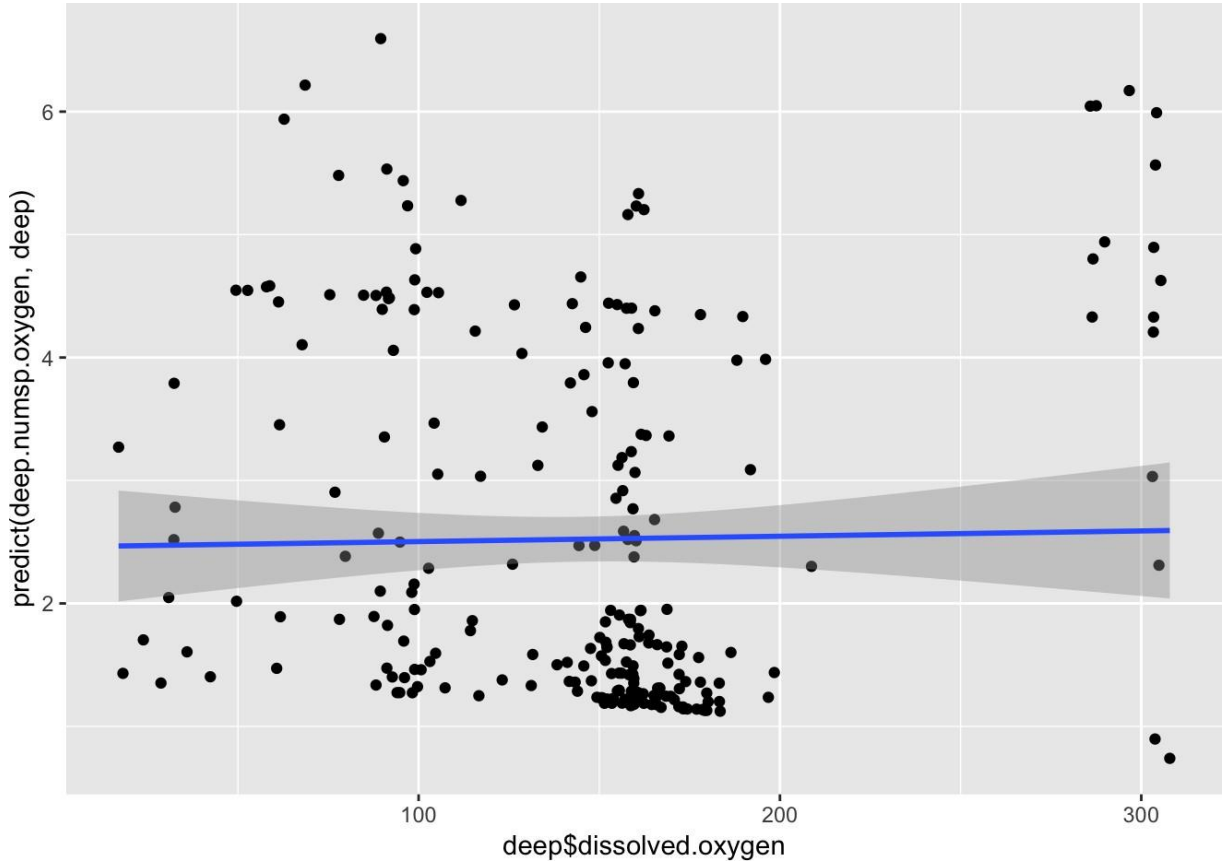

```
qplot(deep$chlorophyll, predict(deep.numsp.chlorophyll, deep)) + geom_smooth(method = "gam")
```

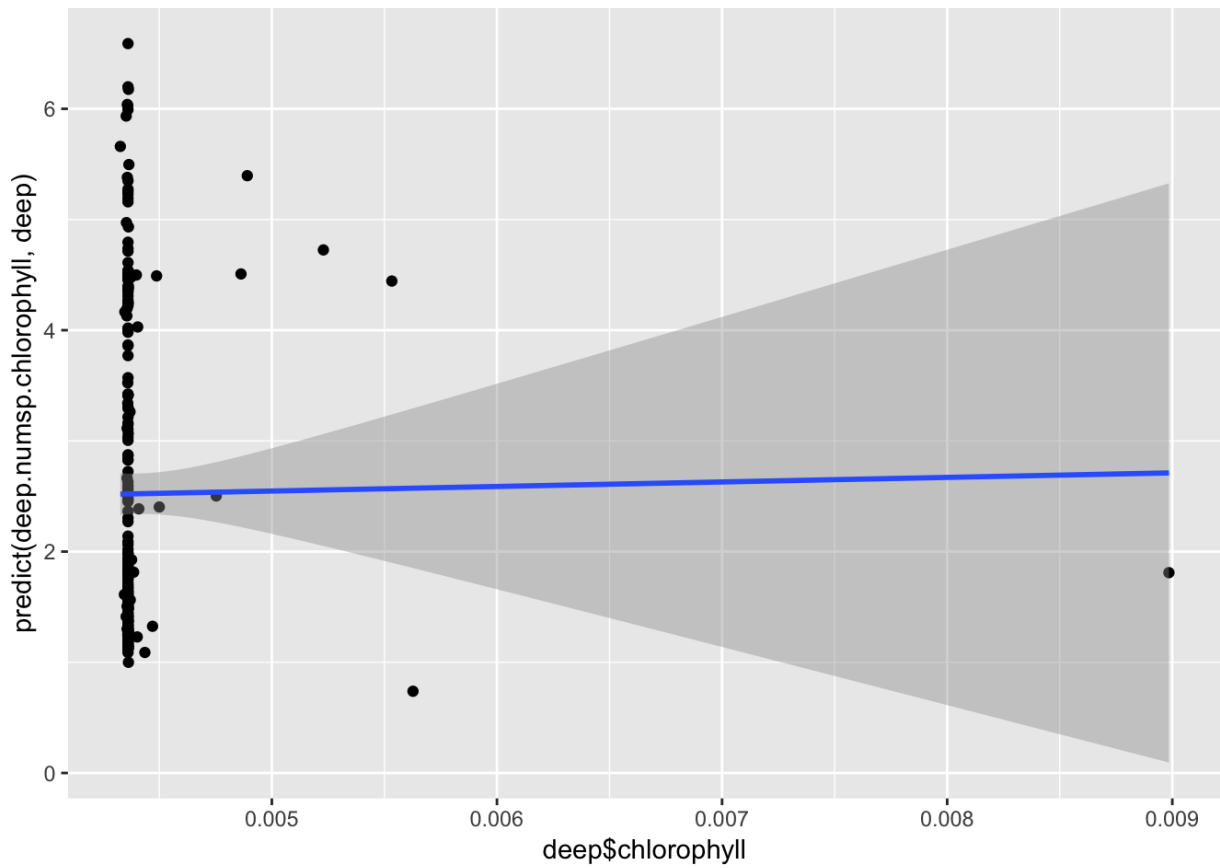

```
qplot(deep$current, predict(deep.numsp.current, deep)) + geom_smooth(method = "gam")
)
```

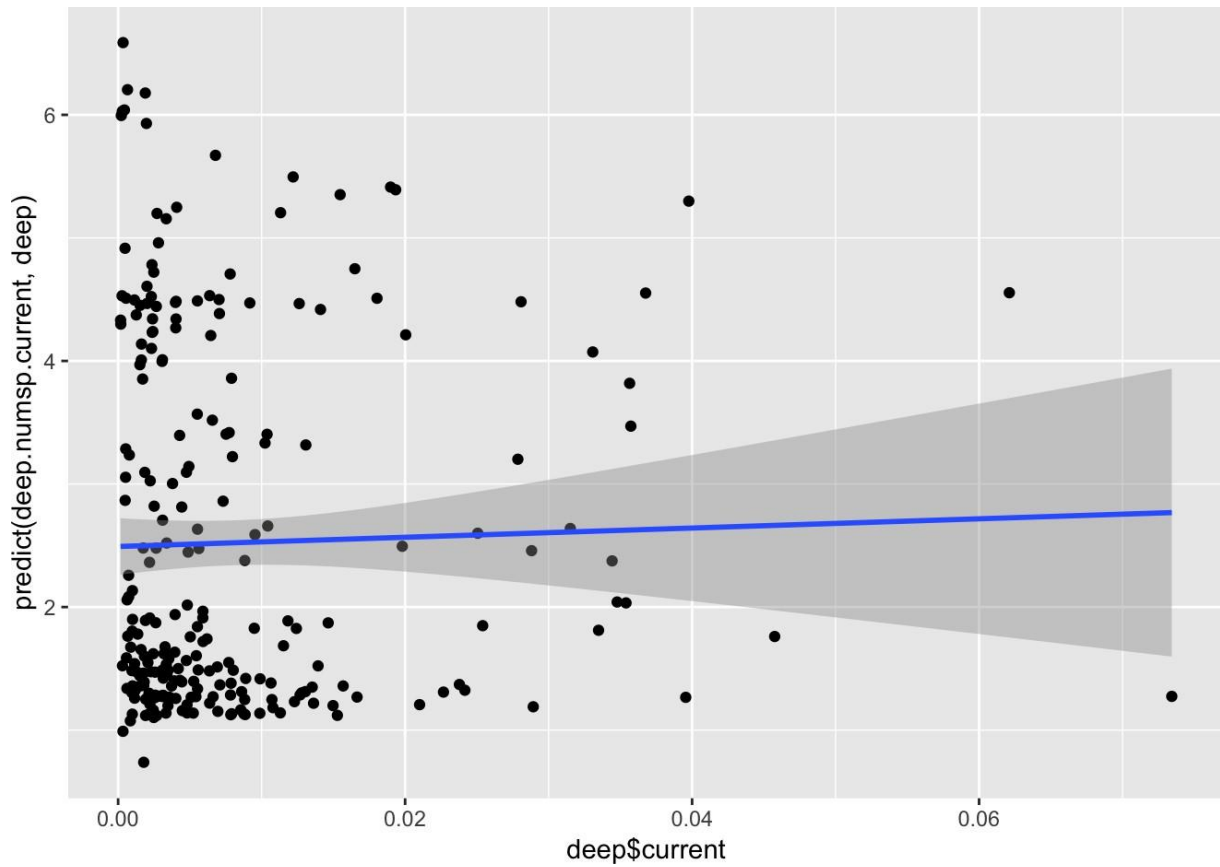

```
qplot(deep$salinity, predict(deep.numsp.salinity, deep)) + geom_smooth(method = "gam")
)
```

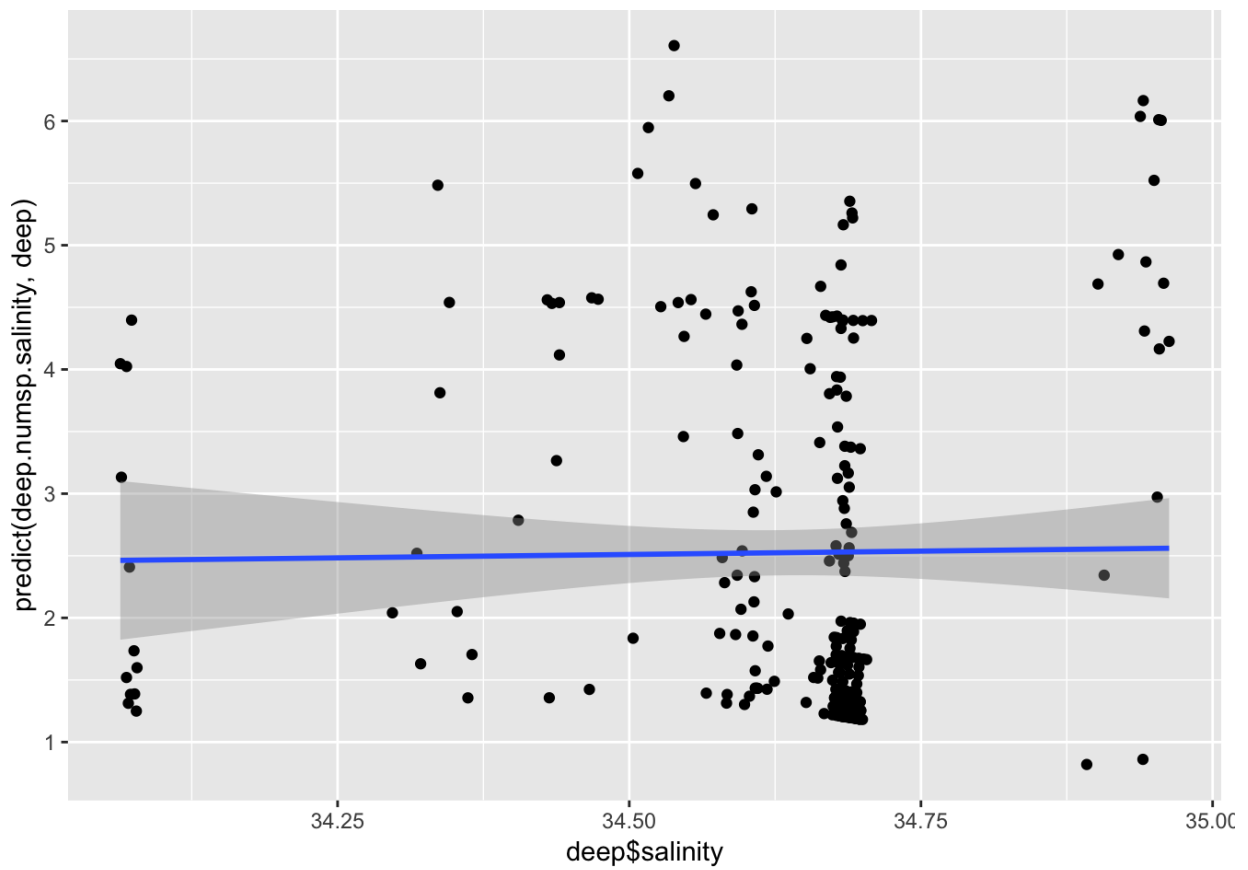

```

qplot(deep$nitrate, predict(deep.numsp.nitrate, deep)) + geom_smooth(method = "gam"
)

```

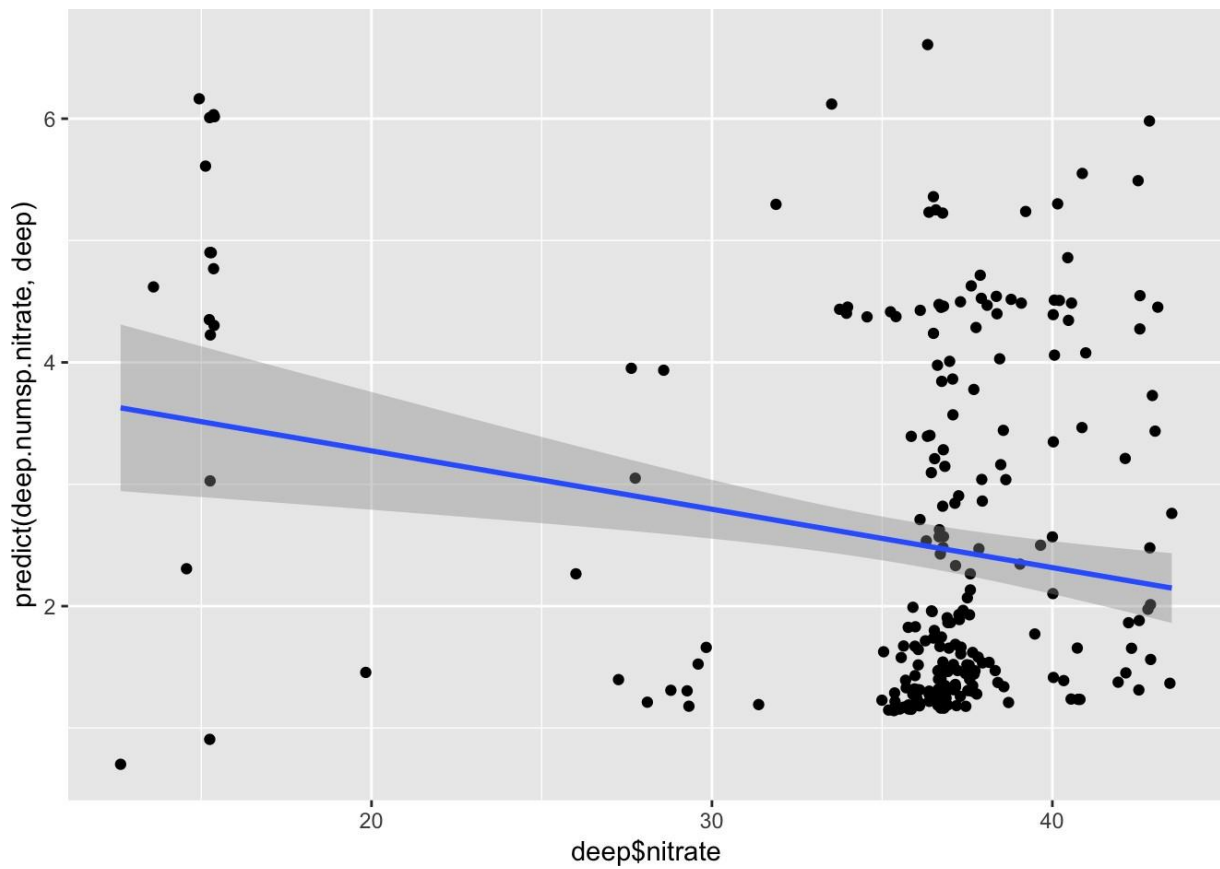

GAMs for ES50, deep water

We're now doing GAMs for the effects of the environment on the number of species estimated from rarefaction analyses. As above, we remove the "no.records" term because it is already included in the calculation of ES50.

```
deep.es50.intercept <- gam(ES50 ~ 1, data = deep, family = "nb", method = "REML", select = TRUE)
gam.check(deep.es50.intercept)
```

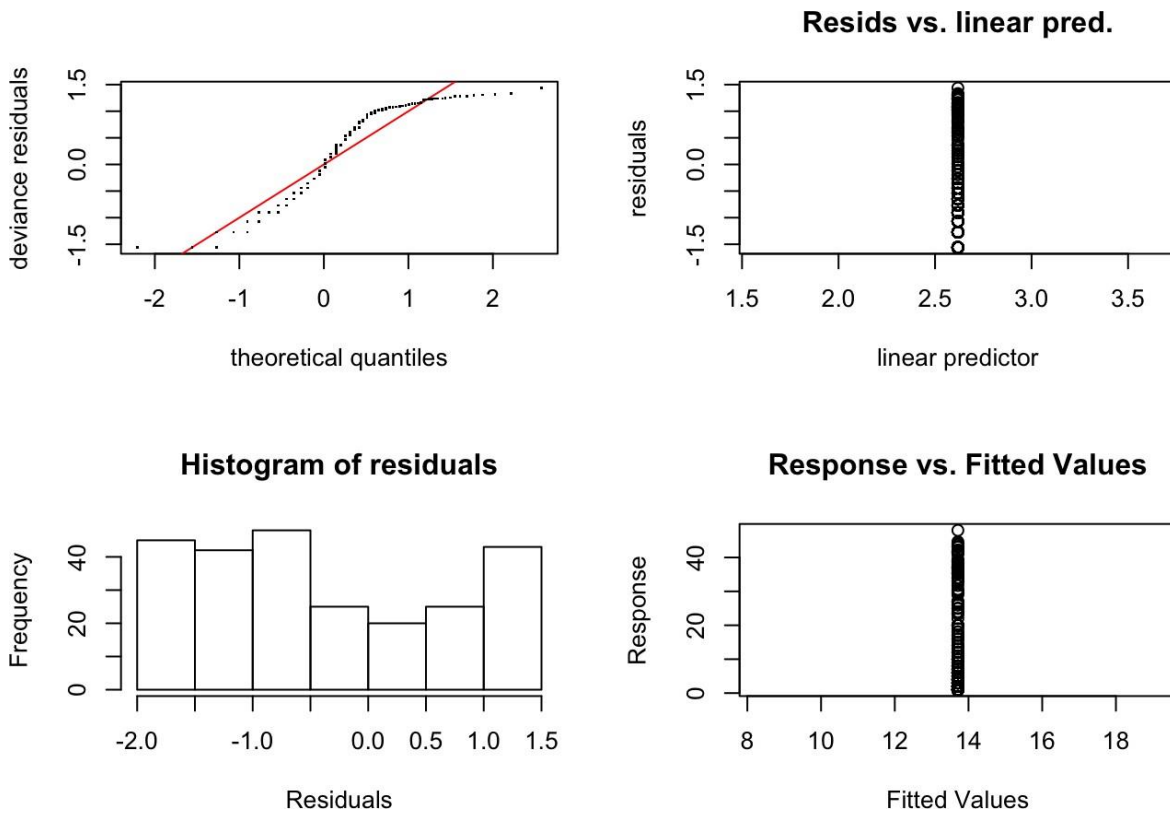

```
##
## Method: REML   Optimizer: outer newton
## full convergence after 3 iterations.
## Gradient range [2.716585e-10,2.716585e-10]
## (score 906.5347 & scale 1).
## Hessian positive definite, eigenvalue range [130.3561,130.3561].
## Model rank = 1 / 1
```

```
summary(deep.es50.intercept)
```



```
##
## Family: Negative Binomial(0.863)
## Link function: log
##
## Formula:
## ES50 ~ 1
##
## Parametric coefficients:
##             Estimate Std. Error z value Pr(>|z|)
## (Intercept)  2.61829    0.07046   37.16  <2e-16 ***
## ---
## Signif. codes:  0 '***' 0.001 '**' 0.01 '*' 0.05 '.' 0.1 ' ' 1
##
## R-sq.(adj) =      0   Deviance explained = 1.93e-08%
## -REML = 906.53   Scale est. = 1           n = 248
```

```
deep.es50.latlon <- gam(ES50 ~ s(lat, lon, bs = "sos") , data = deep, family = "nb"
, method = "REML", select = TRUE)
gam.check(deep.es50.latlon)
```

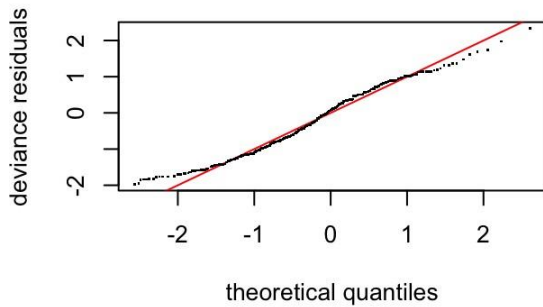

**Resids vs. linear pred.**

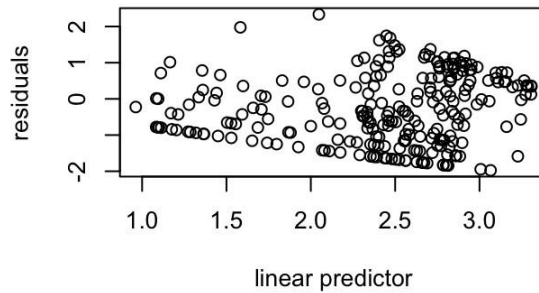

**Histogram of residuals**

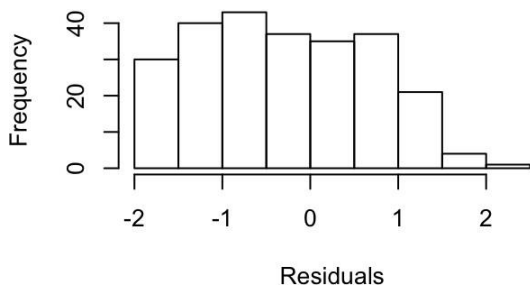

**Response vs. Fitted Values**

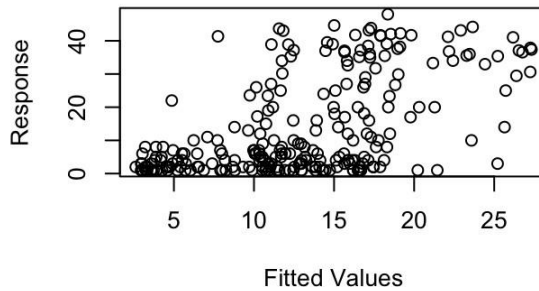

```
##
##Method:REML  Optimizer: outer newton
## full convergence after 4 iterations.
## Gradient range [-1.143111e-06,4.094961e-07]
## (score 889.619 & scale 1).
## Hessian positive definite, eigenvalue range [2.532821,104.0371].
## Model rank = 50 / 50
##
##Basis dimension (k) checking results. Low p-value (k-index<1) may
## indicate that k is too low, especially if edf is close to k'.
##
##          k' edf k-index p-value
## s(lat,lon) 49  17   0.86   0.13
```

```
summary(deep.es50.latlon)
```

```
##
## Family: Negative Binomial(1.121)
## Link function: log
##
## Formula:
## ES50 ~ s(lat, lon, bs = "sos")
##
## Parametric coefficients:
##          Estimate Std. Error z value Pr(>|z|)
## (Intercept)  2.43192    0.06339   38.36 <2e-16 ***
## ---
## Signif. codes:  0 '***' 0.001 '**' 0.01 '*' 0.05 '.' 0.1 ' ' 1
##
## Approximate significance of smooth terms:
##          edf Ref.df Chi.sq  p-value
## s(lat,lon) 17.04    49  89.19 1.66e-15 ***
## ---
## Signif. codes:  0 '***' 0.001 '**' 0.01 '*' 0.05 '.' 0.1 ' ' 1
##
## R-sq.(adj) =  0.229   Deviance explained =  28%
## -REML = 889.62  Scale est. = 1          n = 248
```

```
deep.es50.temp <- gam(ES50 ~ s(lat, lon, bs = "sos") + s(temp), data = deep, famil y
= "nb", method = "REML", select = TRUE)
gam.check(deep.es50.temp)
```

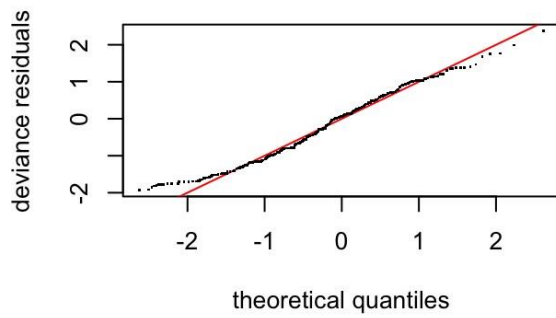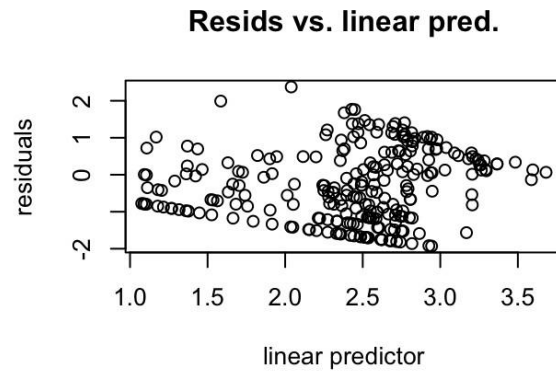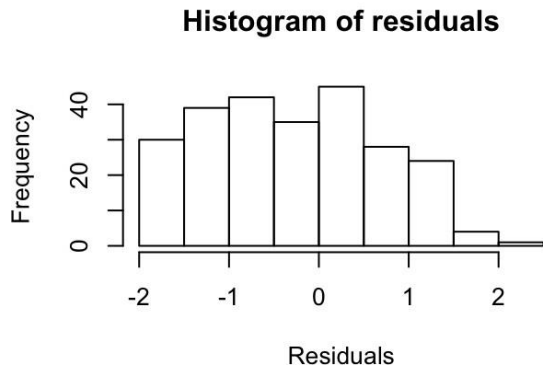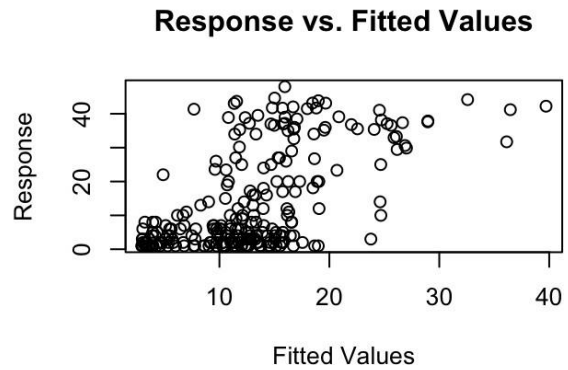

```
##
## Method: REML   Optimizer: outer newton
## full convergence after 9 iterations.
## Gradient range [-0.0004680909,0.0003360787]
## (score 887.7525 & scale 1).
## Hessian positive definite, eigenvalue range[0.0004680402,102.684].
## Model rank = 59 / 59
##
## Basis dimension (k) checking results. Low p-value (k-index<1) may
## indicate that k is too low, especially if edf is close to k'.
##
##           k'   edf k-index p-value
## s(lat,lon) 49.000 16.799   0.89   0.34
## s(temp)    9.000  0.847   0.77   0.01 **
## ---
## Signif. codes:  0 '***' 0.001 '**' 0.01 '*' 0.05 '.' 0.1 ' ' 1
```

```
summary(deep.es50.temp)
```

```
##
## Family: Negative Binomial(1.146)
## Link function: log
##
## Formula:
## ES50 ~ s(lat, lon, bs = "sos") + s(temp)
##
## Parametric coefficients:
##             Estimate Std. Error z value Pr(>|z|)
## (Intercept)  2.4218    0.0628   38.56 <2e-16 ***
## ---
## Signif. codes:  0 '***' 0.001 '**' 0.01 '*' 0.05 '.' 0.1 ' ' 1
##
## Approximate significance of smooth terms:
##             edf Ref.df Chi.sq p-value
## s(lat,lon) 16.7991     49 89.108 9.68e-16 ***
## s(temp)     0.8467      9  5.169 0.00824 **
## ---
## Signif. codes:  0 '***' 0.001 '**' 0.01 '*' 0.05 '.' 0.1 ' ' 1
##
## R-sq.(adj) = 0.278  Deviance explained=29.6%
## -REML=887.75Scale est. = 1          n = 248
```

```
deep.es50.oxygen <- gam(ES50 ~ s(lat, lon, bs = "sos") + s(dissolved.oxygen), data = deep, family = "nb", method = "REML", select = TRUE)
gam.check(deep.es50.oxygen)
```

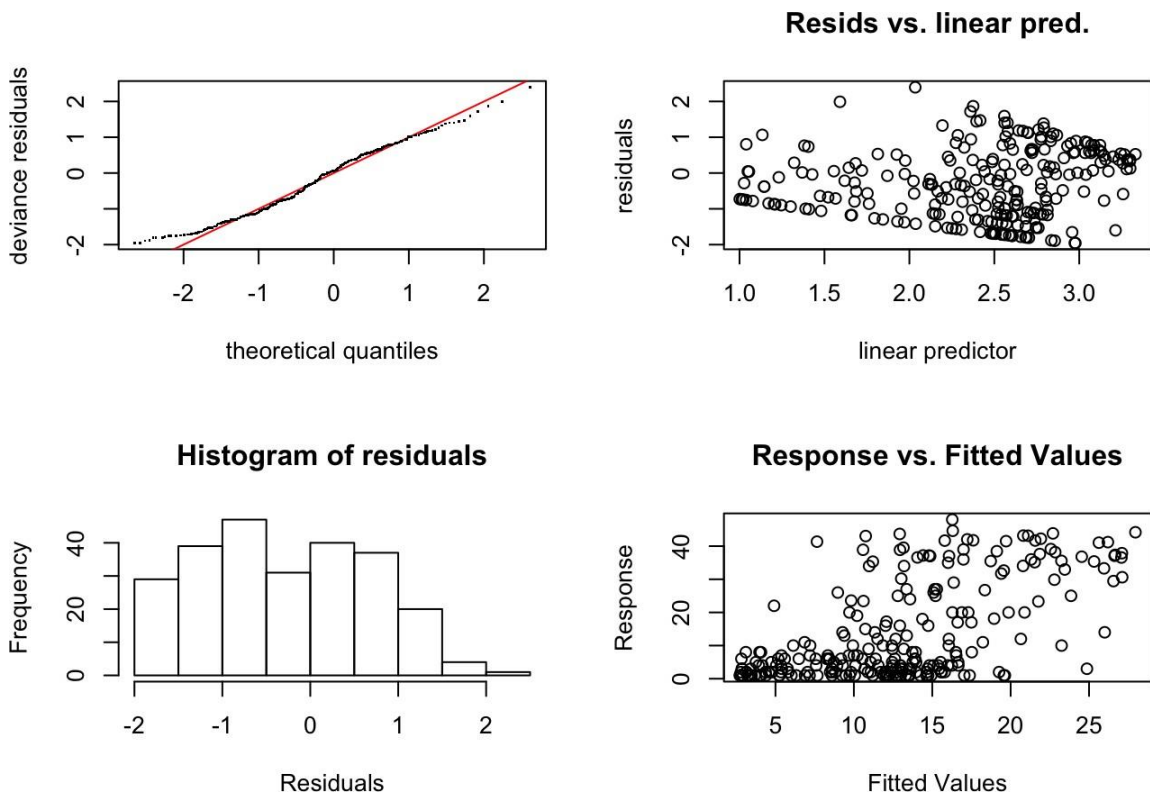

```
##
##Method:REML Optimizer: outer newton
## full convergence after 4 iterations.
## Gradient range [-0.0001959342,0.0001265859]
## (score 888.3044 & scale 1).
## Hessian positive definite, eigenvalue range [0.0001958078,100.738].
## Modelrank = 59 / 59
##
##Basis dimension (k) checking results. Low p-value (k-index<1) may
## indicate that k is too low, especially if edf is close to k'.
##
##              k'   edf k-index p-value
## s(lat,lon)      49.00 18.08   0.90   0.32
## s(dissolved.oxygen)  9.00  1.28   0.94   0.67
```

```
summary(deep.es50.oxygen)
```

```
##
## Family: Negative Binomial(1.159)
## Link function: log
##
## Formula:
## ES50 ~ s(lat, lon, bs = "sos") + s(dissolved.oxygen)
##
## Parametric coefficients:
##              Estimate Std. Error z value Pr(>|z|)
## (Intercept)  2.41289    0.06254   38.58 <2e-16 ***
## ---
## Signif. codes:  0 '***' 0.001 '**' 0.01 '*' 0.05 '.' 0.1 ' ' 1
##
## Approximate significance of smooth terms:
##              edf Ref.df Chi.sq  p-value
## s(lat,lon)      18.080    49 82.598 2.87e-14 ***
## s(dissolved.oxygen)  1.282     9  4.827  0.0105 *
## ---
## Signif. codes:  0 '***' 0.001 '**' 0.01 '*' 0.05 '.' 0.1 ' ' 1
##
## R-sq.(adj) =  0.276  Deviance explained = 30.9%
## -REML = 888.3  Scale est. = 1          n = 248
```

```
deep.es50.chlorophyll <- gam(ES50 ~ s(lat, lon, bs = "sos") + s(chlorophyll), dat a
= deep, family = "nb", method = "REML", select = TRUE)
gam.check(deep.es50.chlorophyll)
```

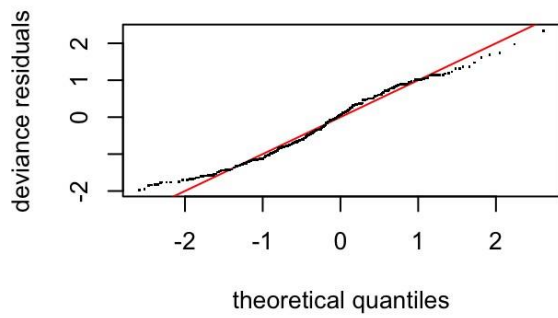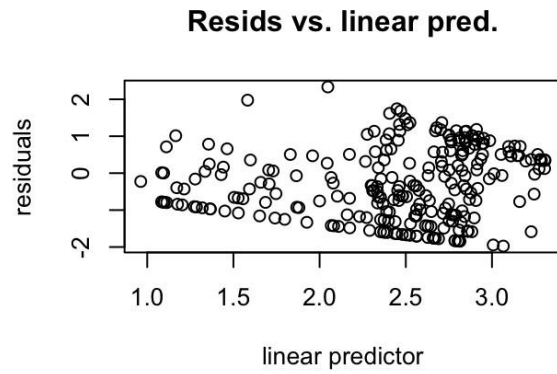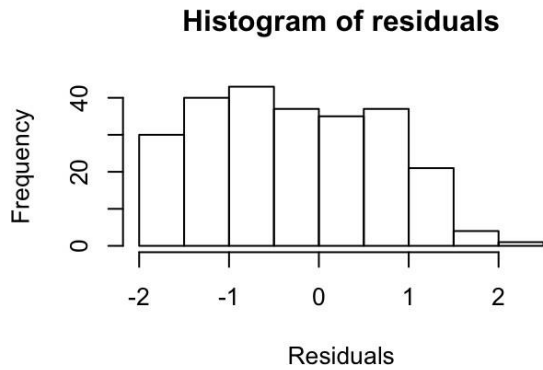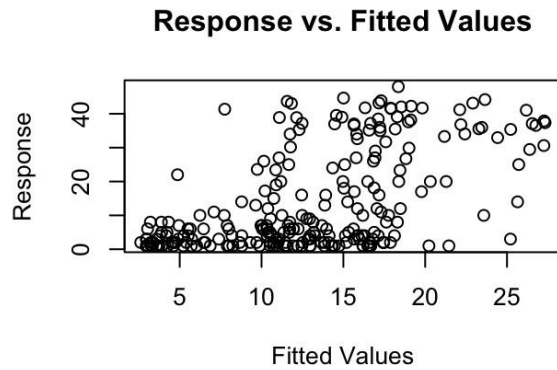

```
##
## Method: REML  Optimizer: outer newton
## full convergence after 6 iterations.
## Gradient range [-0.0003322345,0.0002701815]
## (score 889.6193 & scale 1).
## Hessian positive definite, eigenvalue range [2.314382e-05,104.0372].
## Model rank =  59 / 59
##
## Basis dimension (k) checking results. Low p-value (k-index<1) may
## indicate that k is too low, especially if edf is close to k'.
##
##           k'      edf k-index p-value
## s(lat,lon)  4.90e+01 1.70e+01  0.86  0.12
## s(chlorophyll) 9.00e+00 9.76e-04  0.94  0.71
```

```
summary(deep.es50.chlorophyll)
```

```
##
## Family: Negative Binomial(1.121)
## Link function: log
##
## Formula:
## ES50 ~ s(lat, lon, bs = "sos") + s(chlorophyll)
##
## Parametric coefficients:
##             Estimate Std. Error z value Pr(>|z|)
## (Intercept)  2.43192    0.06339   38.36  <2e-16 ***
## ---
## Signif. codes:  0 '***' 0.001 '**' 0.01 '*' 0.05 '.' 0.1 ' ' 1
##
## Approximate significance of smooth terms:
##             edf Ref.df Chi.sq  p-value
## s(lat,lon)    1.704e+01    49  89.18 1.66e-15 ***
## s(chlorophyll) 9.758e-04     9   0.00  0.824
## ---
## Signif. codes:  0 '***' 0.001 '**' 0.01 '*' 0.05 '.' 0.1 ' ' 1
##
## R-sq.(adj) = 0.229   Deviance explained = 28%
## -REML=889.62Scale est. = 1           n = 248
```

```
deep.es50.current <- gam(ES50 ~ s(lat, lon, bs = "sos") + s(current), data = dee
p, family = "nb", method = "REML", select = TRUE)
gam.check(deep.es50.current)
```

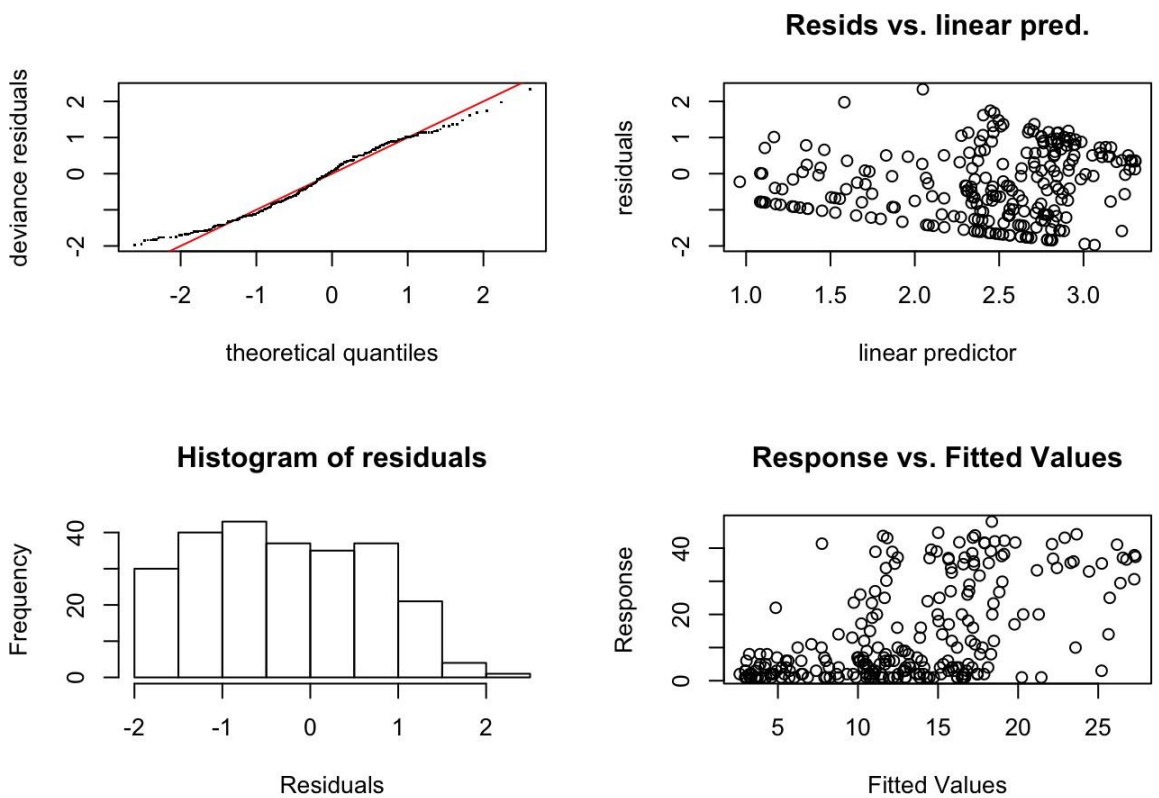

```
##
##Method:REML Optimizer: outer newton
## full convergence after 7 iterations.
## Gradient range [-0.0004904038,0.0002815296]
## (score 889.6195 & scale 1).
## Hessian positive definite, eigenvalue range [5.346121e-06,104.0371].
## Modelrank = 59 / 59
##
##Basis dimension (k) checking results. Low p-value (k-index<1) may
## indicate that k is too low, especially if edf is close to k'.
##
##          k'      edf k-index p-value
## s(lat,lon) 49.00000 17.03618    0.86  0.145
## s(current)  9.00000  0.00136    0.83  0.085.
## ---
## Signif. codes:  0 '***' 0.001 '**' 0.01 '*' 0.05 '.' 0.1 ' ' 1
```

```
summary(deep.es50.current)
```

```
##
## Family: Negative Binomial(1.121)
## Link function: log
##
## Formula:
## ES50 ~ s(lat, lon, bs = "sos") + s(current)
##
## Parametric coefficients:
##          Estimate Std. Error z value Pr(>|z|)
## (Intercept)  2.43192    0.06339   38.36 <2e-16 ***
## ---
## Signif. codes:  0 '***' 0.001 '**' 0.01 '*' 0.05 '.' 0.1 ' ' 1
##
## Approximate significance of smooth terms:
##          edf Ref.df Chi.sq  p-value
## s(lat,lon) 17.036183     49  89.18 1.66e-15 ***
## s(current)  0.001356      9   0.00   0.72
## ---
## Signif. codes:  0 '***' 0.001 '**' 0.01 '*' 0.05 '.' 0.1 ' ' 1
##
## R-sq.(adj) =  0.229  Deviance explained =  28%
## -REML=889.62Scale est. = 1          n = 248
```

```
deep.es50.salinity <- gam(ES50 ~ s(lat, lon, bs = "sos") + s(salinity), data = de
ep, family = "nb", method = "REML", select = TRUE)
gam.check(deep.es50.salinity)
```



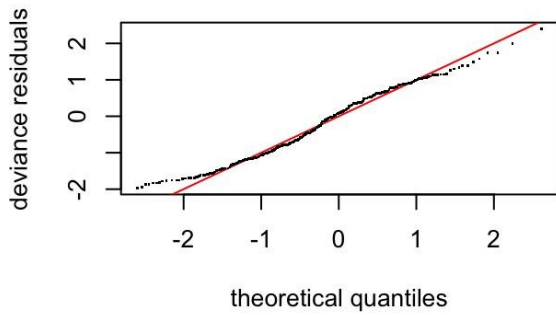

**Resids vs. linear pred.**

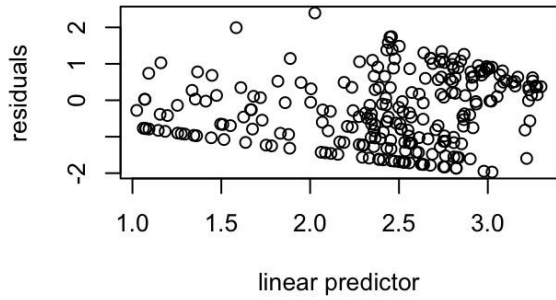

**Histogram of residuals**

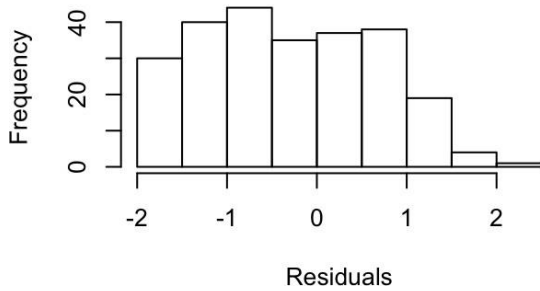

**Response vs. Fitted Values**

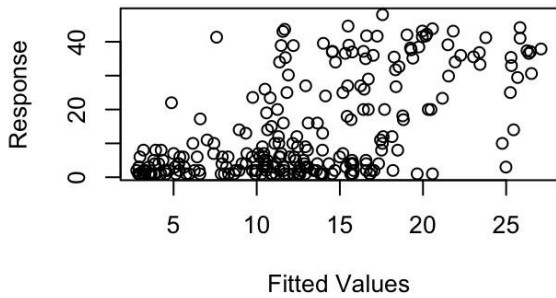

```
##
## Method: REML  Optimizer: outer newton
## full convergence after 4 iterations.
## Gradient range [-0.0004229958,0.0001480549]
## (score 889.1231 & scale 1).
## Hessian positive definite, eigenvalue range [5.59459e-05,101.5801].
## Model rank =  59 / 59
##
## Basis dimension (k) checking results. Low p-value (k-index<1) may
## indicate that k is too low, especially if edf is close to k'.
##
##           k'   edf k-index p-value
## s(lat,lon) 49.00 17.11   0.88   0.24
## s(salinity)  9.00  1.62   0.93   0.59
```

```
summary(deep.es50.salinity)
```

```
##
## Family: Negative Binomial(1.145)
## Link function: log
##
## Formula:
## ES50 ~ s(lat, lon, bs = "sos") + s(salinity)
##
## Parametric coefficients:
##             Estimate Std. Error z value Pr(>|z|)
## (Intercept)  2.41959    0.06284   38.5 <2e-16 ***
## ---
## Signif. codes:  0 '***' 0.001 '**' 0.01 '*' 0.05 '.' 0.1 ' ' 1
##
## Approximate significance of smooth terms:
##             edf Ref.df Chi.sq  p-value
## s(lat,lon)  17.11    49 86.501 1.16e-15 ***
## s(salinity)  1.62     9  4.004  0.0373 *
## ---
## Signif. codes:  0 '***' 0.001 '**' 0.01 '*' 0.05 '.' 0.1 ' ' 1
##
## R-sq.(adj) =  0.261   Deviance explained = 29.9%
## -REML= 889.12 Scale est. = 1           n = 248
```

```
deep.es50.nitrate <- gam(ES50 ~ s(lat, lon, bs = "sos") + s(nitrate), data = dee
p, family = "nb", method = "REML", select = TRUE)
gam.check(deep.es50.nitrate)
```

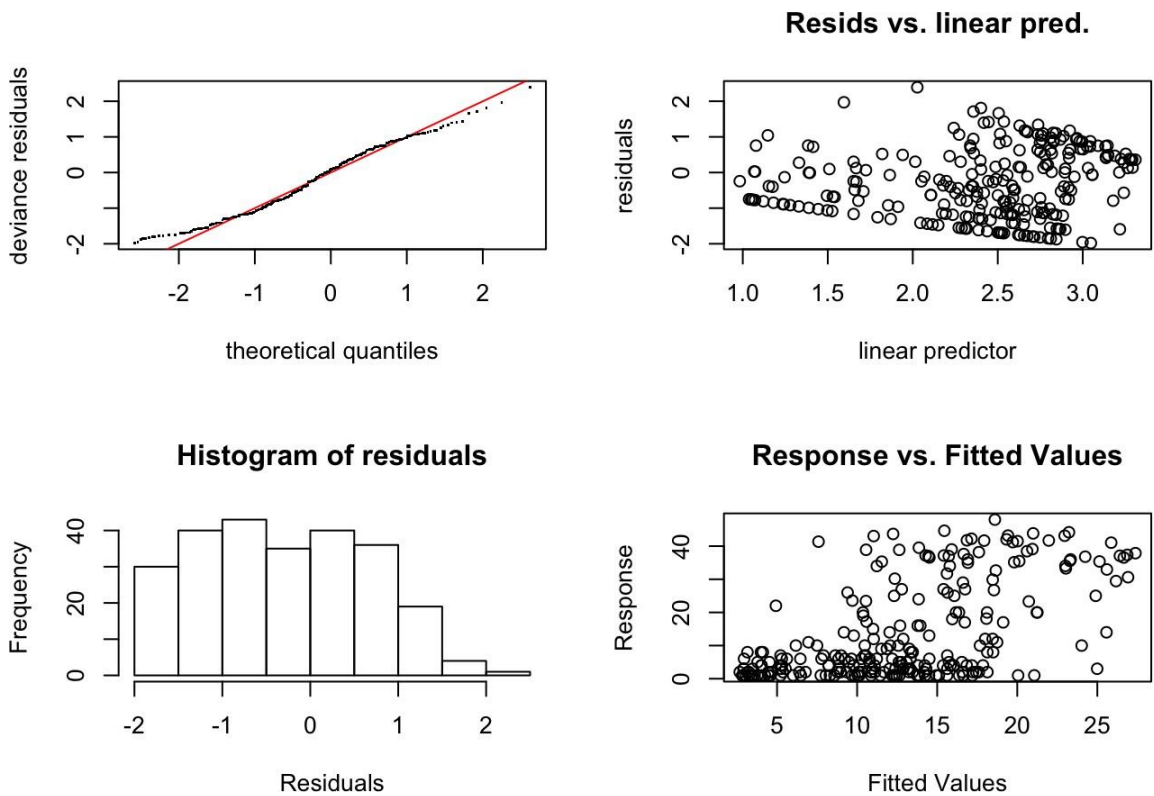

```
##
##Method:REML Optimizer: outer newton
## full convergence after 4 iterations.
## Gradient range [-0.0001644731,7.83587e-05]
## (score 889.0222 & scale 1).
## Hessian positive definite, eigenvalue range [0.0001644127,102.0879].
## Modelrank = 59 / 59
##
##Basis dimension (k) checking results. Low p-value (k-index<1) may
## indicate that k is too low, especially if edf is close to k'.
##
##          k'   edf k-index p-value
## s(lat,lon) 49.00 17.34   0.88   0.19
## s(nitrate)  9.00  1.15   0.85   0.10
```

```
summary(deep.es50.nitrate)
```

```
##
## Family: Negative Binomial(1.141)
## Link function: log
##
## Formula:
## ES50 ~ s(lat, lon, bs = "sos") + s(nitrate)
##
## Parametric coefficients:
##           Estimate Std. Error z value Pr(>|z|)
## (Intercept)  2.42141    0.06295   38.46  <2e-16 ***
## ---
## Signif. codes:  0 '***' 0.001 '**' 0.01 '*' 0.05 '.' 0.1 ' ' 1
##
## Approximate significance of smooth terms:
##           edf Ref.df Chi.sq  p-value
## s(lat,lon) 17.344     49 81.402 2.79e-14 ***
## s(nitrate)  1.149     9  2.899  0.041 *
## ---
## Signif. codes:  0 '***' 0.001 '**' 0.01 '*' 0.05 '.' 0.1 ' ' 1
##
## R-sq.(adj) =  0.25   Deviance explained = 29.6%
## -REML = 889.02   Scale est. = 1           n = 248
```

```
deep.es50.env <- gam(ES50 ~ s(lat, lon, bs = "sos") + s(temp) + s(dissolved.oxygen) + s(chlorophyll) + s(current) + s(salinity) + s(nitrate), data = deep, family = "nb", method = "REML", select = TRUE)
gam.check(deep.es50.env)
```

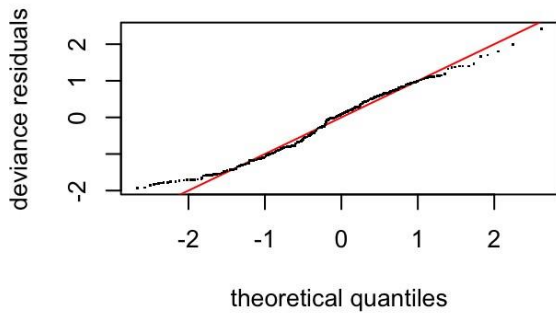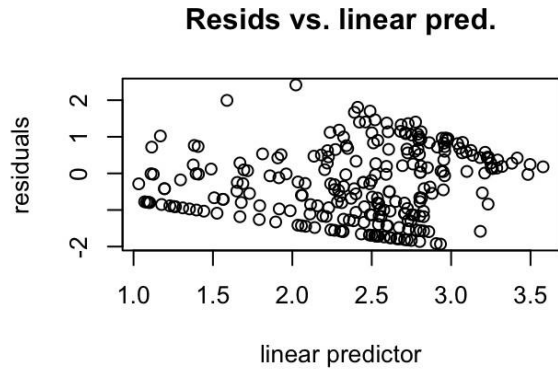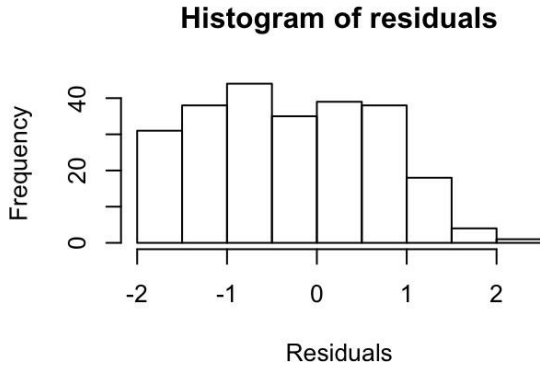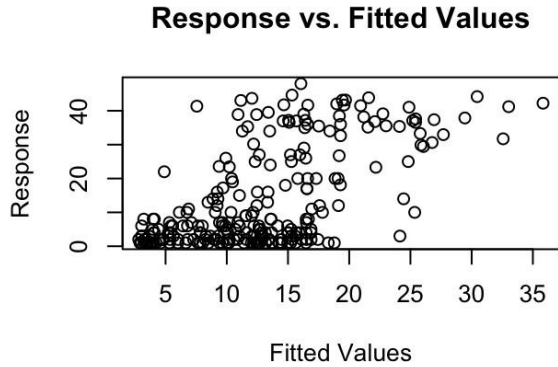

```
##
## Method: REML   Optimizer: outer newton
## full convergence after 13 iterations.
## Gradient range [-0.0002630044,0.0001745135]
## (score 886.9873 & scale 1).
## Hessian positive definite, eigenvalue range [3.801833e-06,101.7219].
## Model rank = 104 / 104
##
## Basis dimension (k) checking results. Low p-value (k-index<1) may
## indicate that k is too low, especially if edf is close to k'.
##
##           k'      edf k-index p-value
## s(lat,lon)  4.90e+01 1.59e+01  0.90  0.315
## s(temp)     9.00e+00 8.60e-01  0.79  0.025 *
## s(dissolved.oxygen) 9.00e+00 4.99e-05  0.93  0.580
## s(chlorophyll) 9.00e+00 3.76e-05  0.95  0.635
## s(current)  9.00e+00 3.27e-05  0.85  0.100 .
## s(salinity) 9.00e+00 6.62e-01  0.93  0.565
## s(nitrate)  9.00e+00 8.86e-01  0.89  0.270
## ---
## Signif. codes:  0 '***' 0.001 '**' 0.01 '*' 0.05 '.' 0.1 ' ' 1
```

```
summary(deep.es50.env)
```

```
##
## Family: Negative Binomial(1.159)
## Link function: log
##
## Formula:
## ES50 ~ s(lat, lon, bs = "sos") + s(temp) + s(dissolved.oxygen) +
##   s(chlorophyll) + s(current) + s(salinity) + s(nitrate)
##
## Parametric coefficients:
##           Estimate Std. Error z value Pr(>|z|)
## (Intercept)  2.41592    0.06252   38.64  <2e-16 ***
## ---
## Signif. codes:  0 '***' 0.001 '**' 0.01 '*' 0.05 '.' 0.1 ' ' 1
##
## Approximate significance of smooth terms:
##           edf Ref.df Chi.sq p-value
## s(lat,lon)    1.588e+01    49  74.255 1.6e-13 ***
## s(temp)       8.596e-01     9   5.854 0.00488 **
## s(dissolved.oxygen) 4.994e-05     9   0.000 0.43457
## s(chlorophyll) 3.756e-05     9   0.000 0.94571
## s(current)    3.274e-05     9   0.000 1.00000
## s(salinity)   6.615e-01     9   2.046 0.03428 *
## s(nitrate)    8.861e-01     9   1.547 0.10430
## ---
## Signif. codes:  0 '***' 0.001 '**' 0.01 '*' 0.05 '.' 0.1 ' ' 1
##
## R-sq.(adj) =  0.287   Deviance explained = 30.5%
## -REML= 886.99 Scale est. = 1           n = 248
```

## Model selection for ES50, deep water

```
deep.es50.models <- list(deep.es50.intercept = deep.es50.intercept,
  deep.es50.latlon = deep.es50.latlon,
  deep.es50.temp = deep.es50.temp,
  deep.es50.oxygen = deep.es50.oxygen,
  deep.es50.chlorophyll = deep.es50.chlorophyll,
  deep.es50.current = deep.es50.current,
  deep.es50.salinity = deep.es50.salinity,
  deep.es50.nitrate = deep.es50.nitrate,
  deep.es50.env = deep.es50.env)
deep.es50.aic.df <- data.frame(Model = names(deep.es50.models),
  AIC = sapply(deep.es50.models, function(x) x$aic),
  akaike.weights(sapply(deep.es50.models, function(x) x$aic)))
deep.es50.aic.df <- deep.es50.aic.df[order(deep.es50.aic.df$AIC),]
deep.es50.aic.df$Cumulative.Weight <- cumsum(deep.es50.aic.df$weights)

kable(deep.es50.aic.df, row.names = FALSE)
```

| Model            | AIC      | deltaAIC  | rel.LL    | weights   | Cumulative.Weight |
|------------------|----------|-----------|-----------|-----------|-------------------|
| deep.es50.env    | 1751.424 | 0.0000000 | 1.0000000 | 0.3917528 | 0.3917528         |
| deep.es50.oxygen | 1752.042 | 0.6181978 | 0.7341082 | 0.2875889 | 0.6793417         |

| Model                 | AIC      | deltaAIC   | rel.LL    | weights   | Cumulative.Weight |
|-----------------------|----------|------------|-----------|-----------|-------------------|
| deep.es50.temp        | 1753.522 | 2.0980682  | 0.3502759 | 0.1372216 | 0.8165632         |
| deep.es50.salinity    | 1754.545 | 3.1215021  | 0.2099783 | 0.0822596 | 0.8988228         |
| deep.es50.nitrate     | 1755.165 | 3.7416483  | 0.1539967 | 0.0603286 | 0.9591514         |
| deep.es50.latlon      | 1758.141 | 6.7175613  | 0.0347776 | 0.0136242 | 0.9727757         |
| deep.es50.chlorophyll | 1758.143 | 6.7191041  | 0.0347508 | 0.0136137 | 0.9863894         |
| deep.es50.current     | 1758.143 | 6.7195658  | 0.0347428 | 0.0136106 | 1.0000000         |
| deep.es50.intercept   | 1811.602 | 60.1779873 | 0.0000000 | 0.0000000 | 1.0000000         |

```
write.csv(deep.es50.aic.df, file = "deep.es50.aic.csv")
```

We find that model selection supports the importance of the environment in explaining the number of species in a community. These results are only moderately strong, however; the delta AIC between the “env” model and the one for spatial autocorrelation is only 3.65. We also note that there is no strong signal indicating which predictor variable is important in explaining ES50; both oxygen and salinity are within delta AIC of 2 compared to the full model.

## Plots for ES50, deep water

```
qplot(deep$temp, predict(deep.es50.temp, deep)) + geom_smooth(method = "gam")
```

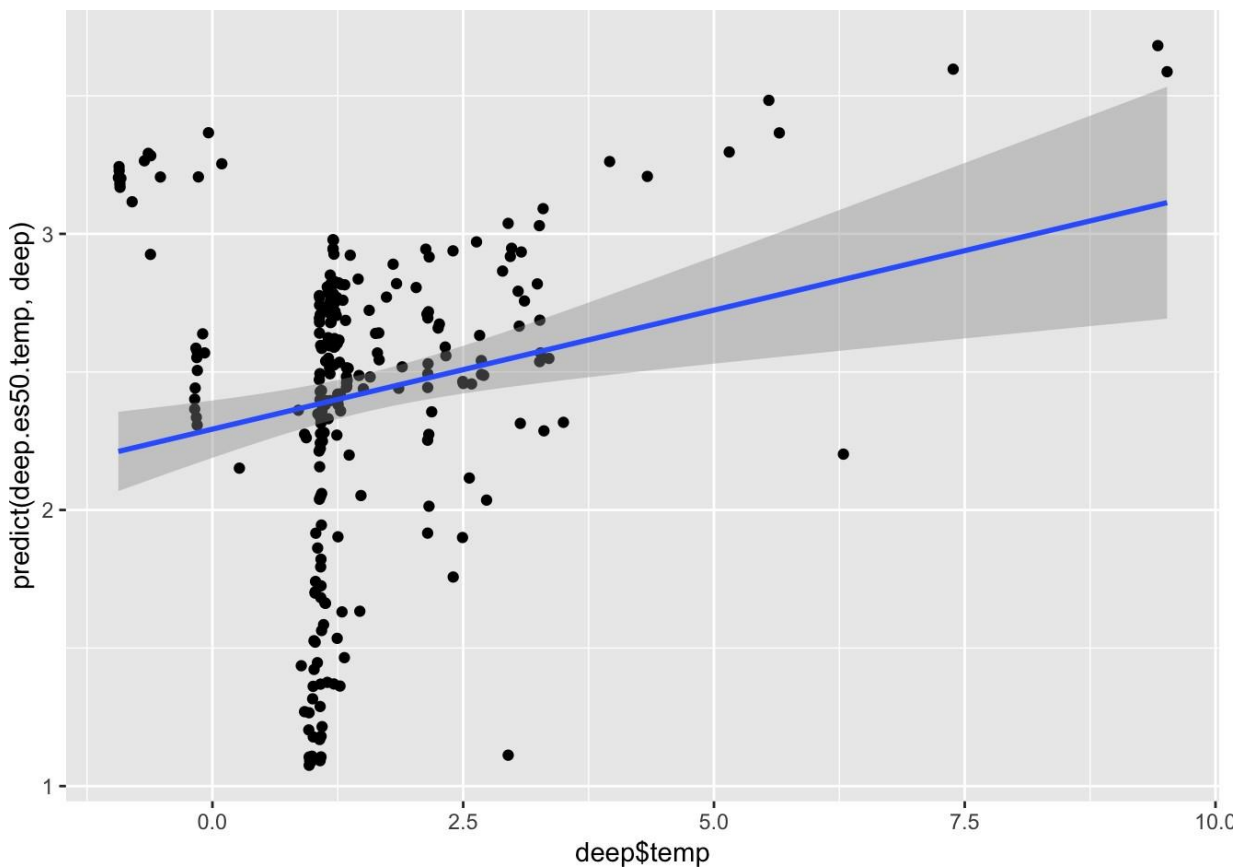

```
qplot(deep$dissolved.oxygen, predict(deep.es50.oxygen, deep)) + geom_smooth(method = "gam")
```

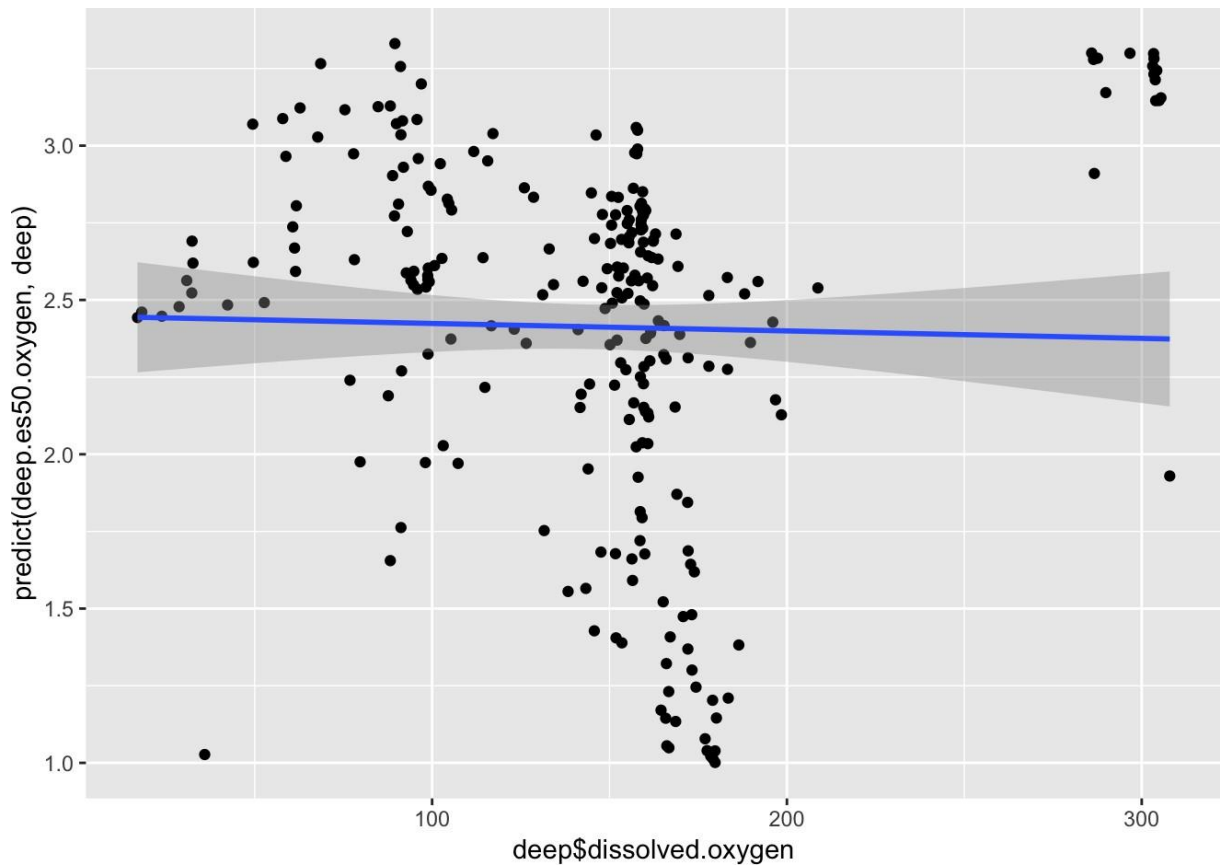

```
qplot(deep$chlorophyll, predict(deep.es50.chlorophyll, deep)) + geom_smooth(method = "gam")
```

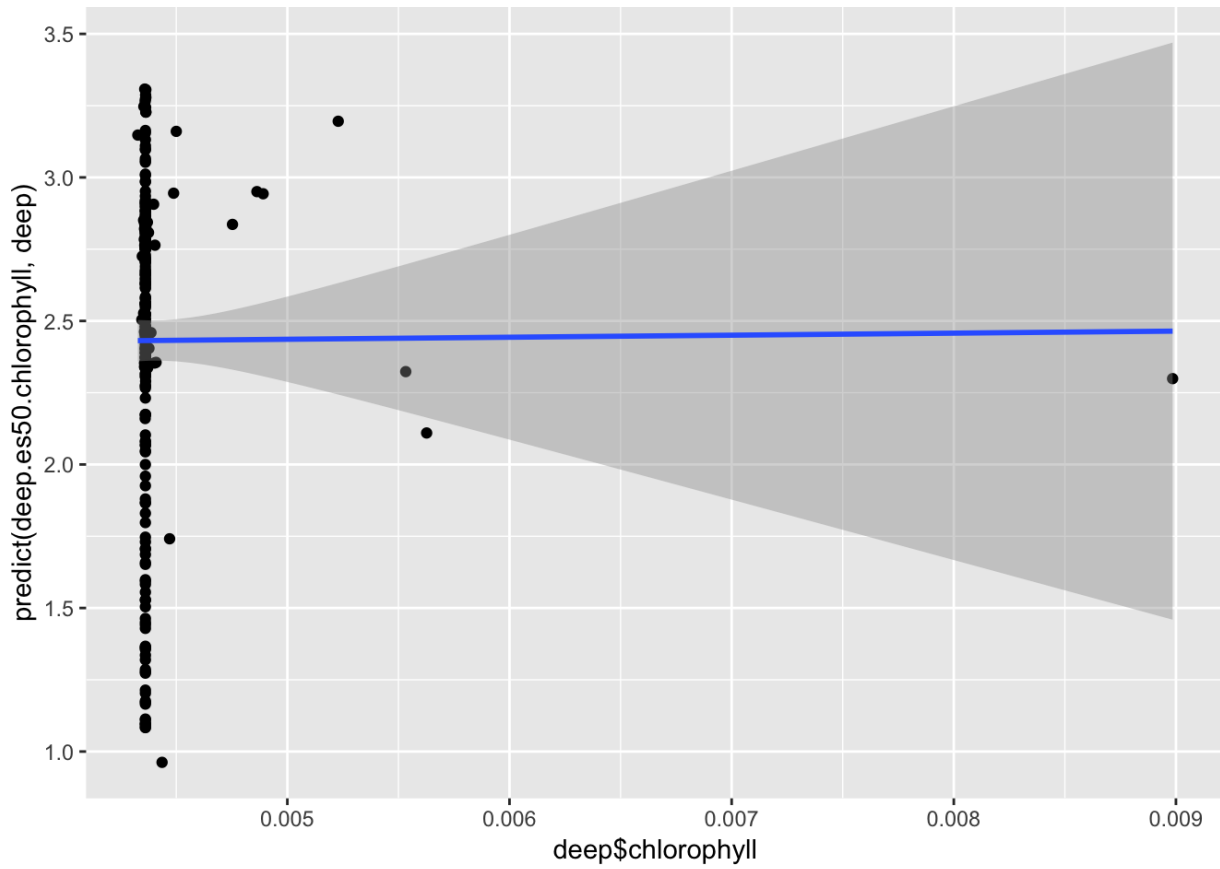

```
qplot(deep$current, predict(deep.es50.current, deep)) + geom_smooth(method = "gam")
```

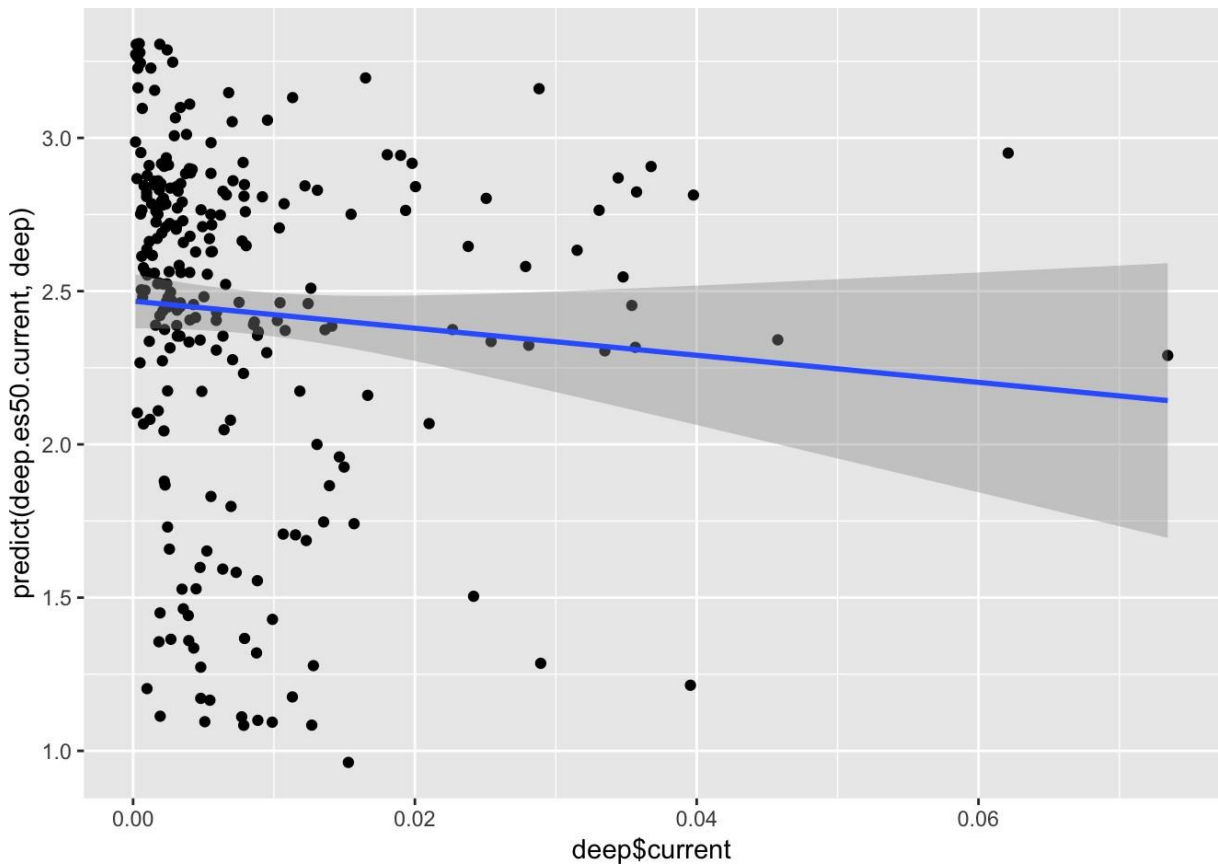

```
qplot(deep$salinity, predict(deep.es50.salinity, deep)) + geom_smooth(method = "gam")
```

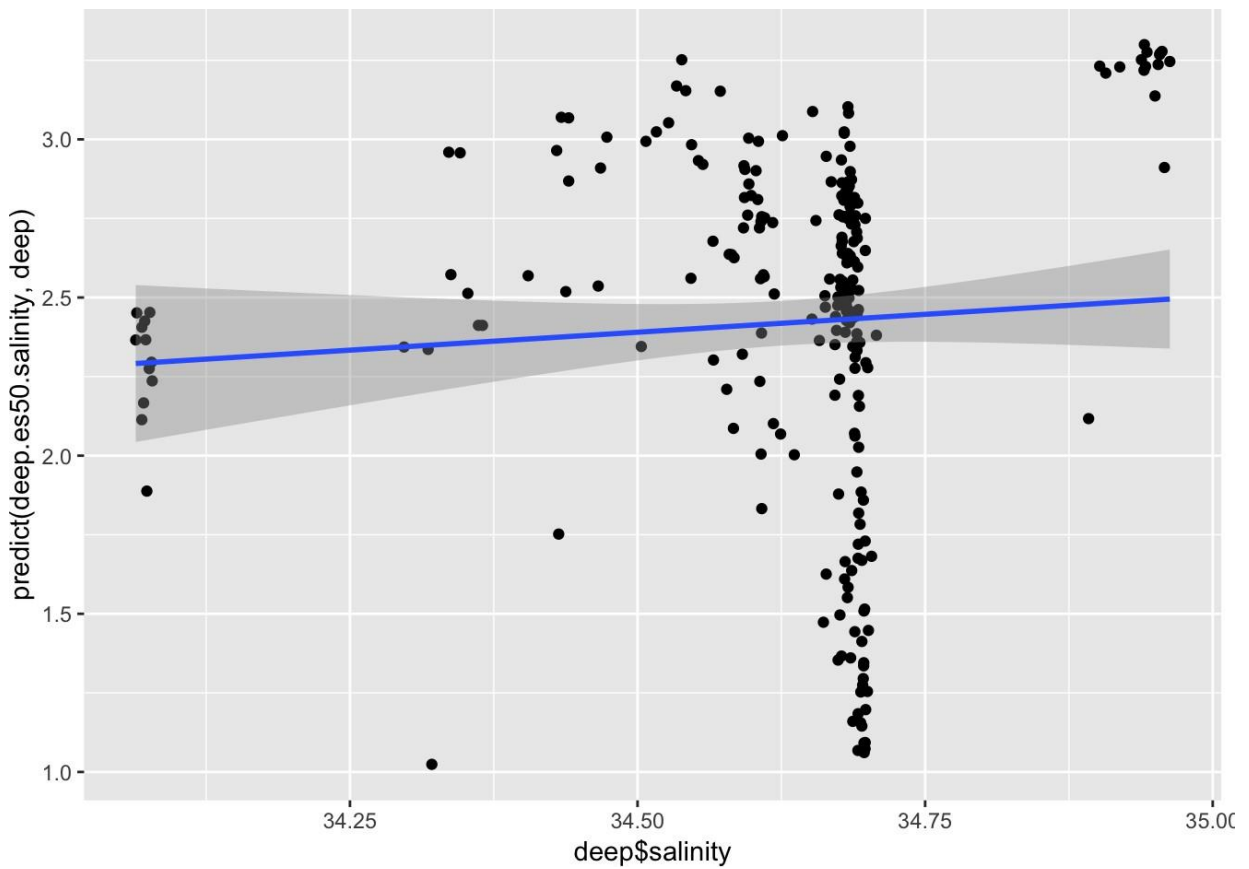

```
qplot(deep$nitrate, predict(deep.es50.nitrate, deep)) + geom_smooth(method = "gam")
```



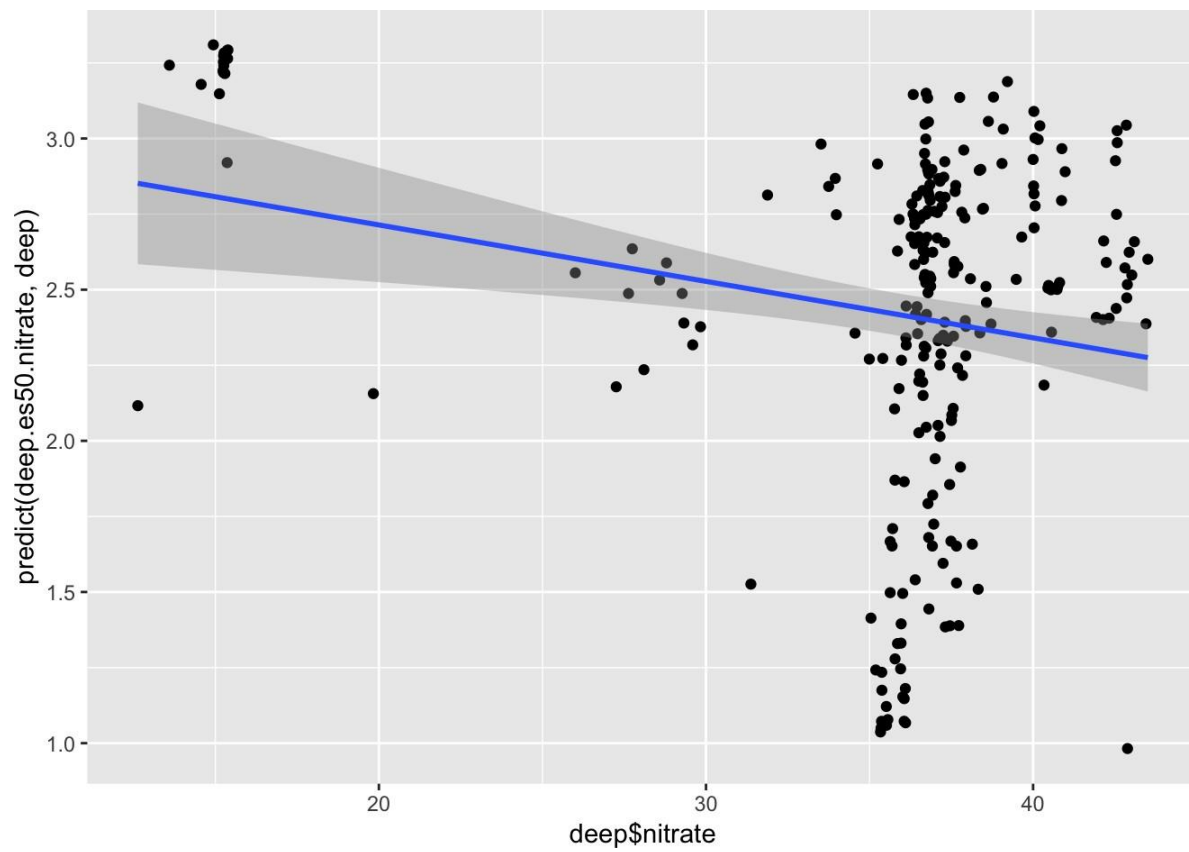

## S2. Species Counts and Environment Based on 5° Latitudinal Bands.

Setup

Shallow water

Deep water

# Species Counts and Environment, 5 degree bands

## Setup

## Shallow water

## Data load-in and visualization

First we're going to load in our data and then trim the data frame down to just the columns we need.

```
shallow <- read.csv("shallow.5.degree.csv")
analysis.cols <- c("area", "num.records", "num.species", "ES50", "dissolved.oxygen"
, "temp", "primary.productivity", "chlorophyll", "current", "o2.saturate", "salinit
y", "nitrate")
shallow <- shallow[,analysis.cols]
shallow <- shallow[complete.cases(shallow),]
corrplot(cor(shallow))
```

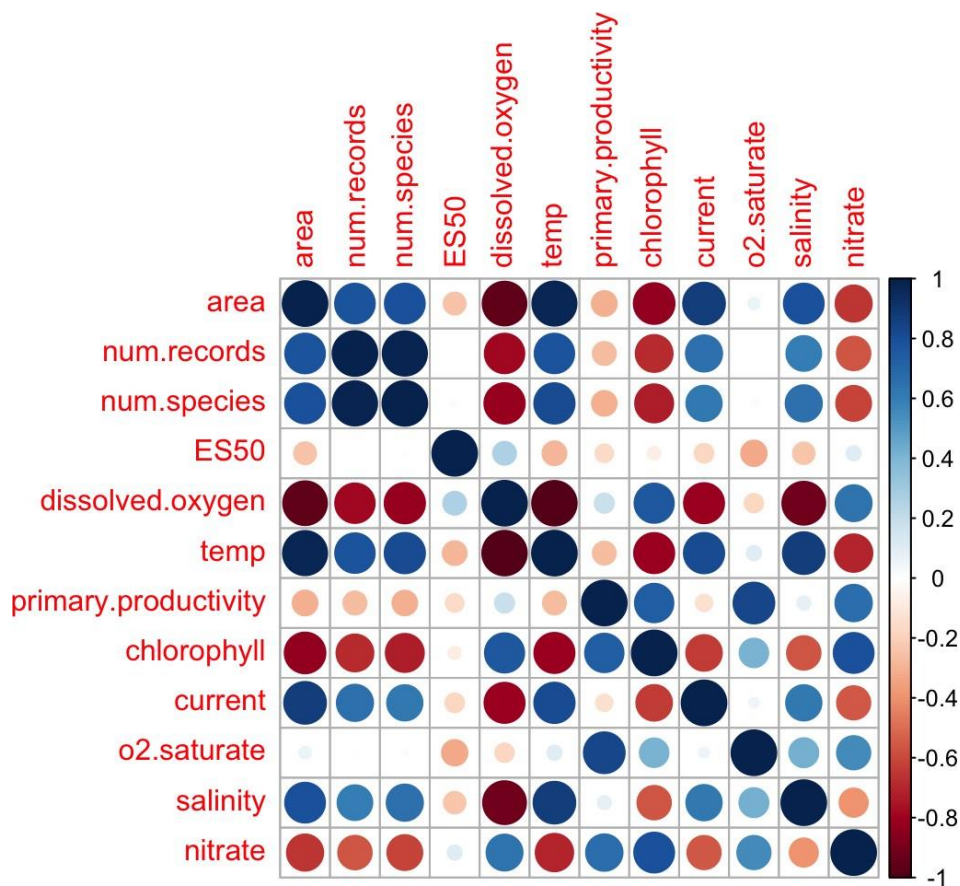

## GLMs for number of species, shallow water

We're going to develop a number of GLMs here. The "intercept" glm represents the fit of a model that assumes no relationship between the species counts and the environment and no spatial autocorrelation. The "numrec" model represents the fit of a model that only contains sampling bias. The remainder of the models ("temp", "oxygen", etc.) estimate the effects of a single predictor at a time, controlling for number of records.

```
shallow.numsp.intercept <- glm(num.species ~ 1, family = "poisson", data = shallow)
summary(shallow.numsp.intercept)
```

```
##
## Call:
## glm(formula = num.species ~ 1, family = "poisson", data = shallow)
##
## Deviance Residuals:
##      Min       1Q   Median       3Q      Max
## -119.171   -66.422   -9.743    36.253   137.422
##
## Coefficients:
##              Estimate Std. Error z value Pr(>|z|)
## (Intercept) 8.871672    0.002961   2996 <2e-16 ***
## ---
## Signif. codes:  0 '***' 0.001 '**' 0.01 '*' 0.05 '.' 0.1 ' ' 1
##
## (Dispersion parameter for poisson family taken to be 1)
##
## Null deviance: 77725  on 15  degrees of freedom
## Residual deviance: 77725  on 15  degrees of freedom
## AIC: 77885
##
## Number of Fisher Scoring iterations: 5
```

```
shallow.numsp.numrec <- glm(num.species ~ num.records, family = "poisson", data = s
hallow)
summary(shallow.numsp.numrec)
```

```
##
## Call:
## glm(formula = num.species ~ num.records, family = "poisson",
##      data = shallow)
##
## Deviance Residuals:
##      Min       1Q   Median       3Q      Max
##  -76.324  -35.422    4.397   16.433   50.351
##
## Coefficients:
##              Estimate Std. Error z value Pr(>|z|)
## (Intercept) 7.985e+00  5.350e-03   1492 <2e-16 ***
## num.records 7.009e-05  2.770e-07    253 <2e-16 ***
## ---
## Signif. codes:  0 '***' 0.001 '**' 0.01 '*' 0.05 '.' 0.1 ' ' 1
##
## (Dispersion parameter for poisson family taken to be 1)
##
## Null deviance: 77725  on 15  degrees of freedom
## Residual deviance: 22879  on 14  degrees of freedom
## AIC: 23041
##
## Number of Fisher Scoring iterations: 5
```

```
shallow.numsp.temp <- glm(num.species ~ num.records + temp, family = "poisson", dat
a = shallow)
summary(shallow.numsp.temp)
```

```
##
## Call:
## glm(formula = num.species ~ num.records + temp, family = "poisson",
##      data = shallow)
##
## Deviance Residuals:
##      Min       1Q   Median       3Q      Max
## -61.993  -25.333   -0.182   14.483   41.945
##
## Coefficients:
##              Estimate Std. Error z value Pr(>|z|)
## (Intercept)  7.613e+00  7.513e-03 1013.22  <2e-16 ***
## num.records  4.501e-05  3.955e-07  113.82  <2e-16 ***
## temp        3.653e-02  4.051e-04   90.17  <2e-16 ***
## ---
## Signif. codes:  0 '***' 0.001 '**' 0.01 '*' 0.05 '.' 0.1 ' ' 1
##
## (Dispersion parameter for poisson family taken to be 1)
##
## Null deviance: 77725  on 15  degrees of freedom
## Residual deviance: 14661  on 13  degrees of freedom
## AIC: 14825
##
## Number of Fisher Scoring iterations: 5
```

```
shallow.numsp.oxygen <- glm(num.species ~ num.records + dissolved.oxygen, family
= "poisson", data = shallow)
summary(shallow.numsp.oxygen)
```

```
##
## Call:
## glm(formula = num.species ~ num.records + dissolved.oxygen, family = "poisson",
##      data = shallow)
##
## Deviance Residuals:
##      Min       1Q   Median       3Q      Max
## -55.481  -21.004    2.088   17.144   37.645
##
## Coefficients:
##              Estimate Std. Error z value Pr(>|z|)
## (Intercept)  1.021e+01  2.223e-02  459.27  <2e-16 ***
## num.records  4.296e-05  3.932e-07  109.25  <2e-16 ***
## dissolved.oxygen -7.578e-03  7.637e-05  -99.22  <2e-16 ***
## ---
## Signif. codes:  0 '***' 0.001 '**' 0.01 '*' 0.05 '.' 0.1 ' ' 1
##
## (Dispersion parameter for poisson family taken to be 1)
##
## Null deviance: 77725  on 15  degrees of freedom
## Residual deviance: 12441  on 13  degrees of freedom
## AIC: 12605
##
## Number of Fisher Scoring iterations: 5
```

```
shallow.numsp.prod <- glm(num.species ~ num.records + primary.productivity, family = "poisson", data = shallow)
summary(shallow.numsp.prod)
```

```
##
## Call:
## glm(formula = num.species ~ num.records + primary.productivity,
##      family = "poisson", data = shallow)
##
## Deviance Residuals:
##      Min       1Q   Median       3Q      Max
## -79.472  -40.316   7.588   18.270   50.049
##
## Coefficients:
##              Estimate Std. Error z value Pr(>|z|)
## (Intercept)    8.142e+00  8.451e-03  963.39 <2e-16 ***
## num.records     6.768e-05  2.936e-07  230.54 <2e-16 ***
## primary.productivity -2.639e+01  1.138e+00 -23.18 <2e-16 ***
## ---
## Signif. codes:  0 '***' 0.001 '**' 0.01 '*' 0.05 '.' 0.1 ' ' 1
##
## (Dispersion parameter for poisson family taken to be 1)
##
##      Null deviance: 77725  on 15  degrees of freedom
## Residual deviance: 22337  on 13  degrees of freedom
## AIC: 22501
##
## Number of Fisher Scoring iterations: 5
```

```
shallow.numsp.chlorophyll <- glm(num.species ~ num.records + chlorophyll, family = "poisson", data = shallow)
summary(shallow.numsp.chlorophyll)
```

```
##
## Call:
## glm(formula = num.species ~ num.records + chlorophyll, family = "poisson",
##      data = shallow)
##
## Deviance Residuals:
##      Min       1Q   Median       3Q      Max
## -64.497  -29.226   -8.027   15.647   52.590
##
## Coefficients:
##              Estimate Std. Error z value Pr(>|z|)
## (Intercept)  8.662e+00  9.461e-03  915.52  <2e-16 ***
## num.records  5.093e-05  3.639e-07  139.95  <2e-16 ***
## chlorophyll -1.610e+00  1.991e-02  -80.86  <2e-16 ***
## ---
## Signif. codes:  0 '***' 0.001 '**' 0.01 '*' 0.05 '.' 0.1 ' ' 1
##
## (Dispersion parameter for poisson family taken to be 1)
##
##      Null deviance: 77725  on 15  degrees of freedom
## Residual deviance: 16006  on 13  degrees of freedom
## AIC: 16170
##
## Number of Fisher Scoring iterations: 5
```

```
shallow.numsp.current <- glm(num.species ~ num.records + current, family = "poisson",
data = shallow)
summary(shallow.numsp.current)
```

```
##
## Call:
## glm(formula = num.species ~ num.records + current, family = "poisson",
##      data = shallow)
##
## Deviance Residuals:
##      Min       1Q   Median       3Q      Max
## -71.570  -28.902   -1.892   16.834   54.011
##
## Coefficients:
##              Estimate Std. Error z value Pr(>|z|)
## (Intercept)  7.802e+00  7.112e-03 1097.03  <2e-16 ***
## num.records  6.242e-05  3.321e-07  187.94  <2e-16 ***
## current      2.769e+00  6.449e-02  42.94  <2e-16 ***
## ---
## Signif. codes:  0 '***' 0.001 '**' 0.01 '*' 0.05 '.' 0.1 ' ' 1
##
## (Dispersion parameter for poisson family taken to be 1)
##
##      Null deviance: 77725  on 15  degrees of freedom
## Residual deviance: 21151  on 13  degrees of freedom
## AIC: 21315
##
## Number of Fisher Scoring iterations: 5
```

```
shallow.numsp.o2.saturate <- glm(num.species ~ num.records + o2.saturate, family
= "poisson", data = shallow)
summary(shallow.numsp.o2.saturate)
```

```
##
## Call:
## glm(formula = num.species ~ num.records + o2.saturate, family = "poisson",
##      data = shallow)
##
## Deviance Residuals:
##      Min       1Q   Median       3Q      Max
## -76.524  -35.726   4.632   16.408   50.325
##
## Coefficients:
##              Estimate Std. Error z value Pr(>|z|)
## (Intercept)  8.225e+00  2.504e-01  32.847  <2e-16 ***
## num.records  7.008e-05  2.773e-07  252.696  <2e-16 ***
## o2.saturate -2.373e-03  2.474e-03  -0.959   0.337
## ---
## Signif. codes:  0 '***' 0.001 '**' 0.01 '*' 0.05 '.' 0.1 ' ' 1
##
## (Dispersion parameter for poisson family taken to be 1)
##
## Null deviance: 77725  on 15  degrees of freedom
## Residual deviance: 22878  on 13  degrees of freedom
## AIC: 23042
##
## Number of Fisher Scoring iterations: 5
```

```
shallow.numsp.salinity <- glm(num.species ~ num.records + salinity, family = "poi
sson", data = shallow)
summary(shallow.numsp.salinity)
```



```
##
## Call:
## glm(formula = num.species ~ num.records + salinity, family = "poisson",
##      data = shallow)
##
## Deviance Residuals:
##      Min       1Q   Median       3Q      Max
## -54.003  -14.680   4.552   11.755   34.503
##
## Coefficients:
##              Estimate Std. Error z value Pr(>|z|)
## (Intercept) -3.139e+00  1.063e-01 -29.52  <2e-16 ***
## num.records  6.123e-05  3.193e-07  191.77  <2e-16 ***
## salinity     3.356e-01  3.166e-03  106.01  <2e-16 ***
## ---
## Signif. codes:  0 '***' 0.001 '**' 0.01 '*' 0.05 '.' 0.1 ' ' 1
##
## (Dispersion parameter for poisson family taken to be 1)
##
## Null deviance: 77725.1  on 15  degrees of freedom
## Residual deviance: 9843.3 on 13  degrees of freedom
## AIC: 10008
##
## Number of Fisher Scoring iterations: 5
```

```
shallow.numsp.nitrate <- glm(num.species ~ num.records + nitrate, family = "poisson",
data = shallow)
summary(shallow.numsp.nitrate)
```

```
##
## Call:
## glm(formula = num.species ~ num.records + nitrate, family = "poisson",
##      data = shallow)
##
## Deviance Residuals:
##      Min       1Q   Median       3Q      Max
## -79.989  -29.903   3.061   19.810   45.032
##
## Coefficients:
##              Estimate Std. Error z value Pr(>|z|)
## (Intercept)  8.312e+00  7.430e-03 1118.66  <2e-16 ***
## num.records  5.822e-05  3.415e-07  170.50  <2e-16 ***
## nitrate     -5.945e-02  1.016e-03  -58.55  <2e-16 ***
## ---
## Signif. codes:  0 '***' 0.001 '**' 0.01 '*' 0.05 '.' 0.1 ' ' 1
##
## (Dispersion parameter for poisson family taken to be 1)
##
## Null deviance: 77725  on 15  degrees of freedom
## Residual deviance: 19093 on 13  degrees of freedom
## AIC: 19257
##
## Number of Fisher Scoring iterations: 5
```

# Model selection for number of species, shallow water

Here we use AIC to compare models for goodness of fit while penalizing for overparameterization. Models are ranked in order of AIC score, with lowest scoring model (model with the best compromise between fit and complexity) first in the list. The delta AIC represents how much the AIC score for each model differs from the top model, and can be used as an estimate of the relative support for each model. A delta AIC of 2 is considered to be potentially a significantly better fit, with higher delta AICs between models indicating increasingly larger differences in model fit while correcting for the number of parameters.

```
shallow.numsp.models <- list(shallow.numsp.intercept = shallow.numsp.intercept,  
                             shallow.numsp.temp = shallow.numsp.temp,  
                             shallow.numsp.oxygen = shallow.numsp.oxygen,  
                             shallow.numsp.prod = shallow.numsp.prod,  
                             shallow.numsp.chlorophyll = shallow.numsp.chlorophyll,  
                             shallow.numsp.numrec = shallow.numsp.numrec,  
                             shallow.numsp.current = shallow.numsp.current,  
                             shallow.numsp.o2.saturate = shallow.numsp.o2.saturate,  
                             shallow.numsp.salinity = shallow.numsp.salinity,  
                             shallow.numsp.nitrate = shallow.numsp.nitrate)  
shallow.numsp.aic.df <- data.frame(Model = names(shallow.numsp.models),  
                                   AIC = sapply(shallow.numsp.models, function(x) AICc  
(x)),  
                                   akaike.weights(sapply(shallow.numsp.models, function(x)  
AICc(x))))  
  
shallow.numsp.aic.df <- shallow.numsp.aic.df[order(shallow.numsp.aic.df$AIC),]  
shallow.numsp.aic.df$Cumulative.Weight <- cumsum(shallow.numsp.aic.df$weights)  
  
kable(shallow.numsp.aic.df, row.names = FALSE)
```

| Model                     | AIC      | deltaAIC  | rel.LL | weights | Cumulative.Weight |
|---------------------------|----------|-----------|--------|---------|-------------------|
| shallow.numsp.salinity    | 10009.54 | 0.000     | 1      | 1       | 1                 |
| shallow.numsp.oxygen      | 12606.98 | 2597.441  | 0      | 0       | 1                 |
| shallow.numsp.temp        | 14827.07 | 4817.526  | 0      | 0       | 1                 |
| shallow.numsp.chlorophyll | 16172.16 | 6162.624  | 0      | 0       | 1                 |
| shallow.numsp.nitrate     | 19259.05 | 9249.507  | 0      | 0       | 1                 |
| shallow.numsp.current     | 21316.87 | 11307.335 | 0      | 0       | 1                 |
| shallow.numsp.prod        | 22502.95 | 12493.406 | 0      | 0       | 1                 |
| shallow.numsp.numrec      | 23042.10 | 13032.562 | 0      | 0       | 1                 |
| shallow.numsp.o2.saturate | 23044.26 | 13034.719 | 0      | 0       | 1                 |
| shallow.numsp.intercept   | 77885.64 | 67876.100 | 0      | 0       | 1                 |

```
write.csv(shallow.numsp.aic.df, file = "shallow.5.degree.numsp.aic.csv")
```

Here we see that the model containing salinity is the best fit, but many other models are almost as good. It is particularly noteworthy that the model containing only the effects of sampling (the “numrec” model) has a delta AIC of < 2 compared to the best-performing model. This indicates that a model that contains only sampling effort is for all practical purposes as good as any model that contains an environmental predictor. As such, we cannot with confidence say that any environmental predictor is useful in explaining the number of species.

## Plots for number of species, shallow water

Here we plot the effects of each environmental predictor from its respective single-variable model.

```
qplot(shallow$temp, predict(shallow.numsp.temp, shallow)) + geom_smooth(method = "glm")
```

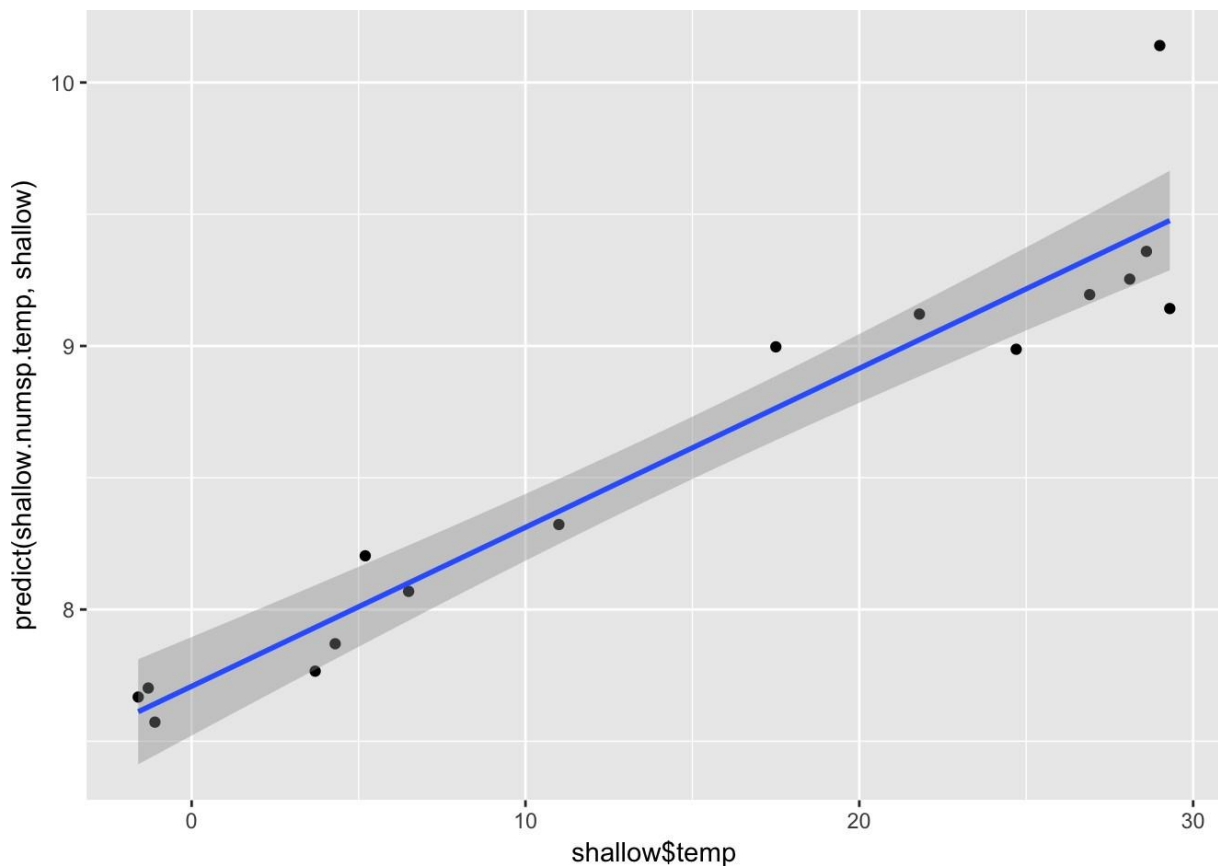

```
qplot(shallow$num.species, predict(shallow.numsp.numrec, shallow)) + geom_smooth(method = "glm")
```

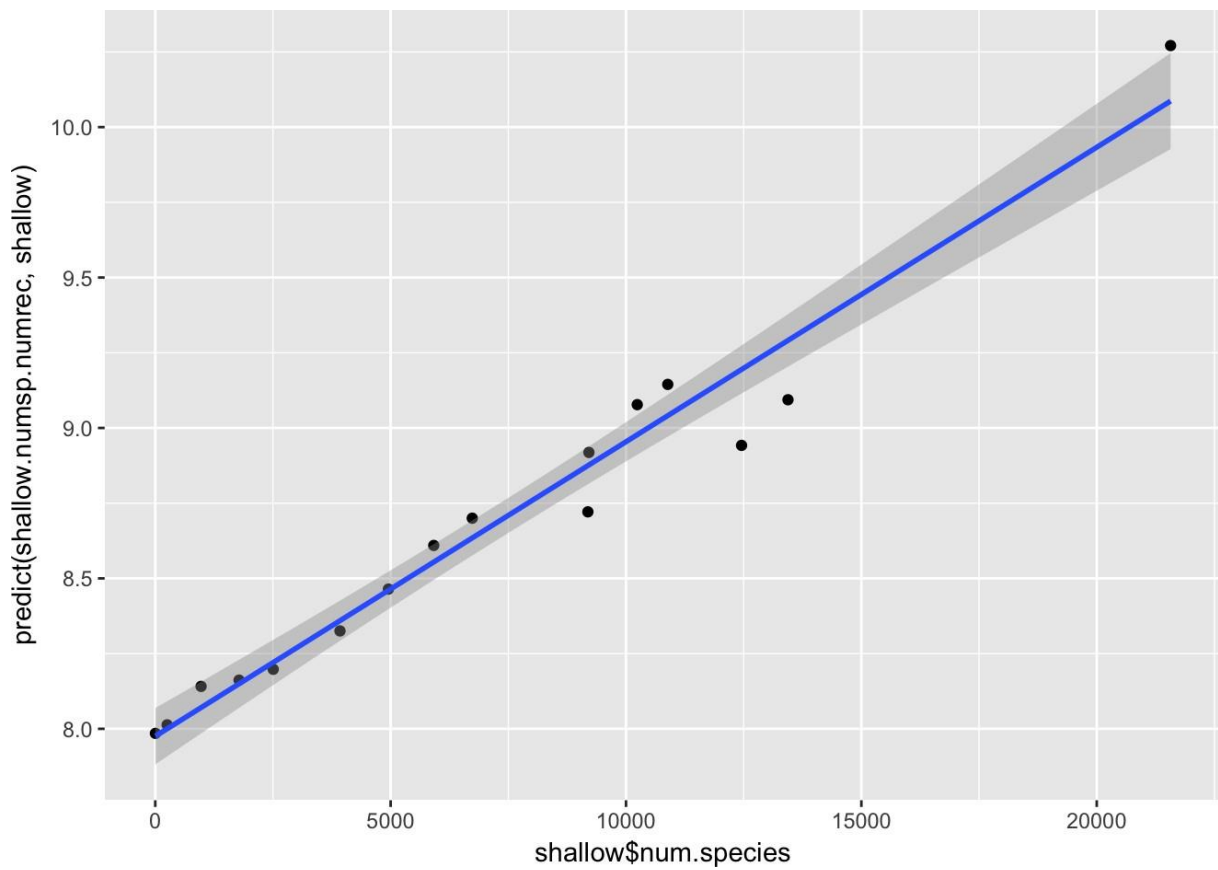

```
qplot(shallow$primary.productivity, predict(shallow.numsp.prod, shallow)) + geom_smooth(method = "glm")
```

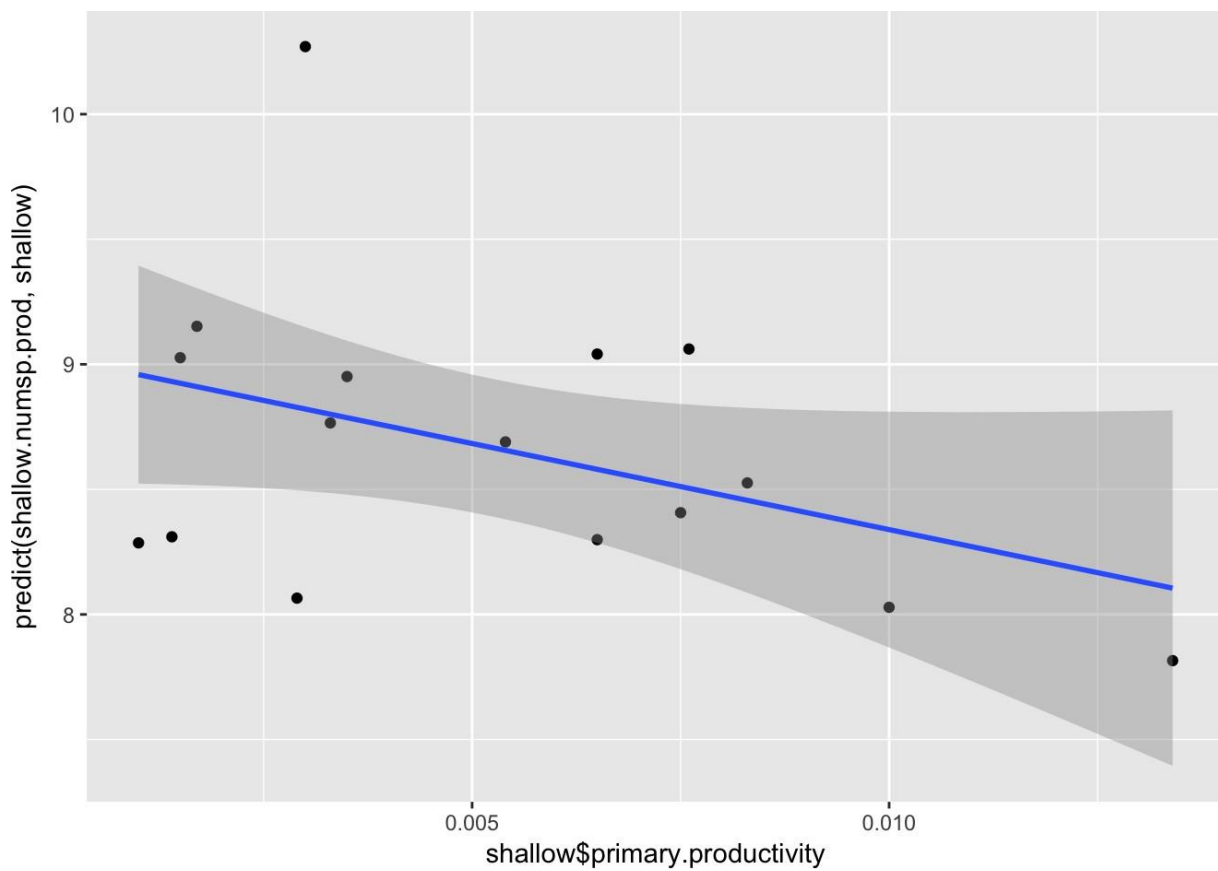

```
qplot(shallow$dissolved.oxygen, predict(shallow.numsp.oxygen, shallow)) + geom_smooth(method = "glm")
```

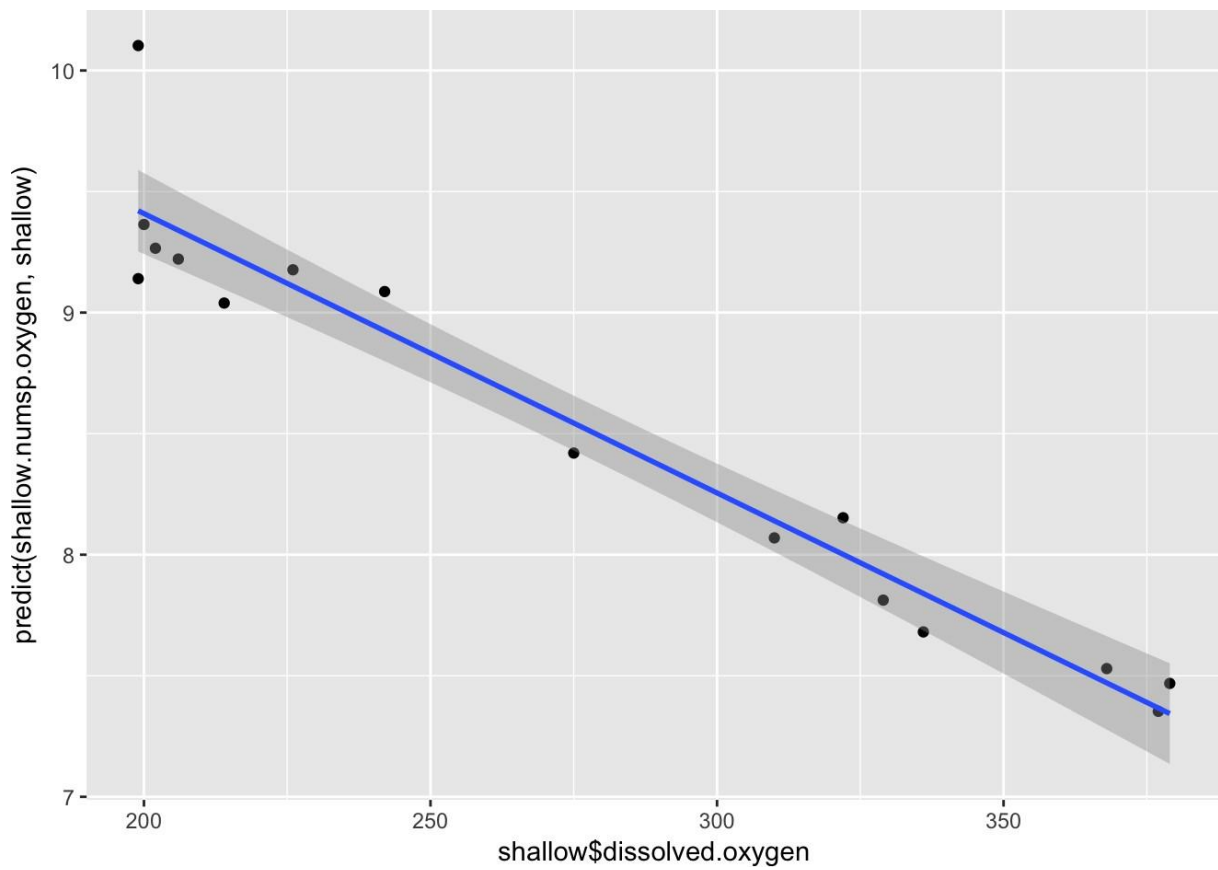

```
qplot(shallow$chlorophyll, predict(shallow.numsp.chlorophyll, shallow)) + geom_smooth(
  method = "glm")
```

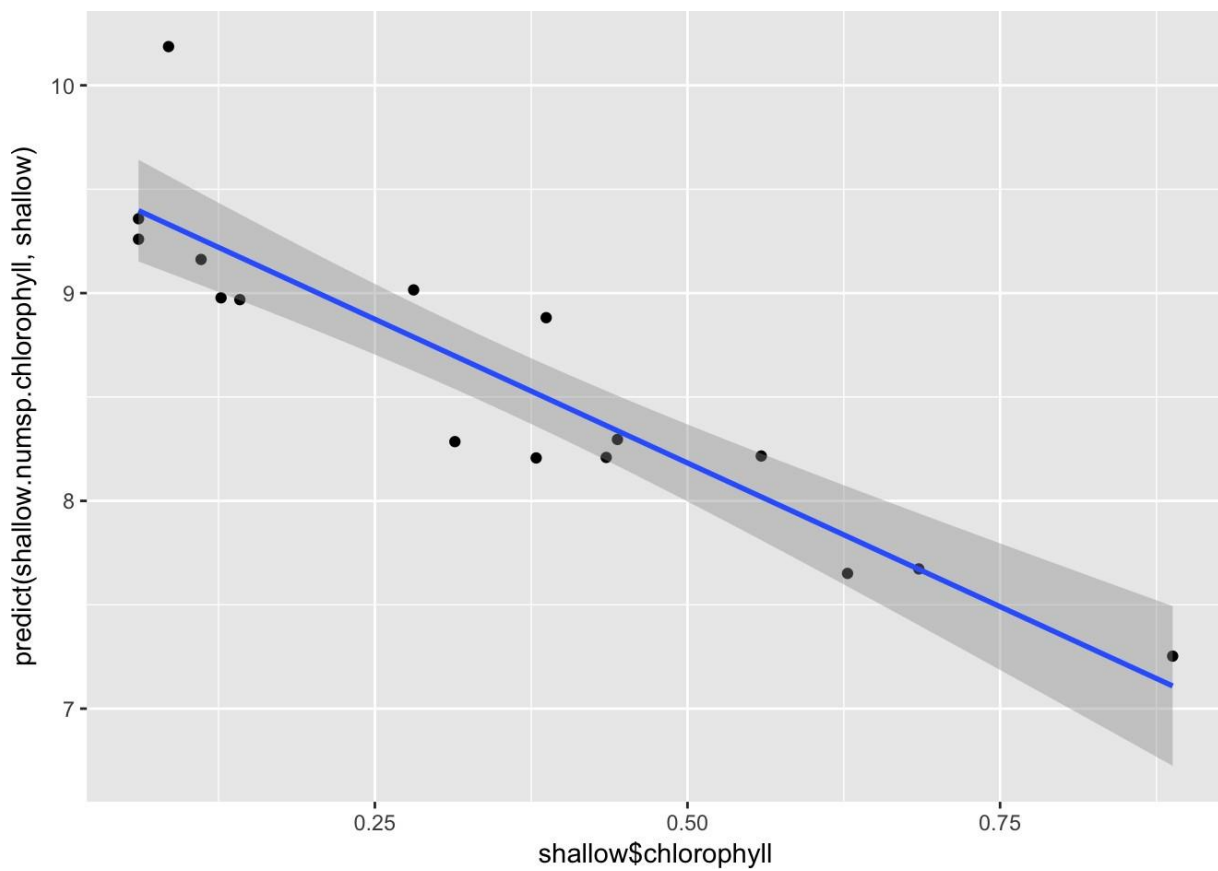

```
qplot(shallow$current, predict(shallow.numsp.current, shallow)) + geom_smooth(metho
  d = "glm")
```

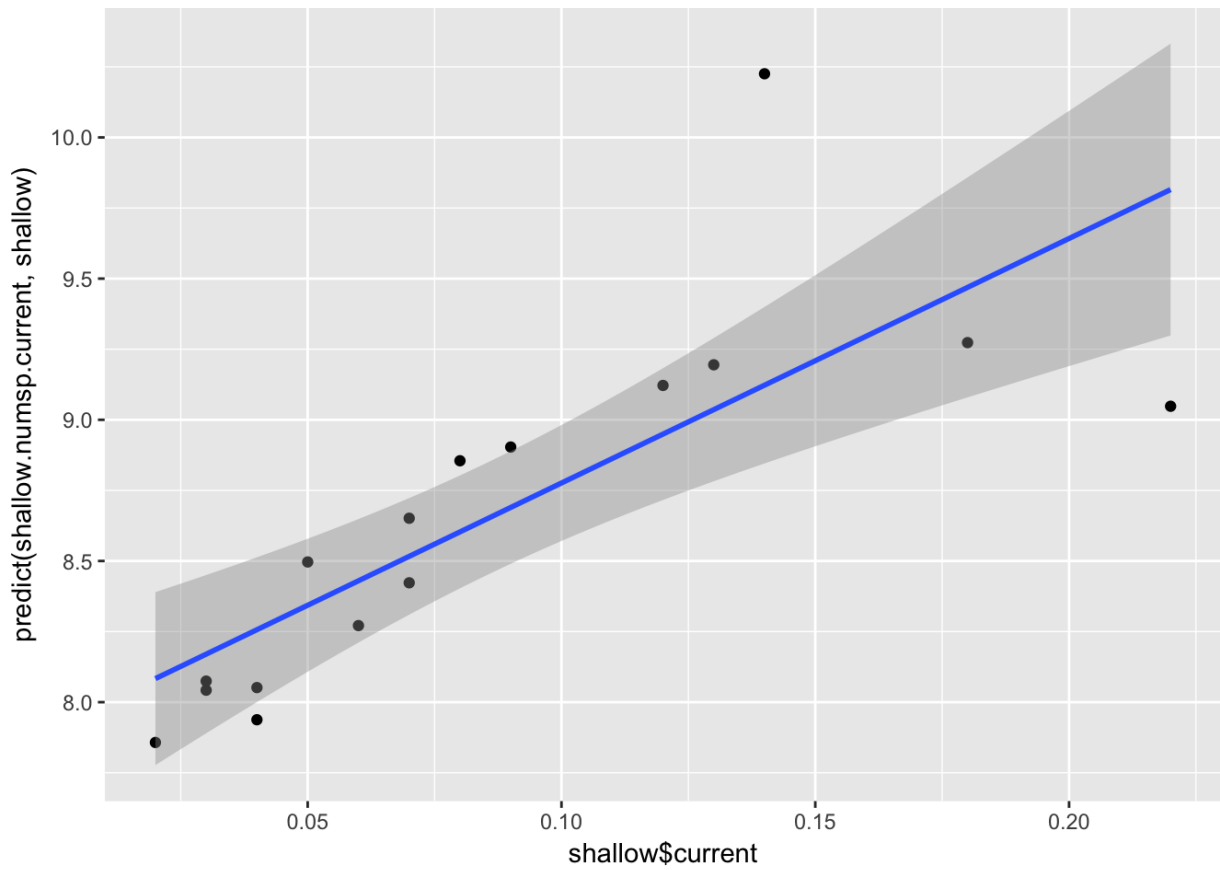

```
qplot(shallow$o2.saturnate, predict(shallow.numsp.o2.saturnate, shallow)) + geom_smooth(
  method = "glm")
```

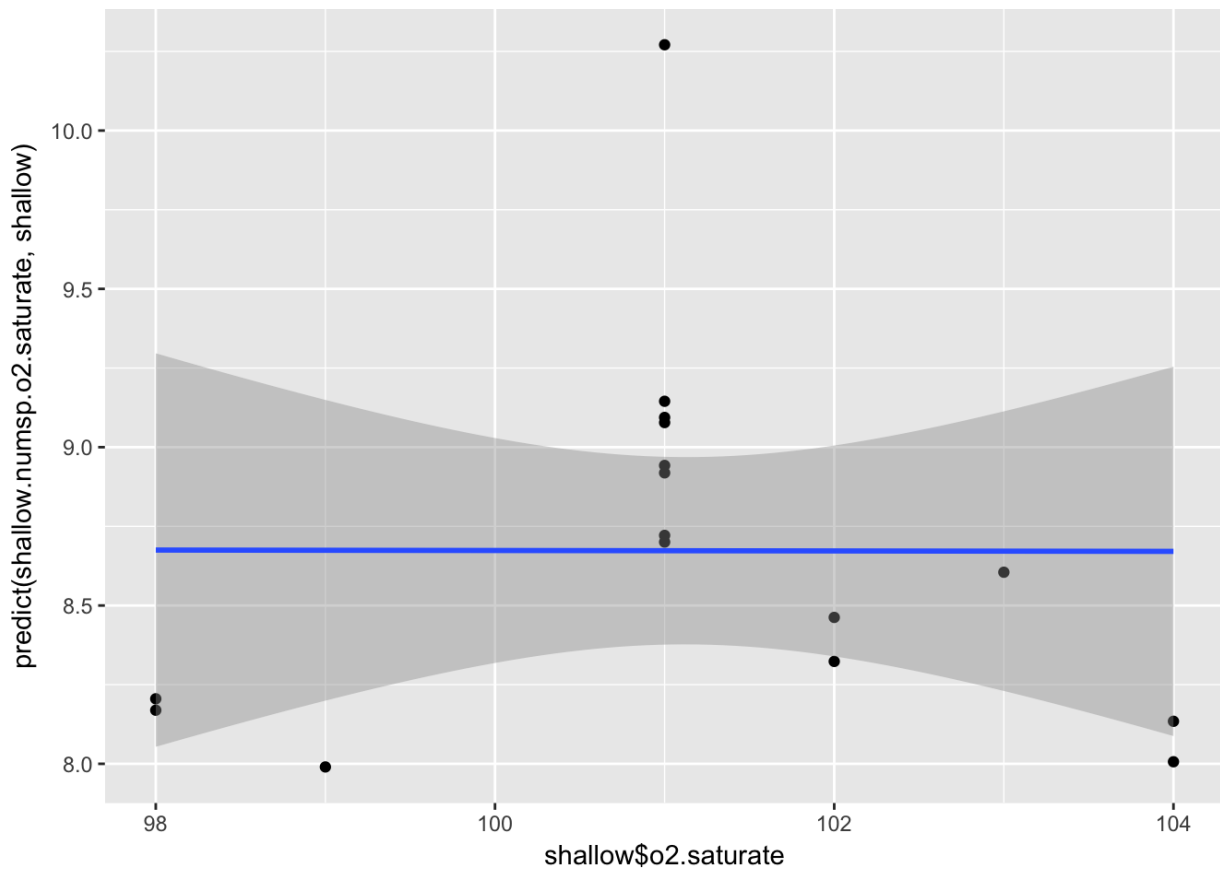

```
qplot(shallow$salinity, predict(shallow.numsp.salinity, shallow)) + geom_smooth(
  method = "glm")
```

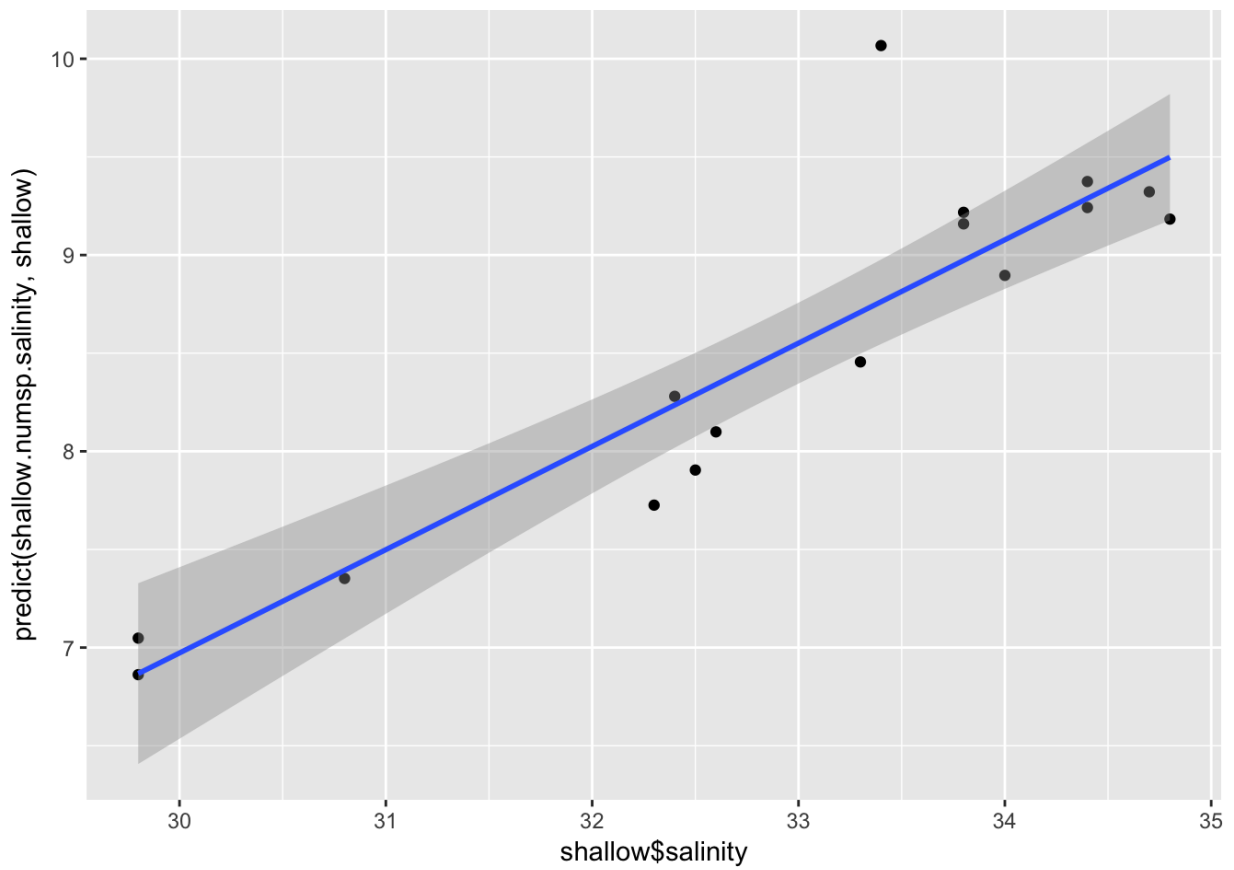

```
qplot(shallow$nitrate, predict(shallow.numsp.nitrate, shallow)) + geom_smooth(metho
d = "glm")
```

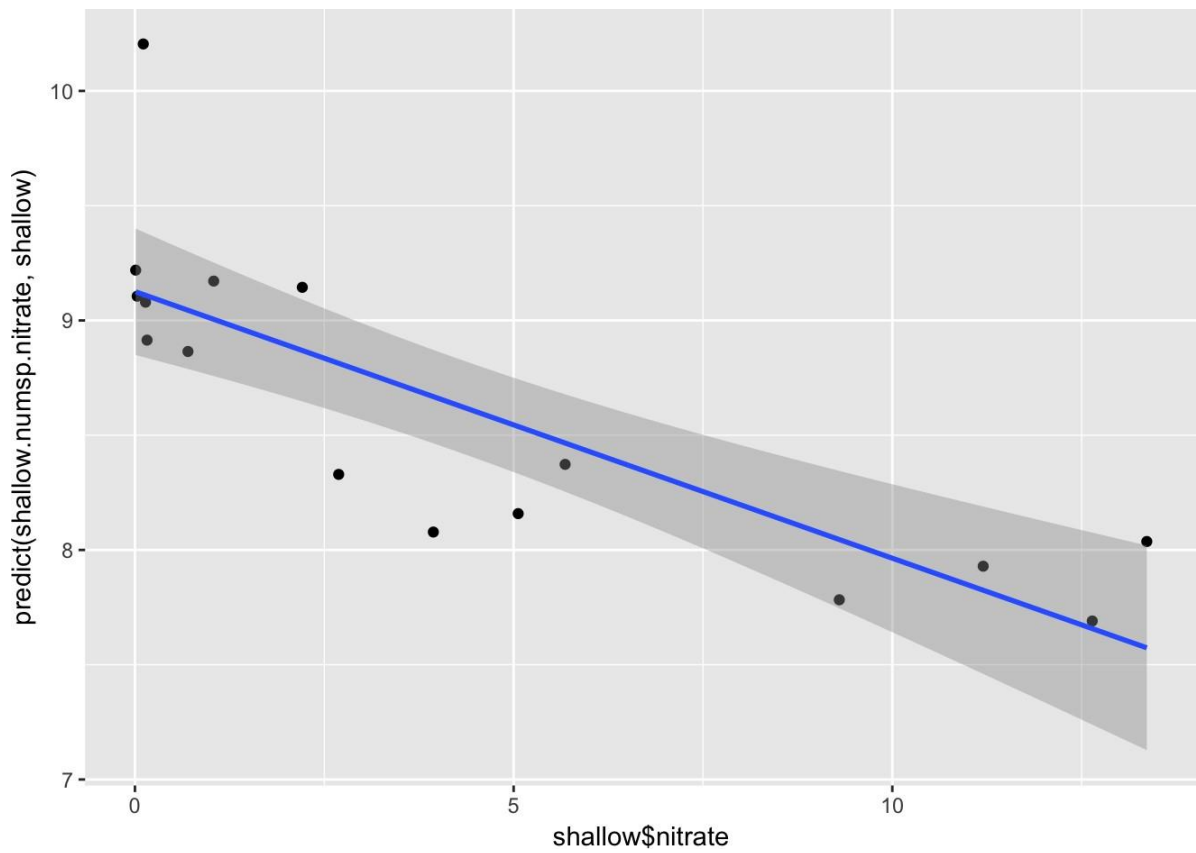

# GLMs for ES50, shallow water

These models are identical to the above, except that the response variable is the species richness estimated from the rarefaction curves. These are meant to be estimates of species richness if all sites were sampled equally. Since these measurements are intended to take sampling effort into account, we exclude the "num.records" term for these models.

```
shallow.es50.intercept <- glm(ES50 ~ 1, family = "poisson", data = shallow)
summary(shallow.es50.intercept)
```

```
##
## Call:
## glm(formula = ES50 ~ 1, family = "poisson", data = shallow)
##
## Deviance Residuals:
##      Min       1Q   Median       3Q      Max
## -3.6830  -0.5683  -0.1248   0.4342   3.1278
##
## Coefficients:
##              Estimate Std. Error z value Pr(>|z|)
## (Intercept)  2.52072    0.07089   35.56 <2e-16 ***
## ---
## Signif. codes:  0 '***' 0.001 '**' 0.01 '*' 0.05 '.' 0.1 ' ' 1
##
## (Dispersion parameter for poisson family taken to be 1)
##
## Null deviance: 30.953  on 15  degrees of freedom
## Residual deviance: 30.953  on 15  degrees of freedom
## AIC: 101.37
##
## Number of Fisher Scoring iterations: 4
```

```
shallow.es50.temp <- glm(ES50 ~ temp, family = "poisson", data = shallow)
summary(shallow.es50.temp)
```



```
##
## Call:
## glm(formula = ES50 ~ temp, family = "poisson", data = shallow)
##
## Deviance Residuals:
##      Min       1Q   Median       3Q      Max
## -4.0864  -0.4847   0.0168   0.4444   2.5418
##
## Coefficients:
##              Estimate Std. Error z value Pr(>|z|)
## (Intercept)   2.648781   0.106161  24.951 <2e-16 ***
## temp         -0.009224   0.005973  -1.544   0.122
## ---
## Signif. codes:  0 '***' 0.001 '**' 0.01 '*' 0.05 '.' 0.1 ' ' 1
##
## (Dispersion parameter for poisson family taken to be 1)
##
## Null deviance: 30.953  on 15  degrees of freedom
## Residual deviance: 28.559  on 14  degrees of freedom
## AIC: 100.98
##
## Number of Fisher Scoring iterations: 4
```

```
shallow.es50.oxygen <- glm(ES50 ~ dissolved.oxygen, family = "poisson", data = shallow)
summary(shallow.es50.oxygen)
```

```
##
## Call:
## glm(formula = ES50 ~ dissolved.oxygen, family = "poisson", data = shallow)
##
## Deviance Residuals:
##      Min       1Q   Median       3Q      Max
## -4.1101  -0.4847  -0.0217   0.5021   2.5835
##
## Coefficients:
##              Estimate Std. Error z value Pr(>|z|)
## (Intercept)   2.113708   0.297882   7.096 1.29e-12 ***
## dissolved.oxygen 0.001467   0.001030   1.424   0.154
## ---
## Signif. codes:  0 '***' 0.001 '**' 0.01 '*' 0.05 '.' 0.1 ' ' 1
##
## (Dispersion parameter for poisson family taken to be 1)
##
## Null deviance: 30.953  on 15  degrees of freedom
## Residual deviance: 28.934  on 14  degrees of freedom
## AIC: 101.36
##
## Number of Fisher Scoring iterations: 5
```

```
shallow.es50.prod <- glm(ES50 ~ primary.productivity, family = "poisson", data = shallow)
summary(shallow.es50.prod)
```

```
##
## Call:
## glm(formula = ES50 ~ primary.productivity, family = "poisson",
##      data = shallow)
##
## Deviance Residuals:
##      Min       1Q   Median       3Q      Max
## -3.7981  -0.6577   0.1055   0.4421   2.8239
##
## Coefficients:
##              Estimate Std. Error z value Pr(>|z|)
## (Intercept)      2.6137     0.1272  20.542 <2e-16 ***
## primary.productivity -18.1957     21.0964  -0.863   0.388
## ---
## Signif. codes:  0 '***' 0.001 '**' 0.01 '*' 0.05 '.' 0.1 ' ' 1
##
## (Dispersion parameter for poisson family taken to be 1)
##
## Null deviance: 30.953  on 15  degrees of freedom
## Residual deviance: 30.197  on 14  degrees of freedom
## AIC: 102.62
##
## Number of Fisher Scoring iterations: 4
```

```
shallow.es50.chlorophyll <- glm(ES50 ~ chlorophyll, family = "poisson", data = shallow)
summary(shallow.es50.chlorophyll)
```

```
##
## Call:
## glm(formula = ES50 ~ chlorophyll, family = "poisson", data = shallow)
##
## Deviance Residuals:
##      Min       1Q   Median       3Q      Max
## -3.5850  -0.6251  -0.0227   0.3515   3.1121
##
## Coefficients:
##              Estimate Std. Error z value Pr(>|z|)
## (Intercept)    2.5634     0.1236  20.746 <2e-16 ***
## chlorophyll   -0.1234     0.2959  -0.417   0.677
## ---
## Signif. codes:  0 '***' 0.001 '**' 0.01 '*' 0.05 '.' 0.1 ' ' 1
##
## (Dispersion parameter for poisson family taken to be 1)
##
## Null deviance: 30.953  on 15  degrees of freedom
## Residual deviance: 30.778  on 14  degrees of freedom
## AIC: 103.2
##
## Number of Fisher Scoring iterations: 4
```

```
shallow.es50.current <- glm(ES50 ~ current, family = "poisson", data = shallow)
summary(shallow.es50.current)
```

```
##
## Call:
## glm(formula = ES50 ~ current, family = "poisson", data = shallow)
##
## Deviance Residuals:
##      Min       1Q   Median       3Q      Max
## -3.9141  -0.4697   0.0144   0.5715   2.8536
##
## Coefficients:
##              Estimate Std. Error z value Pr(>|z|)
## (Intercept)   2.6260     0.1285  20.436 <2e-16 ***
## current      -1.2585     1.3101  -0.961   0.337
## ---
## Signif. codes:  0 '***' 0.001 '**' 0.01 '*' 0.05 '.' 0.1 ' ' 1
##
## (Dispersion parameter for poisson family taken to be 1)
##
## Null deviance: 30.953  on 15  degrees of freedom
## Residual deviance: 30.008  on 14  degrees of freedom
## AIC: 102.43
##
## Number of Fisher Scoring iterations: 4
```

```
shallow.es50.o2.saturate <- glm(ES50 ~ o2.saturate, family = "poisson", data = shallow)
summary(shallow.es50.o2.saturate)
```

```
##
## Call:
## glm(formula = ES50 ~ o2.saturate, family = "poisson", data = shallow)
##
## Deviance Residuals:
##      Min       1Q   Median       3Q      Max
## -4.1129  -0.4209   0.1394   0.4739   2.2156
##
## Coefficients:
##              Estimate Std. Error z value Pr(>|z|)
## (Intercept)   9.87123     4.18524   2.359  0.0183 *
## o2.saturate -0.07276     0.04147  -1.755  0.0793 .
## ---
## Signif. codes:  0 '***' 0.001 '**' 0.01 '*' 0.05 '.' 0.1 ' ' 1
##
## (Dispersion parameter for poisson family taken to be 1)
##
## Null deviance: 30.953  on 15  degrees of freedom
## Residual deviance: 27.895  on 14  degrees of freedom
## AIC: 100.32
##
## Number of Fisher Scoring iterations: 4
```

```
shallow.es50.salinity <- glm(ES50 ~ salinity, family = "poisson", data = shallow)
summary(shallow.es50.salinity)
```

```
##
## Call:
## glm(formula = ES50 ~ salinity, family = "poisson", data = shallow)
##
## Deviance Residuals:
##      Min       1Q   Median       3Q      Max
## -4.1826  -0.3624   0.0295   0.5597   2.6606
##
## Coefficients:
##              Estimate Std. Error z value Pr(>|z|)
## (Intercept)  4.34860    1.44031   3.019  0.00253 **
## salinity     -0.05563    0.04388  -1.268  0.20484
## ---
## Signif. codes:  0 '***' 0.001 '**' 0.01 '*' 0.05 '.' 0.1 ' ' 1
##
## (Dispersion parameter for poisson family taken to be 1)
##
## Null deviance: 30.953  on 15  degrees of freedom
## Residual deviance: 29.379  on 14  degrees of freedom
## AIC: 101.8
##
## Number of Fisher Scoring iterations: 5
```

```
shallow.es50.nitrate <- glm(ES50 ~ nitrate, family = "poisson", data = shallow)
summary(shallow.es50.nitrate)
```

```
##
## Call:
## glm(formula = ES50 ~ nitrate, family = "poisson", data = shallow)
##
## Deviance Residuals:
##      Min       1Q   Median       3Q      Max
## -3.6731  -0.4479  -0.1586   0.4444   3.1042
##
## Coefficients:
##              Estimate Std. Error z value Pr(>|z|)
## (Intercept)  2.484316    0.097391  25.509  <2e-16 ***
## nitrate      0.008352    0.015006   0.557   0.578
## ---
## Signif. codes:  0 '***' 0.001 '**' 0.01 '*' 0.05 '.' 0.1 ' ' 1
##
## (Dispersion parameter for poisson family taken to be 1)
##
## Null deviance: 30.953  on 15  degrees of freedom
## Residual deviance: 30.646  on 14  degrees of freedom
## AIC: 103.07
##
## Number of Fisher Scoring iterations: 4
```

## Model selection for ES50, shallow water

Here we use AIC to compare models for goodness of fit while penalizing for overparameterization. Models are ranked in order of AIC score, with lowest scoring model (model with the best compromise between fit and complexity) first in the list. The delta AIC represents how much the

AIC score for each model differs from the top model, and can be used as an estimate of the relative support for each model. A delta AIC of 2 is considered to be potentially a significantly better fit, with higher delta AICs between models indicating increasingly larger differences in model fit while correcting for the number of parameters.

```
shallow.es50.models <- list(shallow.es50.intercept = shallow.es50.intercept,
                           shallow.es50.temp = shallow.es50.temp,
                           shallow.es50.oxygen = shallow.es50.oxygen,
                           shallow.es50.prod = shallow.es50.prod,
                           shallow.es50.chlorophyll = shallow.es50.chlorophyll,
                           shallow.es50.current = shallow.es50.current,
                           shallow.es50.o2.saturate = shallow.es50.o2.saturate,
                           shallow.es50.salinity = shallow.es50.salinity,
                           shallow.es50.nitrate = shallow.es50.nitrate)
shallow.es50.aic.df <- data.frame(Model = names(shallow.es50.models),
                                 AIC = sapply(shallow.es50.models, function(x) AICc
(×)),
                                 akaike.weights(sapply(shallow.es50.models, function(x)
AICc(x))))
shallow.es50.aic.df <- shallow.es50.aic.df[order(shallow.es50.aic.df$AIC),]
shallow.es50.aic.df$Cumulative.Weight <- cumsum(shallow.es50.aic.df$weights)

kable(shallow.es50.aic.df, row.names = FALSE)
```

| Model                    | AIC      | deltaAIC  | rel.LL    | weights   | Cumulative.Weight |
|--------------------------|----------|-----------|-----------|-----------|-------------------|
| shallow.es50.o2.saturate | 101.2391 | 0.0000000 | 1.0000000 | 0.2104438 | 0.2104438         |
| shallow.es50.intercept   | 101.6597 | 0.4206558 | 0.8103185 | 0.1705265 | 0.3809704         |
| shallow.es50.temp        | 101.9027 | 0.6636585 | 0.7176098 | 0.1510166 | 0.5319869         |
| shallow.es50.oxygen      | 102.2781 | 1.0390737 | 0.5947960 | 0.1251711 | 0.6571581         |
| shallow.es50.salinity    | 102.7235 | 1.4843970 | 0.4760661 | 0.1001852 | 0.7573432         |
| shallow.es50.current     | 103.3525 | 2.1133812 | 0.3476043 | 0.0731512 | 0.8304944         |
| shallow.es50.prod        | 103.5417 | 2.3026027 | 0.3162250 | 0.0665476 | 0.8970420         |
| shallow.es50.nitrate     | 103.9905 | 2.7513899 | 0.2526639 | 0.0531716 | 0.9502136         |
| shallow.es50.chlorophyll | 104.1220 | 2.8829527 | 0.2365782 | 0.0497864 | 1.0000000         |

```
write.csv(shallow.es50.aic.df, file = "shallow.5.degree.es50.aic.csv")
```

Here we see that the model containing only the intercept is the best fit, indicating no support for any environmental variable as a useful predictor of ES50 in shallow water.

## Plots for ES50, shallow water

Here we plot the effects of each environmental predictor from its respective single-variable model.

```
qplot(shallow$temp, shallow$ES50) + geom_smooth(method = "glm")
```

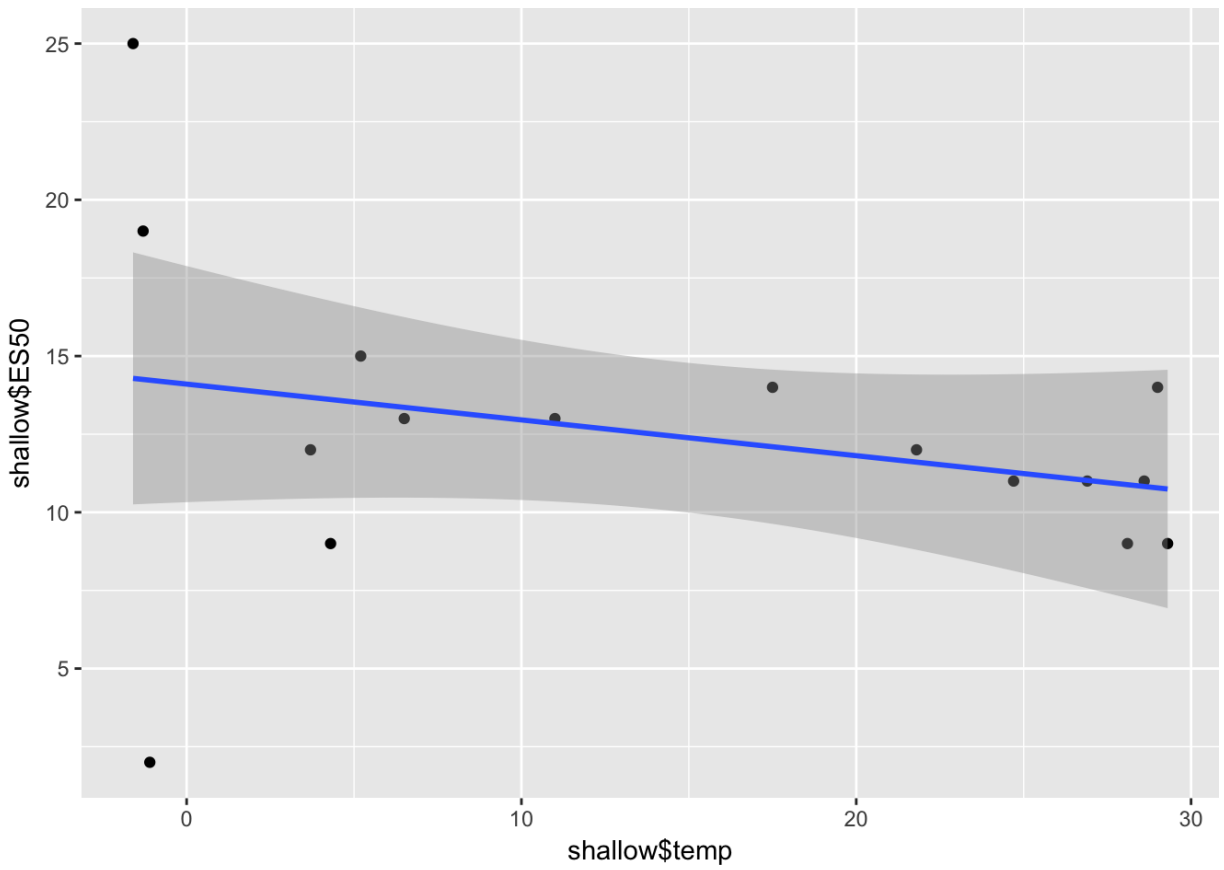

```
qplot(shallow$num.records, shallow$ES50) + geom_smooth(method = "glm")
```

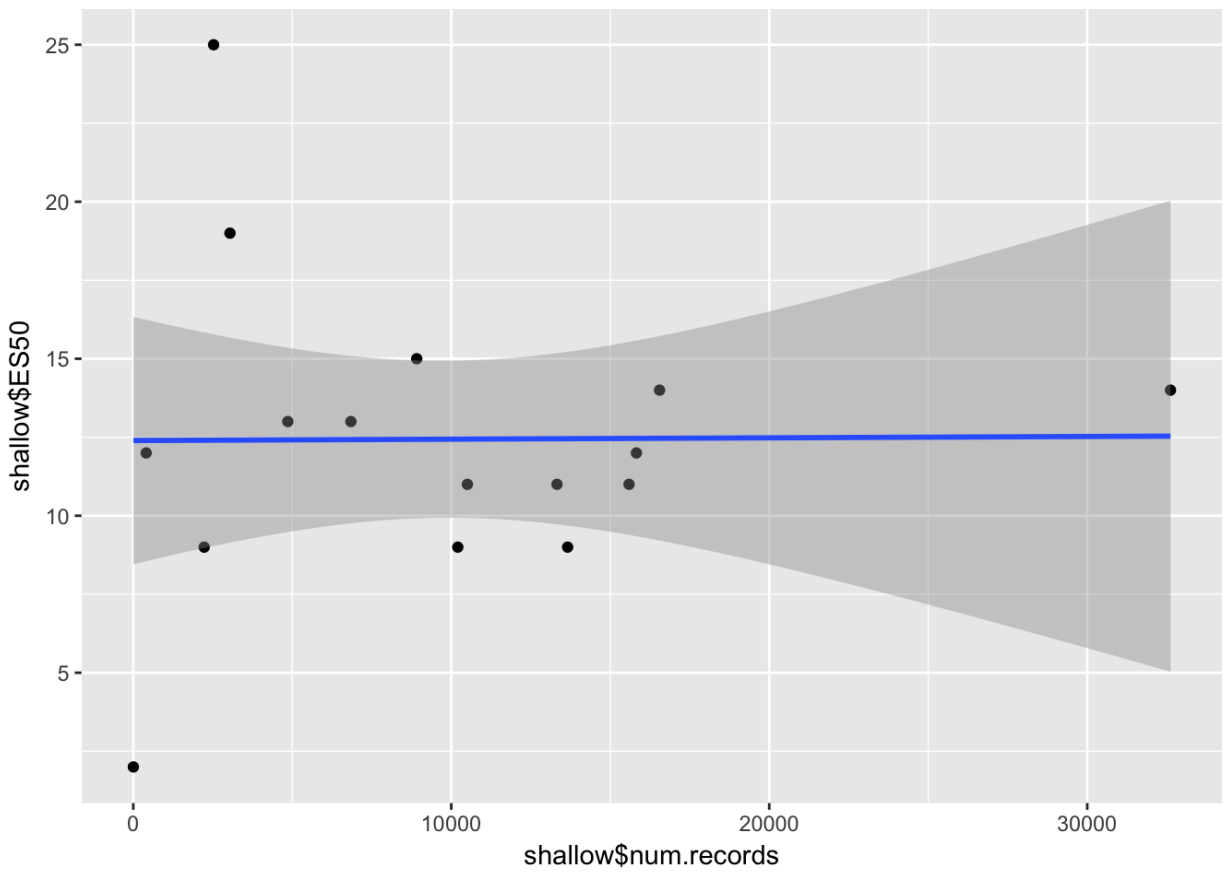

```
qplot(shallow$primary.productivity, shallow$ES50) + geom_smooth(method = "glm")
```

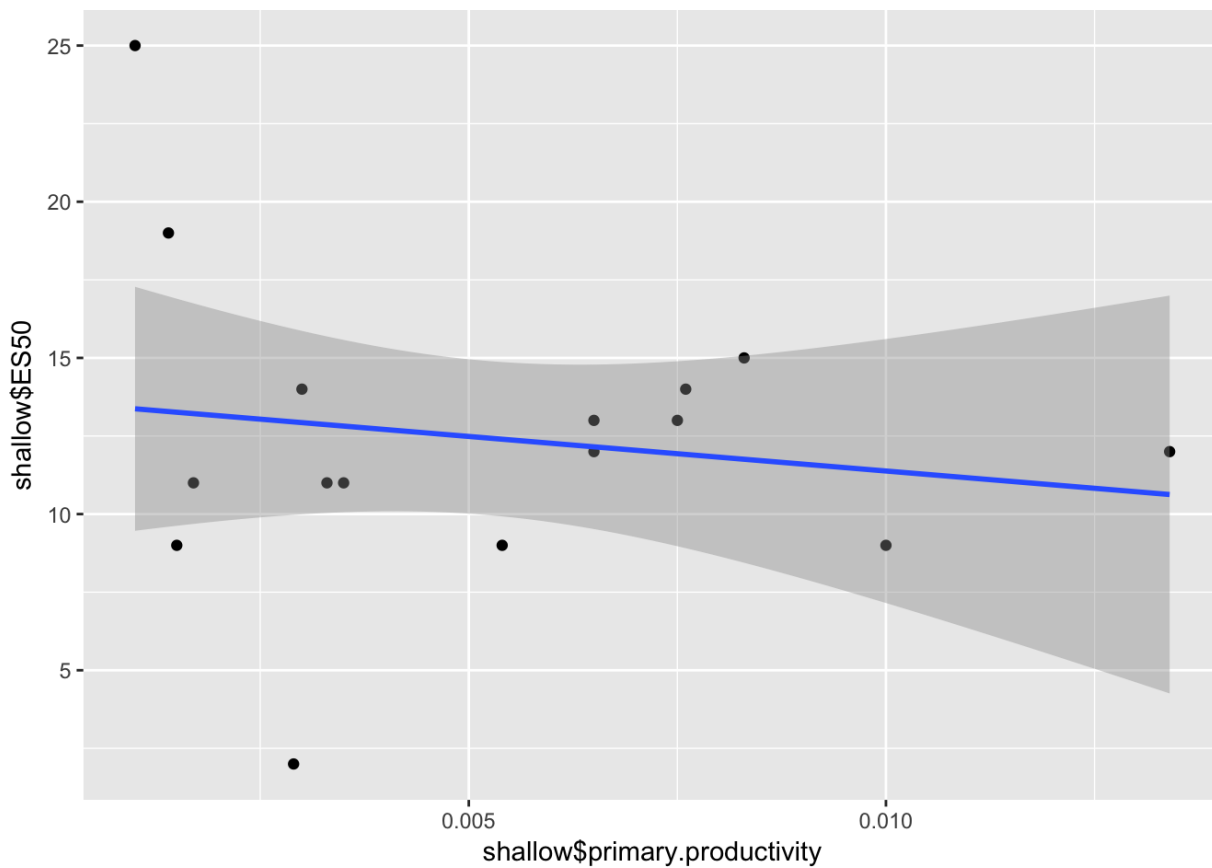

```
qplot(shallow$dissolved.oxygen, shallow$ES50) + geom_smooth(method = "glm")
```

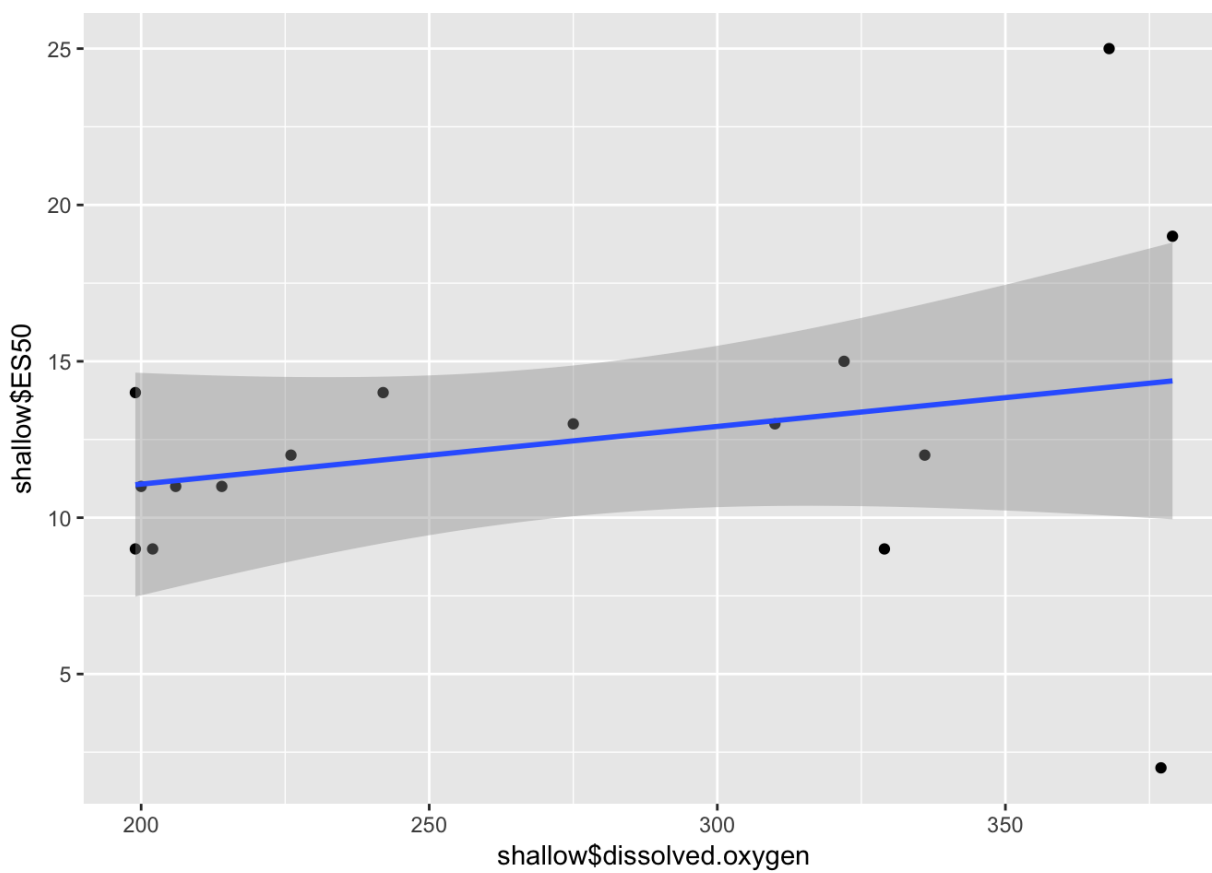

```
qplot(shallow$chlorophyll, shallow$ES50) + geom_smooth(method = "glm")
```

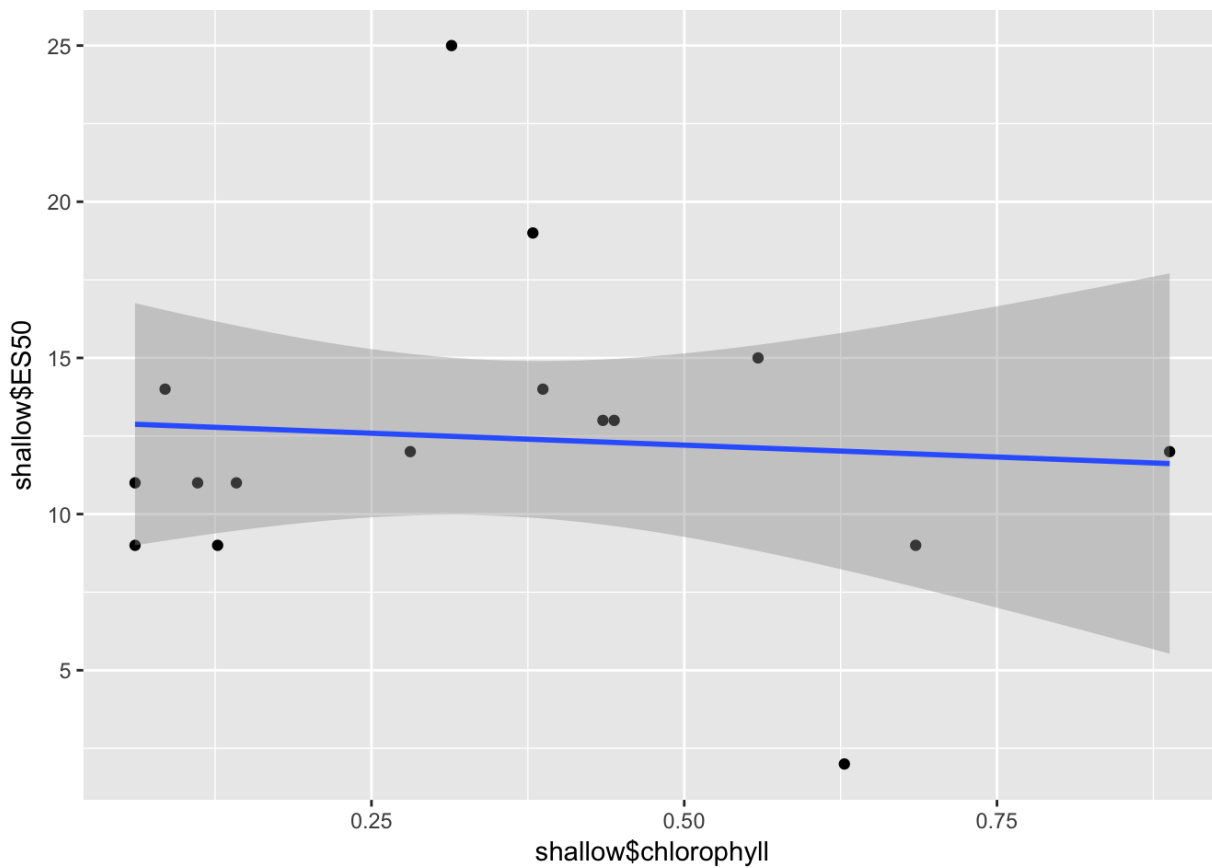

```
qplot(shallow$current, shallow$ES50) + geom_smooth(method = "glm")
```

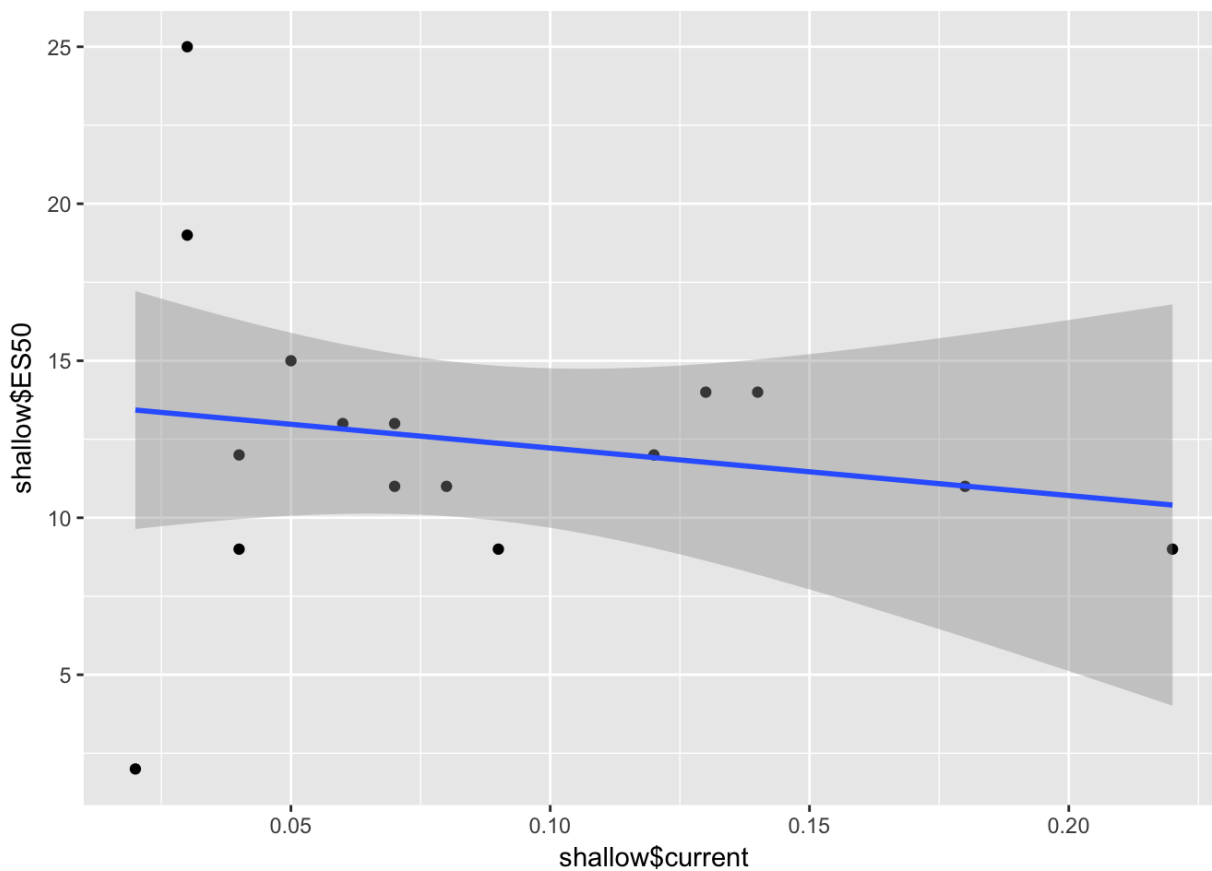

```
qplot(shallow$o2.saturation, shallow$ES50) + geom_smooth(method = "glm")
```



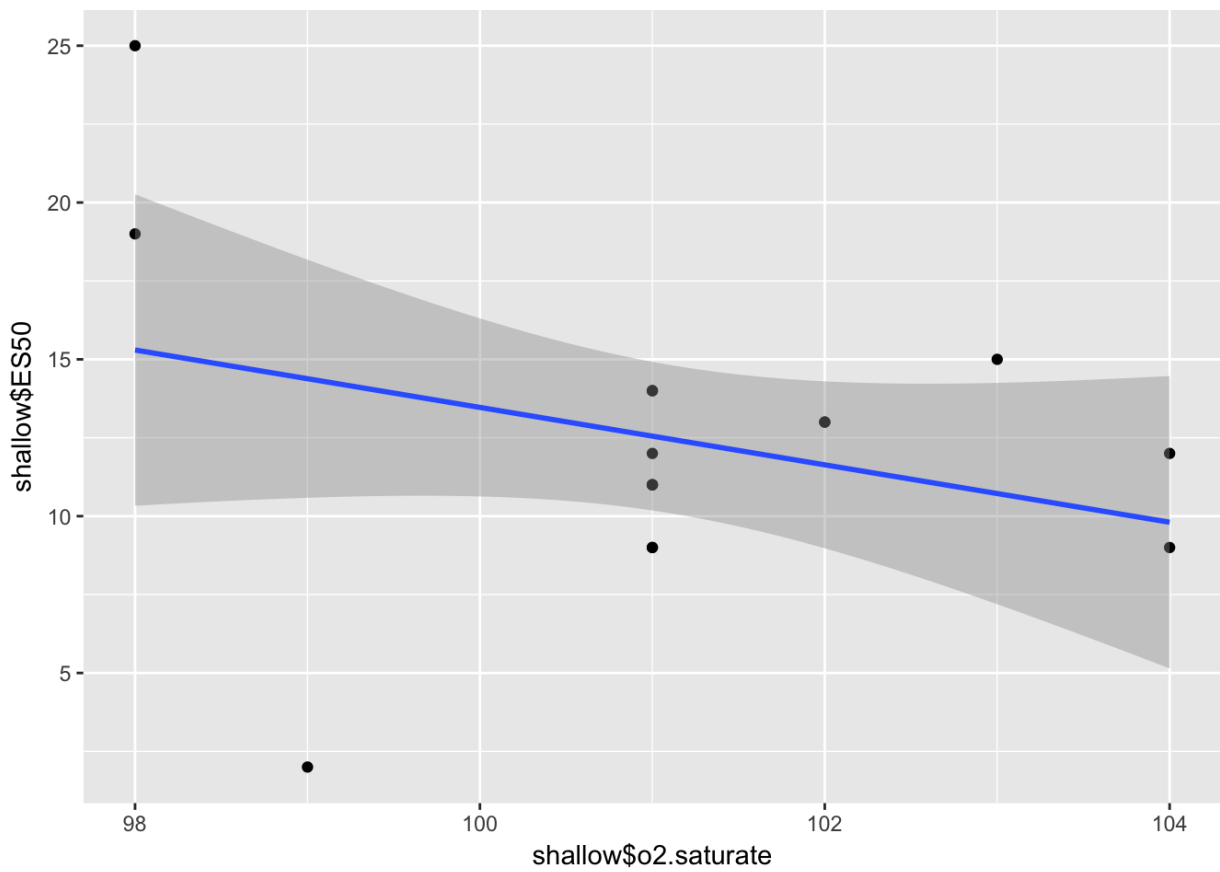

```
qplot(shallow$salinity, shallow$ES50) + geom_smooth(method = "glm")
```

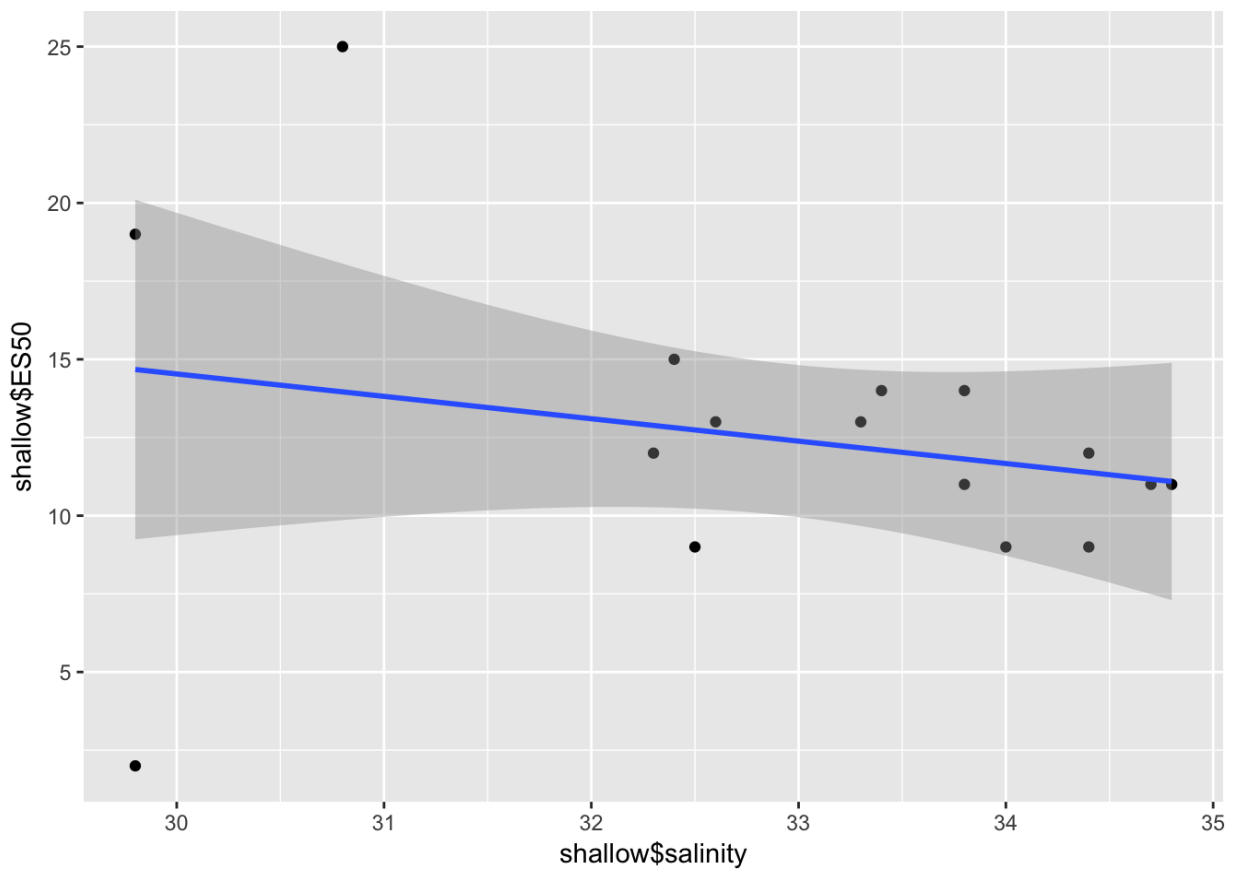

```
qplot(shallow$nitrate, shallow$ES50) + geom_smooth(method = "glm")
```

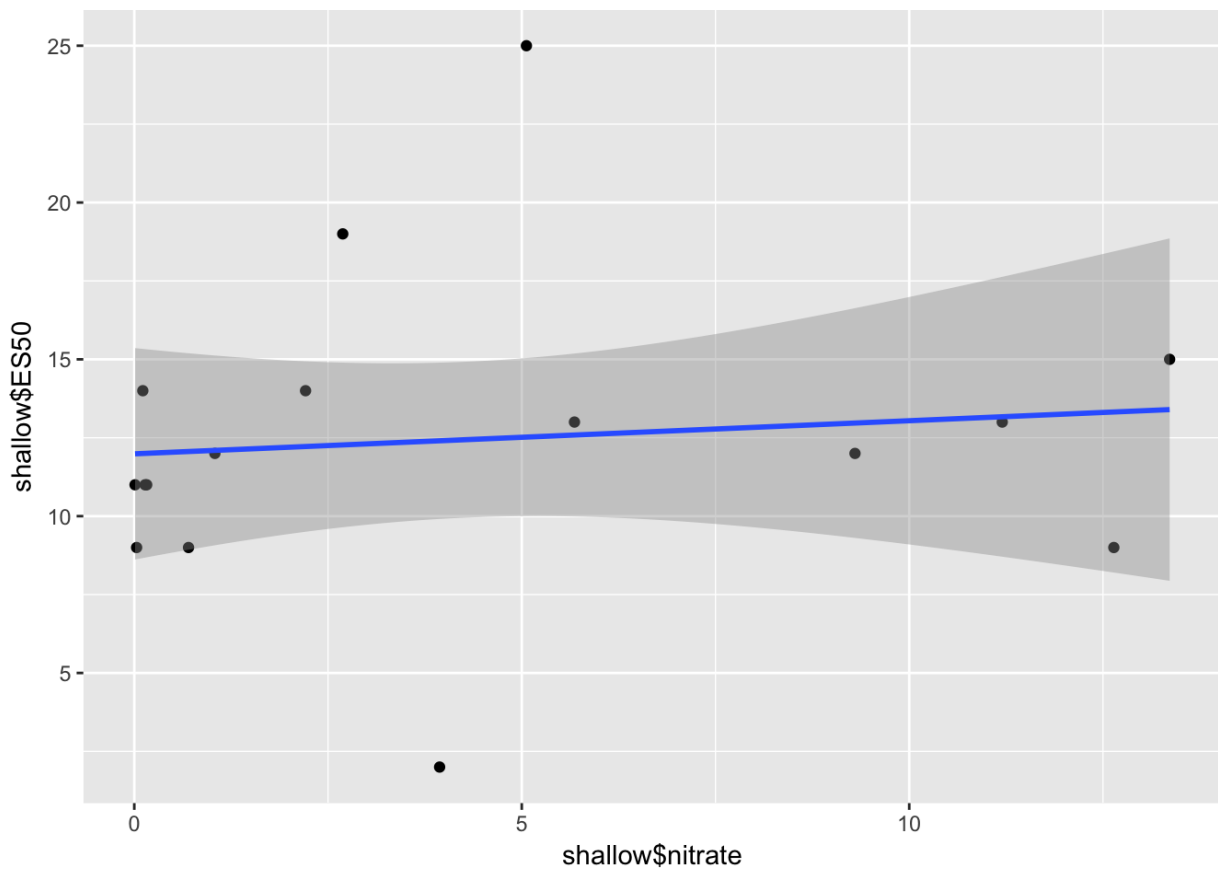

## Deep water

### Data load-in and visualization

First we're going to load in our data and then trim the data frame down to just the columns we need.

```

deep <- read.csv("deep.5.degree.csv")
analysis.cols <- c("area", "num.records", "num.species", "ES50", "dissolved.oxygen"
, "temp", "chlorophyll", "current", "salinity", "nitrate")
deep <- deep[,analysis.cols]
deep <- deep[complete.cases(deep),]
corrplot(cor(deep))

```

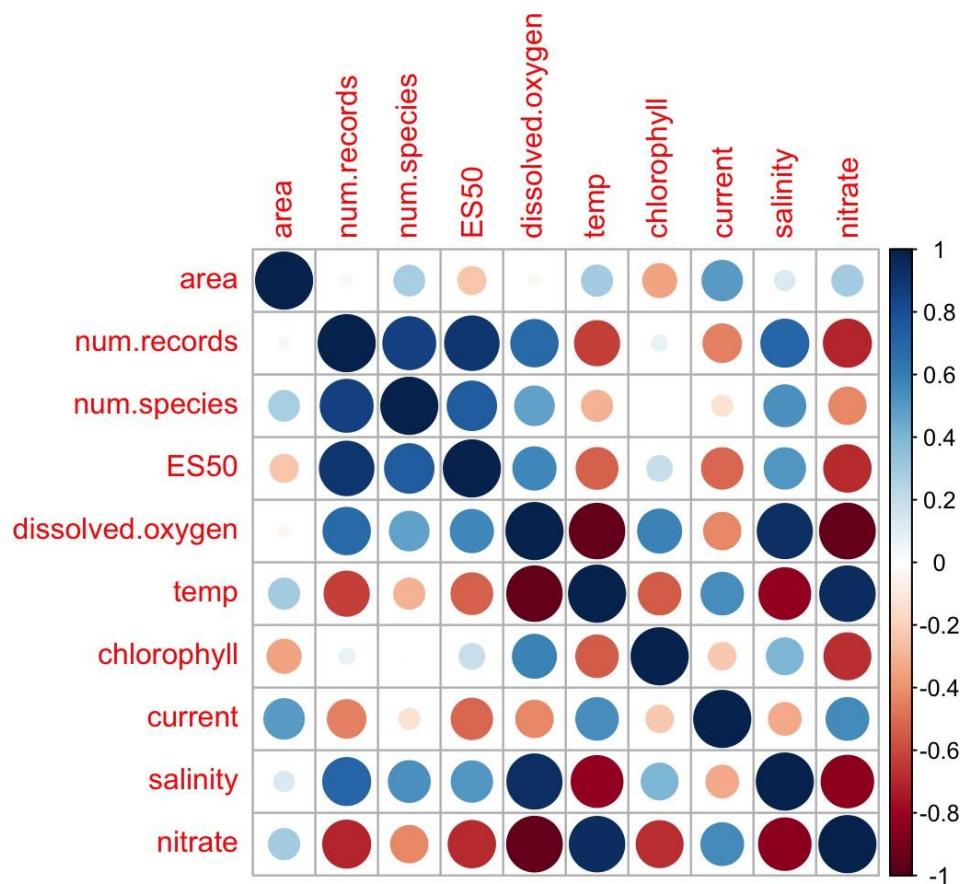

## GLMs for number of species, deep water

We're going to develop a number of GLMs here. The "intercept" glm represents the fit of a model that assumes no relationship between the species counts and the environment and no spatial autocorrelation. The "latlon" model represents the fit of a model that fits spatial autocorrelation, but no environmental effects. The "env" model represents the combined effects of all environmental predictors, and the remainder of the models ("temp", "oxygen", etc.) estimate the effects of a single predictor at a time.

```
deep.numsp.intercept <- glm(num.species ~ 1, family = "poisson", data = deep)
summary(deep.numsp.intercept)
```

```
##
## Call:
## glm(formula = num.species ~ 1, family = "poisson", data = deep)
##
## Deviance Residuals:
##      Min       1Q   Median       3Q      Max
## -34.368  -14.677   -8.063   11.747   43.628
##
## Coefficients:
##              Estimate Std. Error z value Pr(>|z|)
## (Intercept) 6.621139    0.009423   702.7  <2e-16 ***
## ---
## Signif. codes:  0 '***' 0.001 '**' 0.01 '*' 0.05 '.' 0.1 ' ' 1
##
## (Dispersion parameter for poisson family taken to be 1)
##
## Null deviance: 6924.5  on 14  degrees of freedom
## Residual deviance: 6924.5  on 14  degrees of freedom
## AIC: 7047.2
##
## Number of Fisher Scoring iterations: 5
```

```
deep.numsp.numrec <- glm(num.species ~ num.records, family = "poisson", data = deep)
summary(deep.numsp.numrec)
```

```
##
## Call:
## glm(formula = num.species ~ num.records, family = "poisson",
##      data = deep)
##
## Deviance Residuals:
##      Min       1Q   Median       3Q      Max
## -24.113  -10.134   -4.026    6.374   26.968
##
## Coefficients:
##              Estimate Std. Error z value Pr(>|z|)
## (Intercept) 6.041e+00  1.443e-02  418.60  <2e-16 ***
## num.records 4.357e-04  6.318e-06   68.97  <2e-16 ***
## ---
## Signif. codes:  0 '***' 0.001 '**' 0.01 '*' 0.05 '.' 0.1 ' ' 1
##
## (Dispersion parameter for poisson family taken to be 1)
##
## Null deviance: 6924.5  on 14  degrees of freedom
## Residual deviance: 3013.2 on 13 degrees of freedom
## AIC: 3138
##
## Number of Fisher Scoring iterations: 5
```

```
deep.numsp.temp <- glm(num.species ~ num.records + temp, family = "poisson", data =
deep)
summary(deep.numsp.temp)
```

```
##
## Call:
## glm(formula = num.species ~ num.records + temp, family = "poisson",
##      data = deep)
##
## Deviance Residuals:
##      Min       1Q   Median       3Q      Max
## -27.583   -8.959   -1.936    9.030   15.068
##
## Coefficients:
##              Estimate Std. Error z value Pr(>|z|)
## (Intercept) 5.386e+00  2.904e-02  185.44  <2e-16 ***
## num.records 6.214e-04  9.376e-06   66.28  <2e-16 ***
## temp        3.713e-01  1.367e-02   27.16  <2e-16 ***
## ---
## Signif. codes:  0 '***' 0.001 '**' 0.01 '*' 0.05 '.' 0.1 ' ' 1
##
## (Dispersion parameter for poisson family taken to be 1)
##
## Null deviance: 6924.5  on 14  degrees of freedom
## Residual deviance: 2303.3 on 12 degrees of freedom
## AIC: 2430
##
## Number of Fisher Scoring iterations: 5
```

```
deep.numsp.oxygen <- glm(num.species ~ num.records + dissolved.oxygen, family =
"poisson", data = deep)
summary(deep.numsp.oxygen)
```

```
##
## Call:
## glm(formula = num.species ~ num.records + dissolved.oxygen, family = "poisson",
##      data = deep)
##
## Deviance Residuals:
##      Min       1Q   Median       3Q      Max
## -27.384   -9.683   -3.208   10.448   20.957
##
## Coefficients:
##              Estimate Std. Error z value Pr(>|z|)
## (Intercept)  6.307e+00  2.787e-02  226.29  <2e-16 ***
## num.records  5.319e-04  1.096e-05   48.53  <2e-16 ***
## dissolved.oxygen -2.340e-03  2.154e-04  -10.87  <2e-16 ***
## ---
## Signif. codes:  0 '***' 0.001 '**' 0.01 '*' 0.05 '.' 0.1 ' ' 1
##
## (Dispersion parameter for poisson family taken to be 1)
##
## Null deviance: 6924.5  on 14  degrees of freedom
## Residual deviance: 2891.7 on 12 degrees of freedom
## AIC: 3018.4
##
## Number of Fisher Scoring iterations: 5
```

```
deep.numsp.chlorophyll <- glm(num.species ~ num.records + chlorophyll, family =
"poisson", data = deep)
summary(deep.numsp.chlorophyll)
```

```
##
## Call:
## glm(formula = num.species ~ num.records + chlorophyll, family = "poisson",
##      data = deep)
##
## Deviance Residuals:
##      Min       1Q   Median       3Q      Max
## -24.058  -10.067   -3.955    6.157   27.056
##
## Coefficients:
##              Estimate Std. Error z value Pr(>|z|)
## (Intercept)  5.184e+00  8.279e-01  6.262 3.81e-10 ***
## num.records  4.362e-04  6.342e-06  68.776 < 2e-16 ***
## chlorophyll  1.939e+02  1.874e+02   1.035   0.301
## ---
## Signif. codes:  0 '***' 0.001 '**' 0.01 '*' 0.05 '.' 0.1 ' ' 1
##
## (Dispersion parameter for poisson family taken to be 1)
##
## Null deviance: 6924.5  on 14  degrees of freedom
## Residual deviance: 3012.2  on 12  degrees of freedom
## AIC: 3138.9
##
## Number of Fisher Scoring iterations: 5
```

```
deep.numsp.current <- glm(num.species ~ num.records + current, family = "poisson",
data = deep)
summary(deep.numsp.current)
```

```
##
## Call:
## glm(formula = num.species ~ num.records + current, family = "poisson",
##      data = deep)
##
## Deviance Residuals:
##      Min       1Q   Median       3Q      Max
## -20.1499  -11.5189   0.9779   6.6915  17.6137
##
## Coefficients:
##              Estimate Std. Error z value Pr(>|z|)
## (Intercept) 4.747e+00  4.264e-02  111.33  <2e-16 ***
## num.records 6.496e-04  9.417e-06   68.98  <2e-16 ***
## current     1.208e+02  3.541e+00   34.13  <2e-16 ***
## ---
## Signif. codes:  0 '***' 0.001 '**' 0.01 '*' 0.05 '.' 0.1 ' ' 1
##
## (Dispersion parameter for poisson family taken to be 1)
##
## Null deviance: 6924.5  on 14  degrees of freedom
## Residual deviance: 1915.3 on 12 degrees of freedom
## AIC: 2042
##
## Number of Fisher Scoring iterations: 4
```

```
deep.numsp.salinity <- glm(num.species ~ num.records + salinity, family = "poisson",
data = deep)
summary(deep.numsp.salinity)
```

```
##
## Call:
## glm(formula = num.species ~ num.records + salinity, family = "poisson",
##      data = deep)
##
## Deviance Residuals:
##      Min       1Q   Median       3Q      Max
## -27.744  -9.292  -3.172   7.553  23.695
##
## Coefficients:
##              Estimate Std. Error z value Pr(>|z|)
## (Intercept)  3.348e+01  3.423e+00   9.780 < 2e-16 ***
## num.records  5.147e-04  1.183e-05  43.513 < 2e-16 ***
## salinity     -7.938e-01  9.905e-02  -8.014 1.11e-15 ***
## ---
## Signif. codes:  0 '***' 0.001 '**' 0.01 '*' 0.05 '.' 0.1 ' ' 1
##
## (Dispersion parameter for poisson family taken to be 1)
##
## Null deviance: 6924.5  on 14  degrees of freedom
## Residual deviance: 2949.8 on 12 degrees of freedom
## AIC: 3076.5
##
## Number of Fisher Scoring iterations: 5
```

```
deep.numsp.nitrate <- glm(num.species ~ num.records + nitrate, family = "poisson"
, data = deep)
summary(deep.numsp.nitrate)
```

```
##
## Call:
## glm(formula = num.species ~ num.records + nitrate, family = "poisson",
##      data = deep)
##
## Deviance Residuals:
##      Min       1Q   Median       3Q      Max
## -25.694  -9.033  -2.933   10.986   20.035
##
## Coefficients:
##              Estimate Std. Error z value Pr(>|z|)
## (Intercept) 4.348e+00  7.881e-02  55.16  <2e-16 ***
## num.records 6.670e-04  1.227e-05  54.37  <2e-16 ***
## nitrate     4.146e-02  1.871e-03  22.16  <2e-16 ***
## ---
## Signif. codes:  0 '***' 0.001 '**' 0.01 '*' 0.05 '.' 0.1 ' ' 1
##
## (Dispersion parameter for poisson family taken to be 1)
##
## Null deviance: 6924.5  on 14  degrees of freedom
## Residual deviance: 2473.9  on 12  degrees of freedom
## AIC: 2600.7
##
## Number of Fisher Scoring iterations: 5
```

## Model selection for number of species, deep water

Here we use AIC to compare models for goodness of fit while penalizing for overparameterization. Models are ranked in order of AIC score, with lowest scoring model (model with the best compromise between fit and complexity) first in the list. The delta AIC represents how much the AIC score for each model differs from the top model, and can be used as an estimate of the relative support for each model. A delta AIC of 2 is considered to be potentially a significantly better fit, with higher delta AICs between models indicating increasingly larger differences in model fit while correcting for the number of parameters.



```

deep.numsp.models <- list(deep.numsp.intercept = deep.numsp.intercept,
  deep.numsp.temp = deep.numsp.temp,
  deep.numsp.numrec = deep.numsp.numrec,
  deep.numsp.oxygen = deep.numsp.oxygen,
  deep.numsp.chlorophyll = deep.numsp.chlorophyll,
  deep.numsp.current = deep.numsp.current,
  deep.numsp.salinity = deep.numsp.salinity,
  deep.numsp.nitrate = deep.numsp.nitrate)
deep.numsp.aic.df <- data.frame(Model = names(deep.numsp.models),
  AIC = sapply(deep.numsp.models, function(x) AICc(x)),
  akaike.weights(sapply(deep.numsp.models, function(x) AI
Cc(x))))

```

```

deep.numsp.aic.df <- deep.numsp.aic.df[order(deep.numsp.aic.df$AIC),]
deep.numsp.aic.df$Cumulative.Weight <- cumsum(deep.numsp.aic.df$weights)

```

```

kable(deep.numsp.aic.df, row.names = FALSE)

```

| Model                  | AIC      | deltaAIC  | rel.LL | weights | Cumulative.Weight |
|------------------------|----------|-----------|--------|---------|-------------------|
| deep.numsp.current     | 2044.206 | 0.0000    | 1      | 1       | 1                 |
| deep.numsp.temp        | 2432.181 | 387.9754  | 0      | 0       | 1                 |
| deep.numsp.nitrate     | 2602.863 | 558.6573  | 0      | 0       | 1                 |
| deep.numsp.oxygen      | 3020.607 | 976.4008  | 0      | 0       | 1                 |
| deep.numsp.salinity    | 3078.730 | 1034.5245 | 0      | 0       | 1                 |
| deep.numsp.numrec      | 3138.989 | 1094.7832 | 0      | 0       | 1                 |
| deep.numsp.chlorophyll | 3141.111 | 1096.9052 | 0      | 0       | 1                 |
| deep.numsp.intercept   | 7047.531 | 5003.3255 | 0      | 0       | 1                 |

```

write.csv(deep.numsp.aic.df, file = "deep.5.degree.numsp.aic.csv")

```

Here we see that the models containing temperature and current have the best fit, with everything else having a delta AIC over 2. Notably the “numrec” model has a delta AIC over that threshold, indicating that temperature and current have some level of explanatory power for number of species.

## Plots for number of species, deep water

Here we plot the effects of each environmental predictor from its respective single-variable model.

```

qplot(deep$temp, predict(deep.numsp.temp, deep)) + geom_smooth(method = "glm")

```

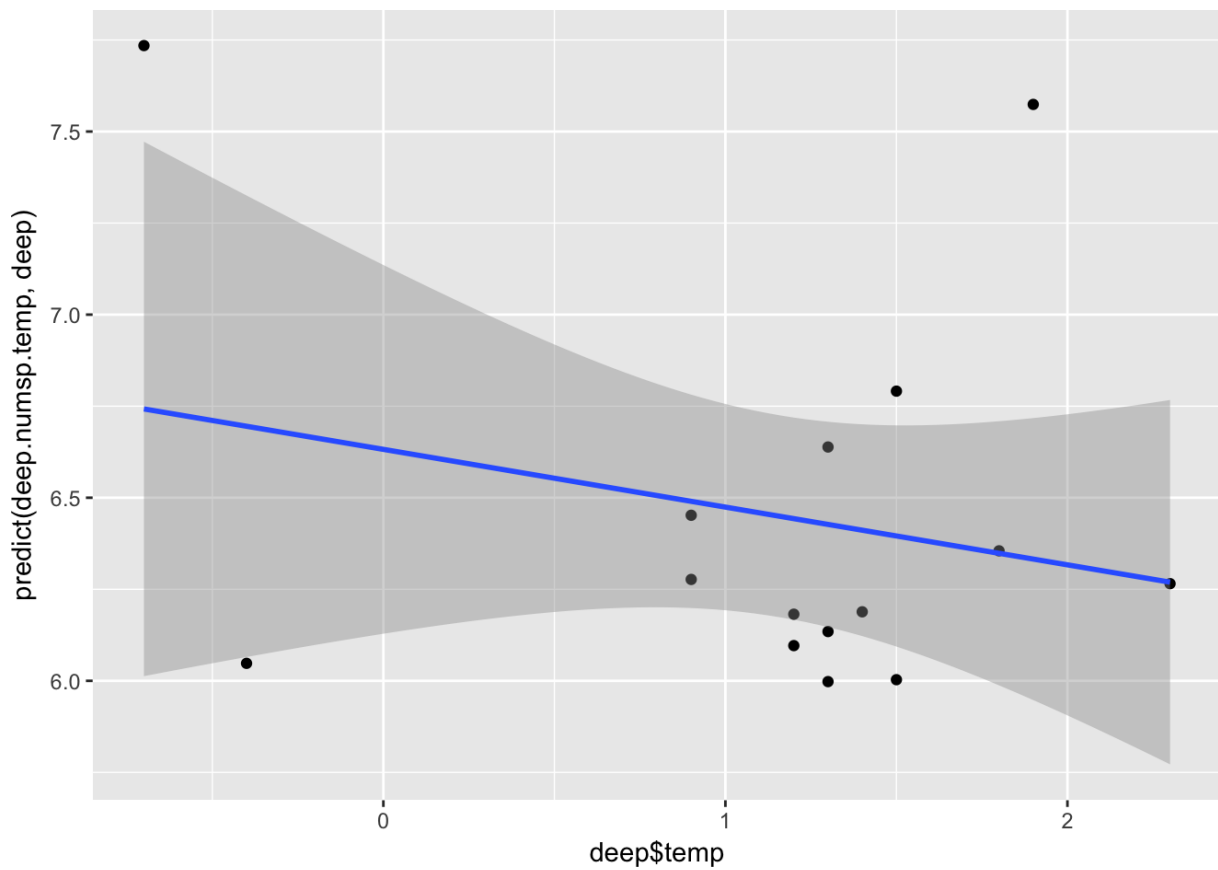

```
qplot(deep$num.species, predict(deep.numsp.numrec, deep)) + geom_smooth(method = "glm")
```

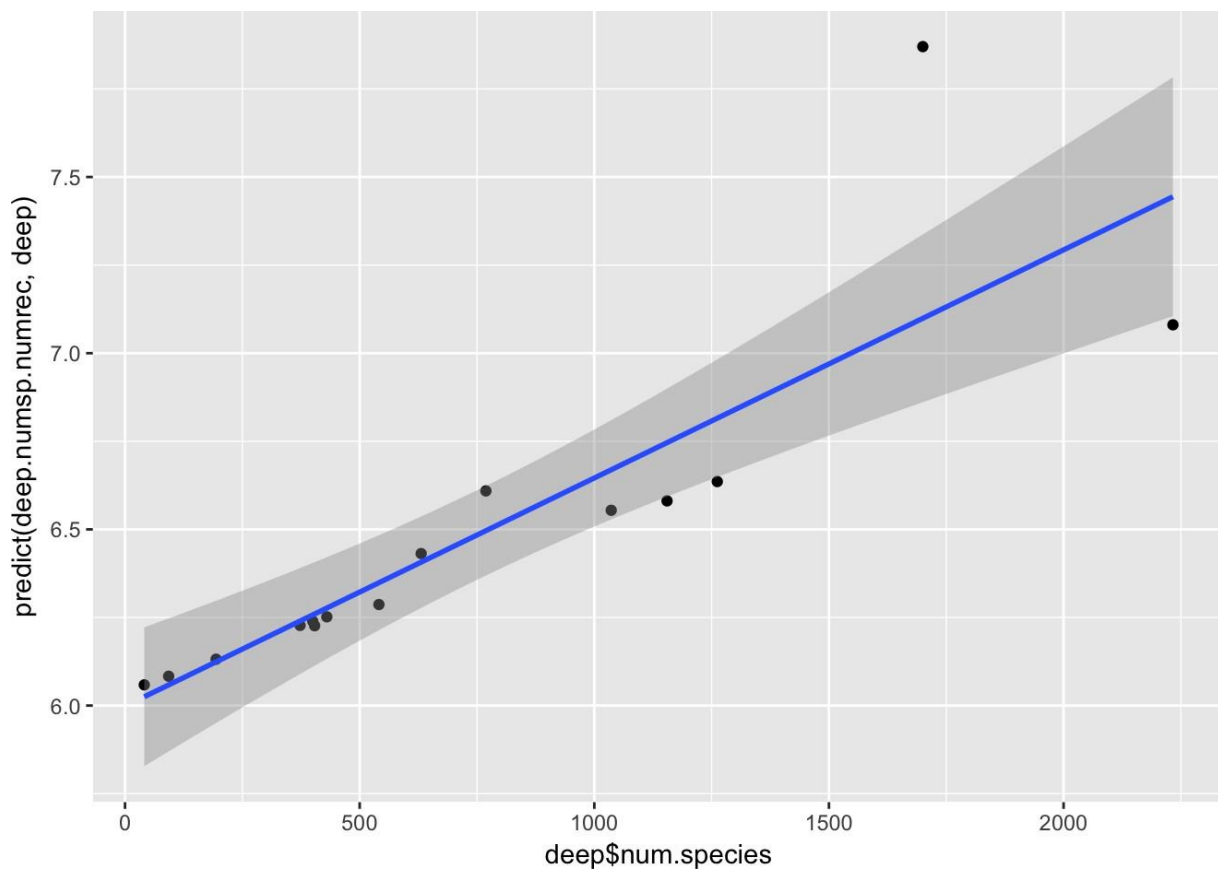

```
qplot(deep$dissolved.oxygen, predict(deep.numsp.oxygen, deep)) + geom_smooth(method = "glm")
```

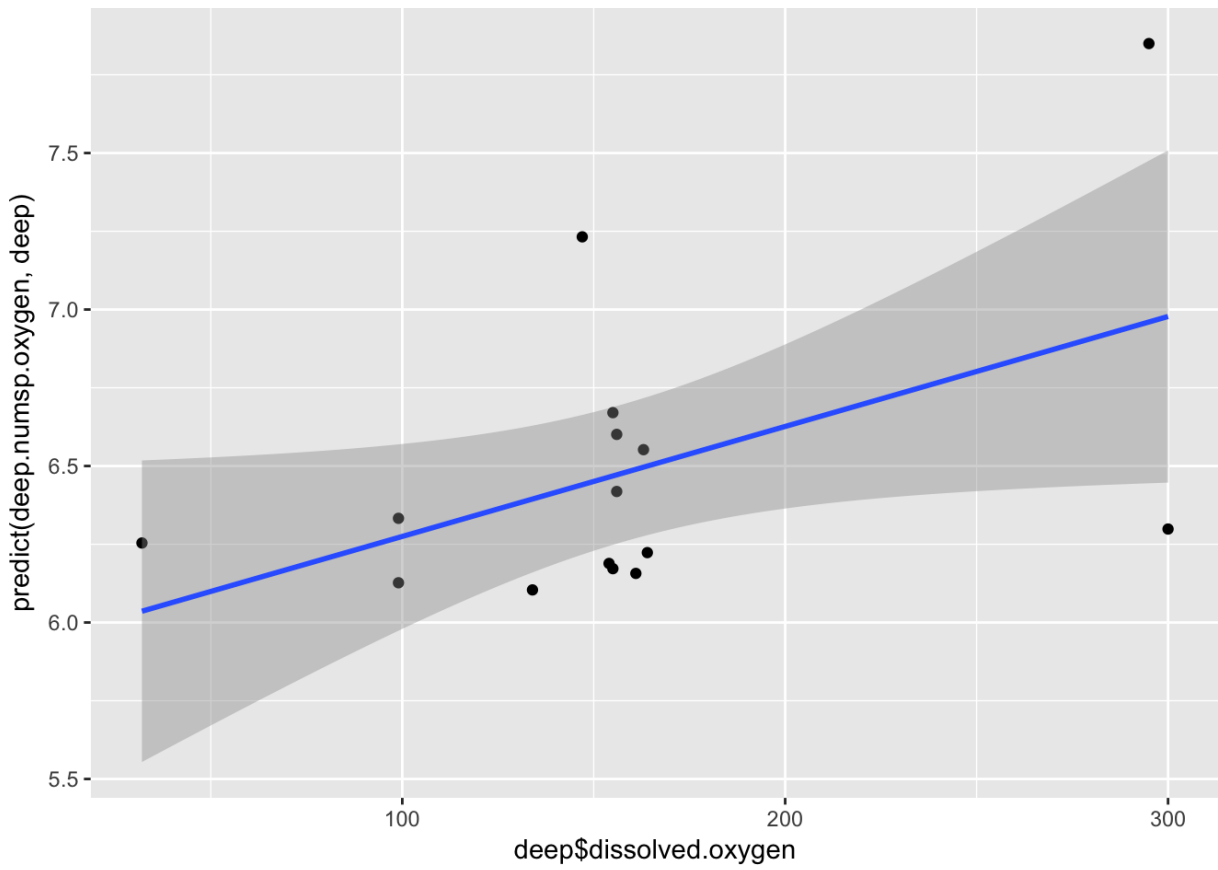

```
qplot(deep$chlorophyll, predict(deep.numsp.chlorophyll, deep)) + geom_smooth(method = "glm")
```

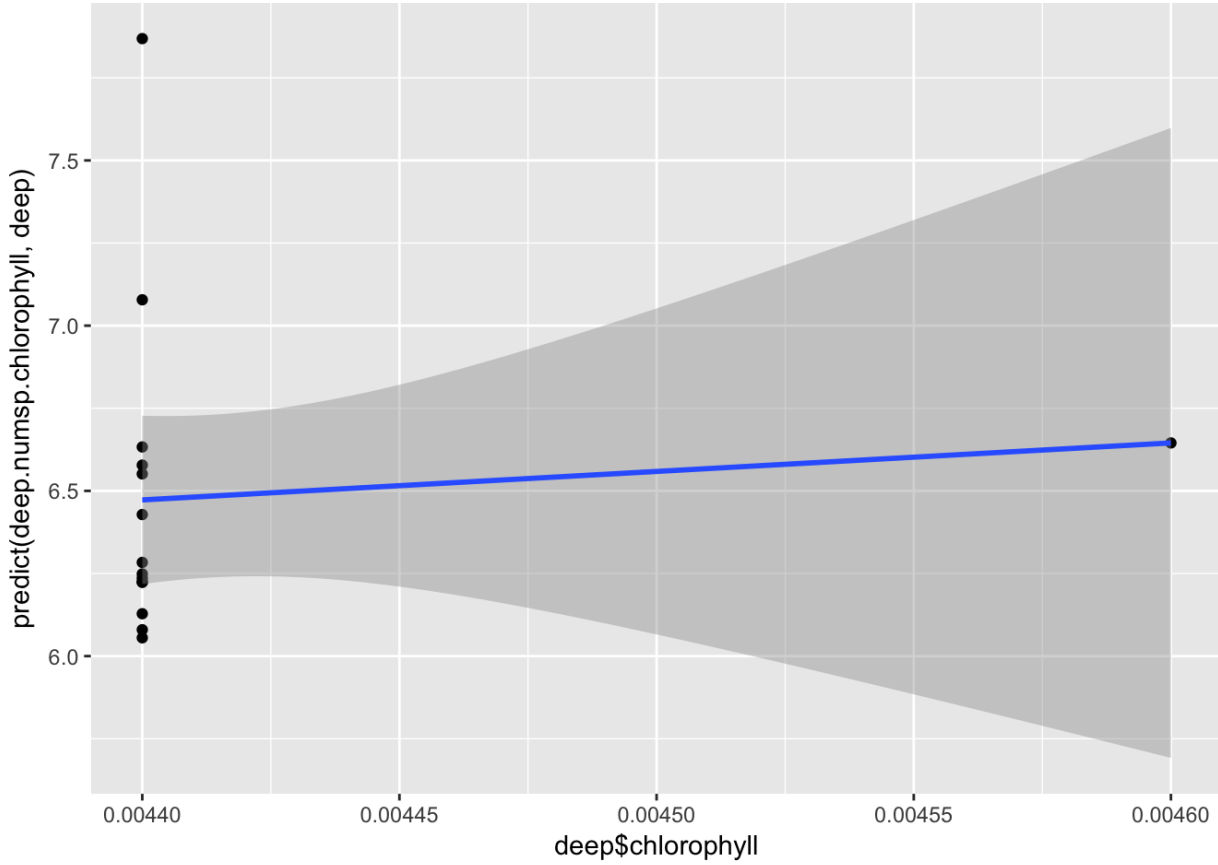

```
qplot(deep$current, predict(deep.numsp.current, deep)) + geom_smooth(method = "glm")
)
```

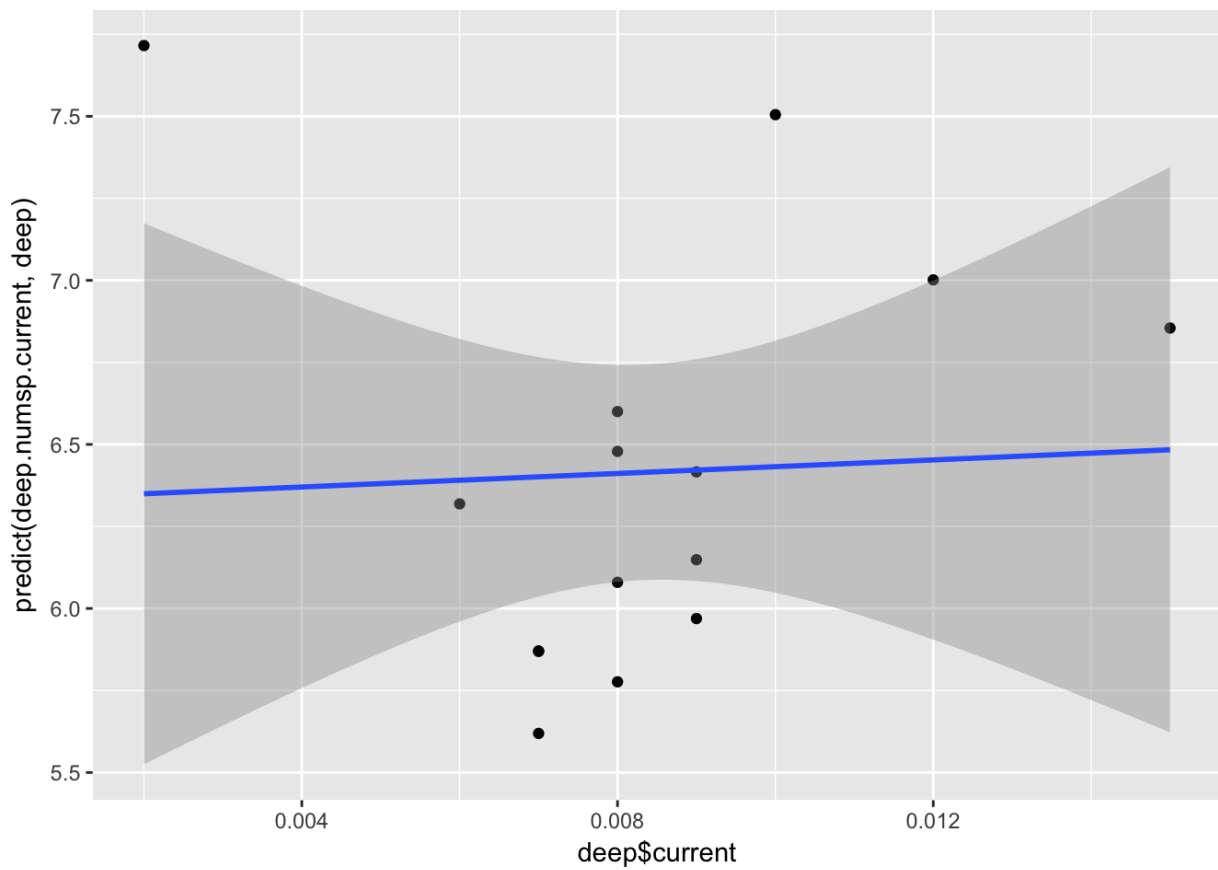

```
qplot(deep$salinity, predict(deep.numsp.salinity, deep)) + geom_smooth(method = "glm")
```

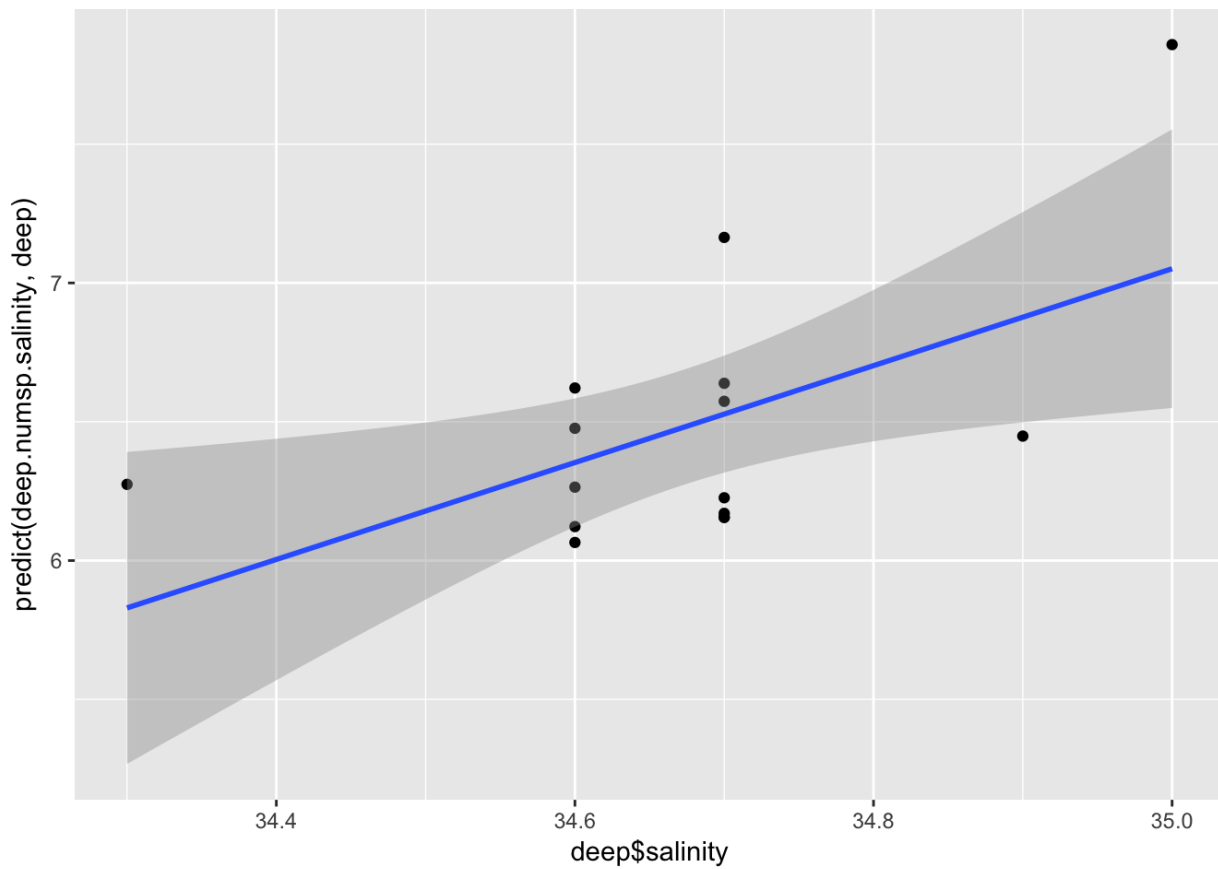

```
qplot(deep$nitrate, predict(deep.numsp.nitrate, deep)) + geom_smooth(method = "glm")
```

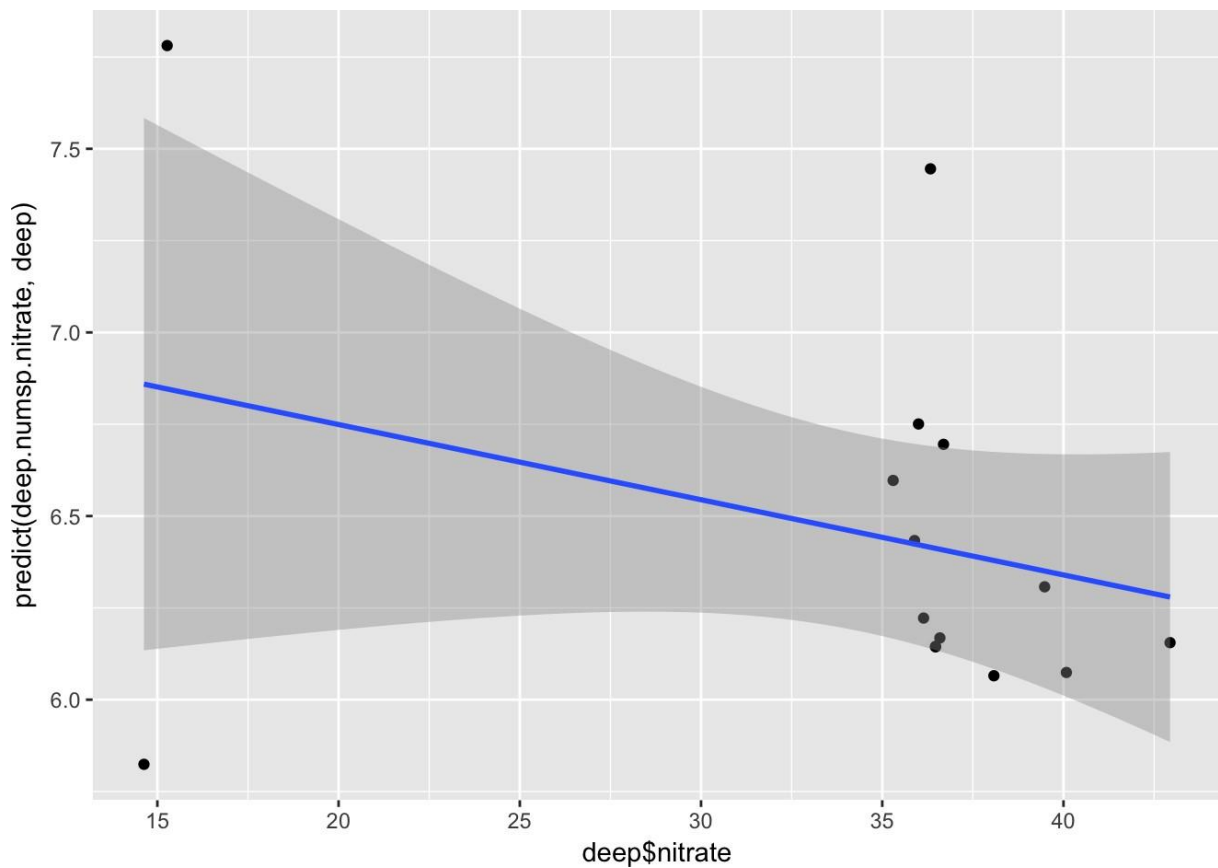

## GLMs for ES50, deep water

These models are identical to the above, except that the response variable is the species richness estimated from the rarefaction curves. These are meant to be estimates of species richness if all sites were sampled equally. Since these measurements are intended to take sampling effort into account, we exclude the "num.records" term for these models.

```
deep.es50.intercept <- glm(ES50 ~ 1, family = "poisson", data = deep)
summary(deep.es50.intercept)
```

```
##
## Call:
## glm(formula = ES50 ~ 1, family = "poisson", data = deep)
##
## Deviance Residuals:
##      Min       1Q   Median       3Q      Max
## -1.8427  -1.0814  -0.3752   0.1541   3.9880
##
## Coefficients:
##              Estimate Std. Error z value Pr(>|z|)
## (Intercept)  2.66723    0.06804   39.2 <2e-16 ***
## ---
## Signif. codes:  0 '***' 0.001 '**' 0.01 '*' 0.05 '.' 0.1 ' ' 1
##
## (Dispersion parameter for poisson family taken to be 1)
##
## Null deviance: 35.111  on 14  degrees of freedom
## Residual deviance: 35.111  on 14  degrees of freedom
## AIC: 103.75
##
## Number of Fisher Scoring iterations: 4
```

```
deep.es50.temp <- glm(ES50 ~ temp, family = "poisson", data = deep)
summary(deep.es50.temp)
```

```
##
## Call:
## glm(formula = ES50 ~ temp, family = "poisson", data = deep)
##
## Deviance Residuals:
##      Min       1Q   Median       3Q      Max
## -1.7290  -0.8220  -0.2853   0.0377   3.1912
##
## Coefficients:
##              Estimate Std. Error z value Pr(>|z|)
## (Intercept)  2.95448    0.10410  28.381 < 2e-16 ***
## temp        -0.26680    0.07986  -3.341 0.000835 ***
## ---
## Signif. codes:  0 '***' 0.001 '**' 0.01 '*' 0.05 '.' 0.1 ' ' 1
##
## (Dispersion parameter for poisson family taken to be 1)
##
## Null deviance: 35.111  on 14  degrees of freedom
## Residual deviance: 24.730  on 13  degrees of freedom
## AIC: 95.373
##
## Number of Fisher Scoring iterations: 4
```

```
deep.es50.oxygen <- glm(ES50 ~ dissolved.oxygen, family = "poisson", data = deep)
summary(deep.es50.oxygen)
```

```
##
## Call:
## glm(formula = ES50 ~ dissolved.oxygen, family = "poisson", data = deep)
##
## Deviance Residuals:
##      Min       1Q   Median       3Q      Max
## -1.78608 -0.96314 -0.24994  0.05043  2.57468
##
## Coefficients:
##              Estimate Std. Error z value Pr(>|z|)
## (Intercept)  2.0903096  0.1815253  11.515 < 2e-16 ***
## dissolved.oxygen 0.0034819  0.0009681   3.597 0.000322 ***
## ---
## Signif. codes:  0 '***' 0.001 '**' 0.01 '*' 0.05 '.' 0.1 ' ' 1
##
## (Dispersion parameter for poisson family taken to be 1)
##
## Null deviance: 35.111  on 14  degrees of freedom
## Residual deviance: 22.866  on 13  degrees of freedom
## AIC: 93.509
##
## Number of Fisher Scoring iterations: 4
```

```
deep.es50.chlorophyll <- glm(ES50 ~ chlorophyll, family = "poisson", data = deep)
summary(deep.es50.chlorophyll)
```

```
##
## Call:
## glm(formula = ES50 ~ chlorophyll, family = "poisson", data = deep)
##
## Deviance Residuals:
##      Min       1Q   Median       3Q      Max
## -1.7628 -0.9985 -0.2894 -0.0095  4.0896
##
## Coefficients:
##              Estimate Std. Error z value Pr(>|z|)
## (Intercept)  -3.962      5.307 -0.747   0.455
## chlorophyll 1501.463    1201.121  1.250   0.211
##
## (Dispersion parameter for poisson family taken to be 1)
##
## Null deviance: 35.111  on 14  degrees of freedom
## Residual deviance: 33.671  on 13  degrees of freedom
## AIC: 104.31
##
## Number of Fisher Scoring iterations: 4
```

```
deep.es50.current <- glm(ES50 ~ current, family = "poisson", data = deep)
summary(deep.es50.current)
```

```
##
## Call:
## glm(formula = ES50 ~ current, family = "poisson", data = deep)
##
## Deviance Residuals:
##      Min       1Q   Median       3Q      Max
## -2.1418  -0.8155  -0.1136   0.5595   2.9705
##
## Coefficients:
##              Estimate Std. Error z value Pr(>|z|)
## (Intercept)   3.3315     0.2045  16.293 < 2e-16 ***
## current      -82.7742    24.9834  -3.313 0.000922 ***
## ---
## Signif. codes:  0 '***' 0.001 '**' 0.01 '*' 0.05 '.' 0.1 ' ' 1
##
## (Dispersion parameter for poisson family taken to be 1)
##
## Null deviance: 35.111  on 14  degrees of freedom
## Residual deviance: 24.136  on 13  degrees of freedom
## AIC: 94.779
##
## Number of Fisher Scoring iterations: 4
```

```
deep.es50.salinity <- glm(ES50 ~ salinity, family = "poisson", data = deep)
summary(deep.es50.salinity)
```

```
##
## Call:
## glm(formula = ES50 ~ salinity, family = "poisson", data = deep)
##
## Deviance Residuals:
##      Min       1Q   Median       3Q      Max
## -1.8960  -1.0256  -0.1811   0.2596   2.4965
##
## Coefficients:
##              Estimate Std. Error z value Pr(>|z|)
## (Intercept) -49.9163    15.9064  -3.138 0.001700 **
## salinity     1.5158     0.4583   3.307 0.000942 ***
## ---
## Signif. codes:  0 '***' 0.001 '**' 0.01 '*' 0.05 '.' 0.1 ' ' 1
##
## (Dispersion parameter for poisson family taken to be 1)
##
## Null deviance: 35.111  on 14  degrees of freedom
## Residual deviance: 24.250  on 13  degrees of freedom
## AIC: 94.893
##
## Number of Fisher Scoring iterations: 4
```

```
deep.es50.nitrate <- glm(ES50 ~ nitrate, family = "poisson", data = deep)
summary(deep.es50.nitrate)
```



```
##
## Call:
## glm(formula = ES50 ~ nitrate, family = "poisson", data = deep)
##
## Deviance Residuals:
##      Min       1Q   Median       3Q      Max
## -1.51928 -0.95869 -0.07878  0.16286  2.67794
##
## Coefficients:
##              Estimate Std. Error z value Pr(>|z|)
## (Intercept)  3.675190   0.237422  15.480 < 2e-16 ***
## nitrate      -0.030235   0.007086  -4.267 1.98e-05 ***
## ---
## Signif. codes:  0 '***' 0.001 '**' 0.01 '*' 0.05 '.' 0.1 ' ' 1
##
## (Dispersion parameter for poisson family taken to be 1)
##
## Null deviance: 35.111  on 14  degrees of freedom
## Residual deviance: 18.927  on 13  degrees of freedom
## AIC: 89.57
##
## Number of Fisher Scoring iterations: 4
```

## Model selection for ES50, deep water

Here we use AIC to compare models for goodness of fit while penalizing for overparameterization. Models are ranked in order of AIC score, with lowest scoring model (model with the best compromise between fit and complexity) first in the list. The delta AIC represents how much the AIC score for each model differs from the top model, and can be used as an estimate of the relative support for each model. A delta AIC of 2 is considered to be potentially a significantly better fit, with higher delta AICs between models indicating increasingly larger differences in model fit while correcting for the number of parameters.

```
deep.es50.models <- list(deep.es50.intercept = deep.es50.intercept,
                        deep.es50.temp = deep.es50.temp,
                        deep.es50.oxygen = deep.es50.oxygen,
                        deep.es50.chlorophyll = deep.es50.chlorophyll,
                        deep.es50.current = deep.es50.current,
                        deep.es50.salinity = deep.es50.salinity,
                        deep.es50.nitrate = deep.es50.nitrate)
deep.es50.aic.df <- data.frame(Model = names(deep.es50.models),
                              AIC = sapply(deep.es50.models, function(x) AICc(x)),
                              akaike.weights(sapply(deep.es50.models, function(x) AIC
c(x))))

deep.es50.aic.df <- deep.es50.aic.df[order(deep.es50.aic.df$AIC),]
deep.es50.aic.df$Cumulative.Weight <- cumsum(deep.es50.aic.df$weights)

kable(deep.es50.aic.df, row.names = FALSE)
```

| Model             | AIC      | deltaAIC | rel.LL    | weights   | Cumulative.Weight |
|-------------------|----------|----------|-----------|-----------|-------------------|
| deep.es50.nitrate | 90.57036 | 0.000000 | 1.0000000 | 0.7462194 | 0.7462194         |
| deep.es50.oxygen  | 94.50935 | 3.938991 | 0.1395273 | 0.1041179 | 0.8503373         |

| Model                 | AIC       | deltaAIC  | rel.LL    | weights   | Cumulative.Weight |
|-----------------------|-----------|-----------|-----------|-----------|-------------------|
| deep.es50.current     | 95.77905  | 5.208689  | 0.0739516 | 0.0551841 | 0.9055214         |
| deep.es50.salinity    | 95.89287  | 5.322507  | 0.0698606 | 0.0521313 | 0.9576527         |
| deep.es50.temp        | 96.37322  | 5.802862  | 0.0549445 | 0.0410007 | 0.9986534         |
| deep.es50.intercept   | 104.06178 | 13.491417 | 0.0011759 | 0.0008775 | 0.9995309         |
| deep.es50.chlorophyll | 105.31431 | 14.743947 | 0.0006286 | 0.0004691 | 1.0000000         |

```
write.csv(deep.es50.aic.df, file = "deep.5.degree.es50.aic.csv")
```

We find that the model containing nitrate is the best fit, with other models having a delta AIC over 2. This indicates that nitrate is the best predictor for ES50 in the deep ocean.

## Plots for ES50, deep water

Here we plot the effects of each environmental predictor from its respective single-variable model.

```
qplot(deep$temp, deep$ES50) + geom_smooth(method = "glm")
```

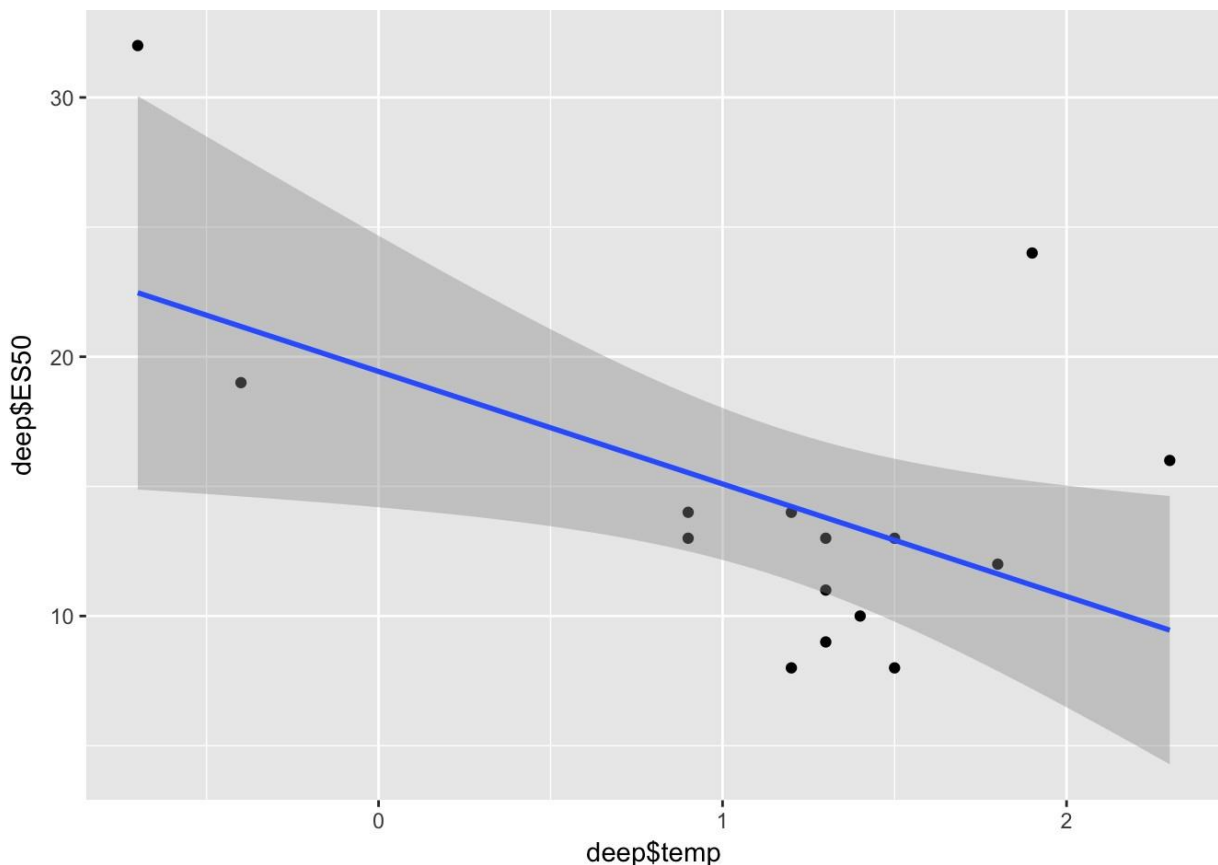

```
qplot(deep$num.records, deep$ES50) + geom_smooth(method = "glm")
```

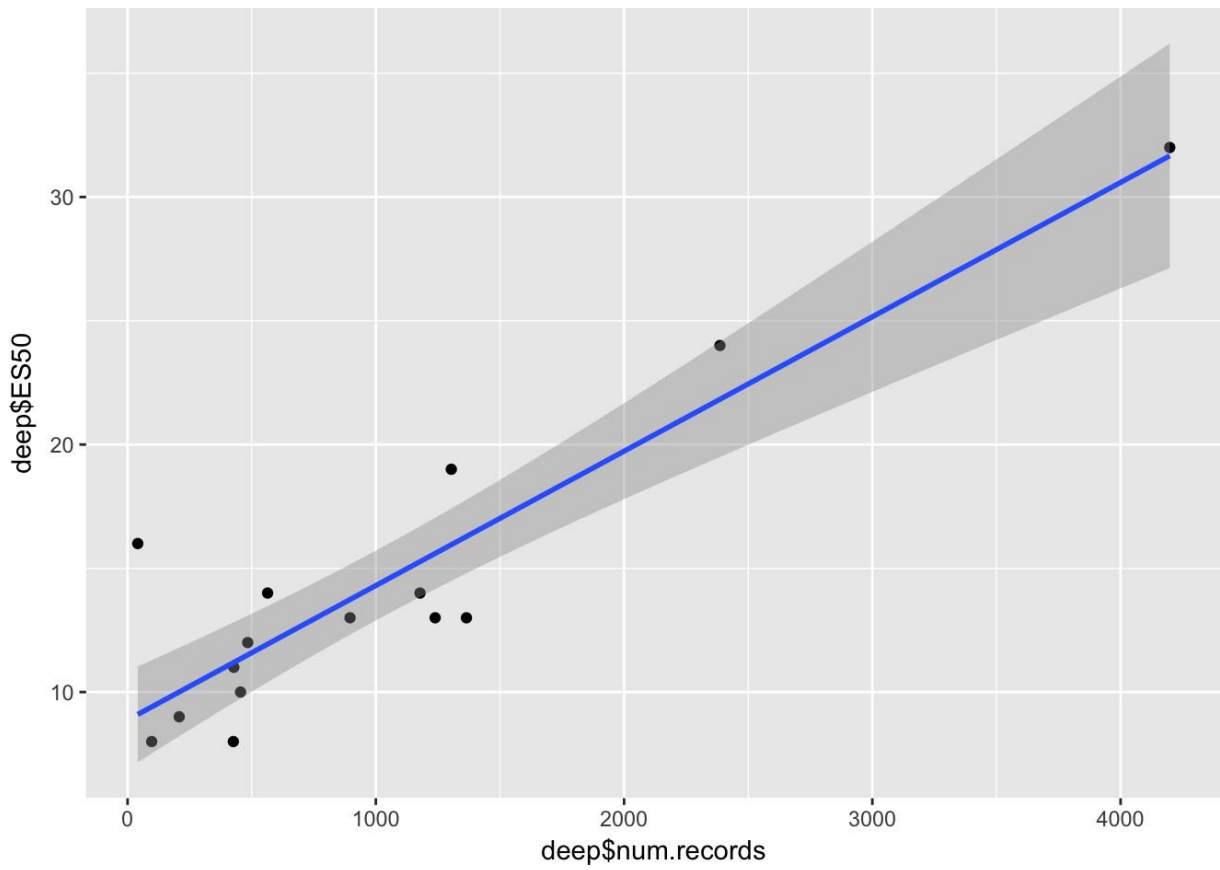

```
qplot(deep$dissolved.oxygen, deep$ES50) + geom_smooth(method = "glm")
```

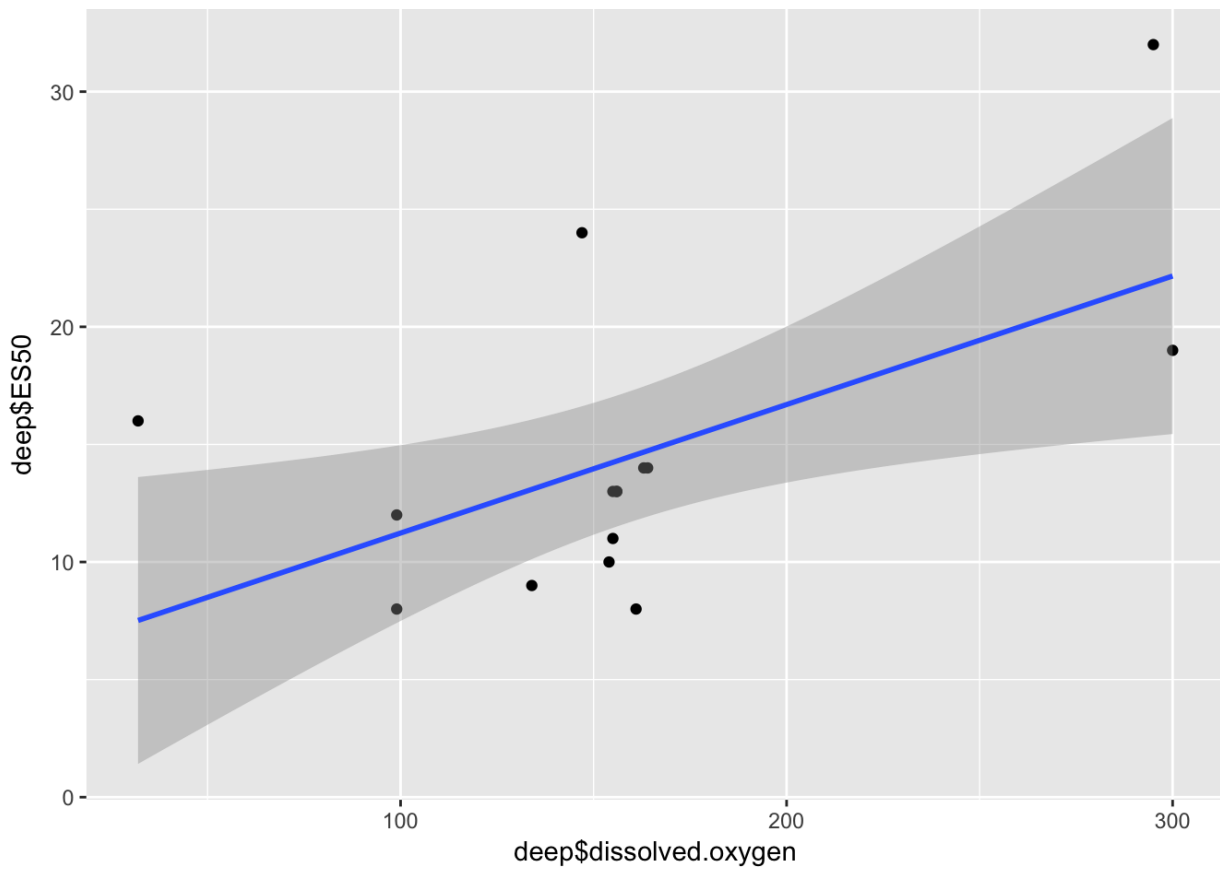

```
qplot(deep$chlorophyll, deep$ES50) + geom_smooth(method = "glm")
```

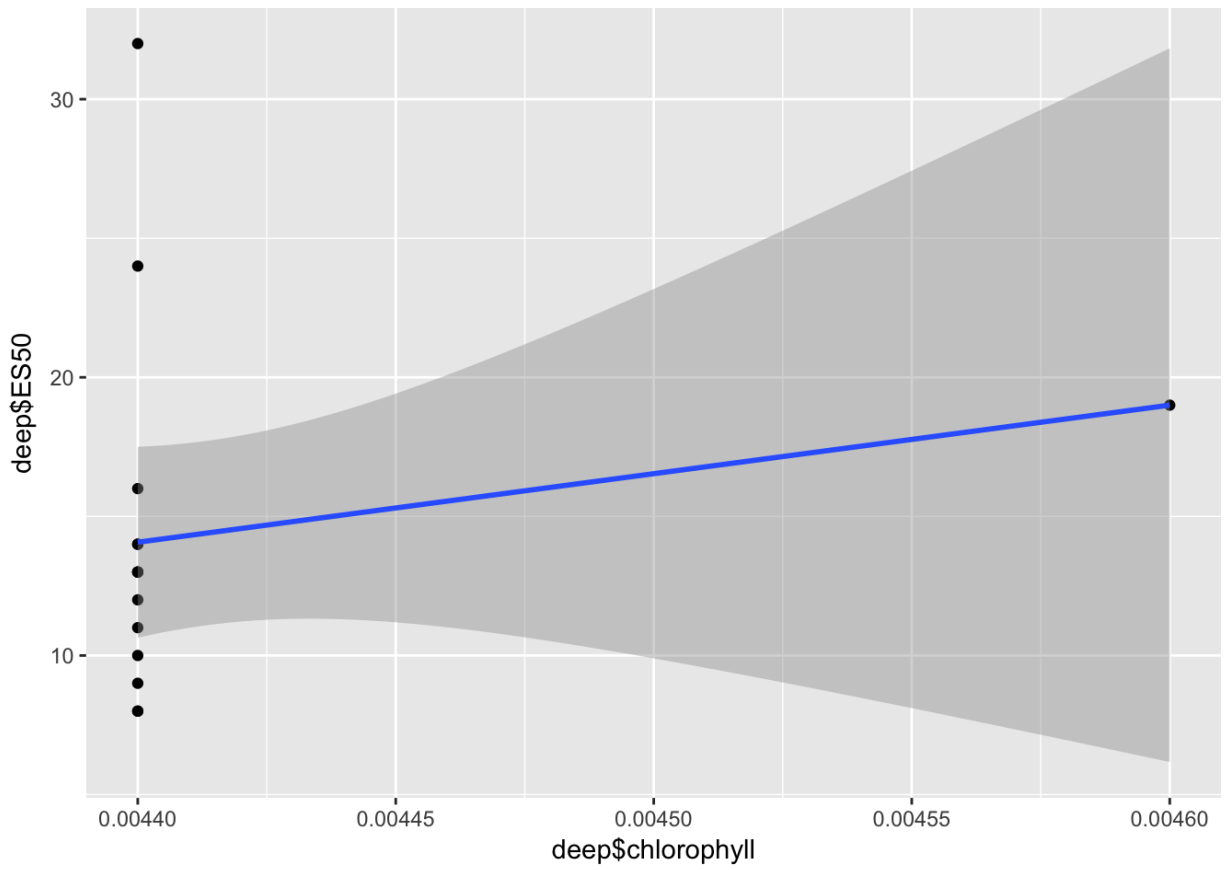

```
qplot(deep$current, deep$ES50) + geom_smooth(method = "glm")
```

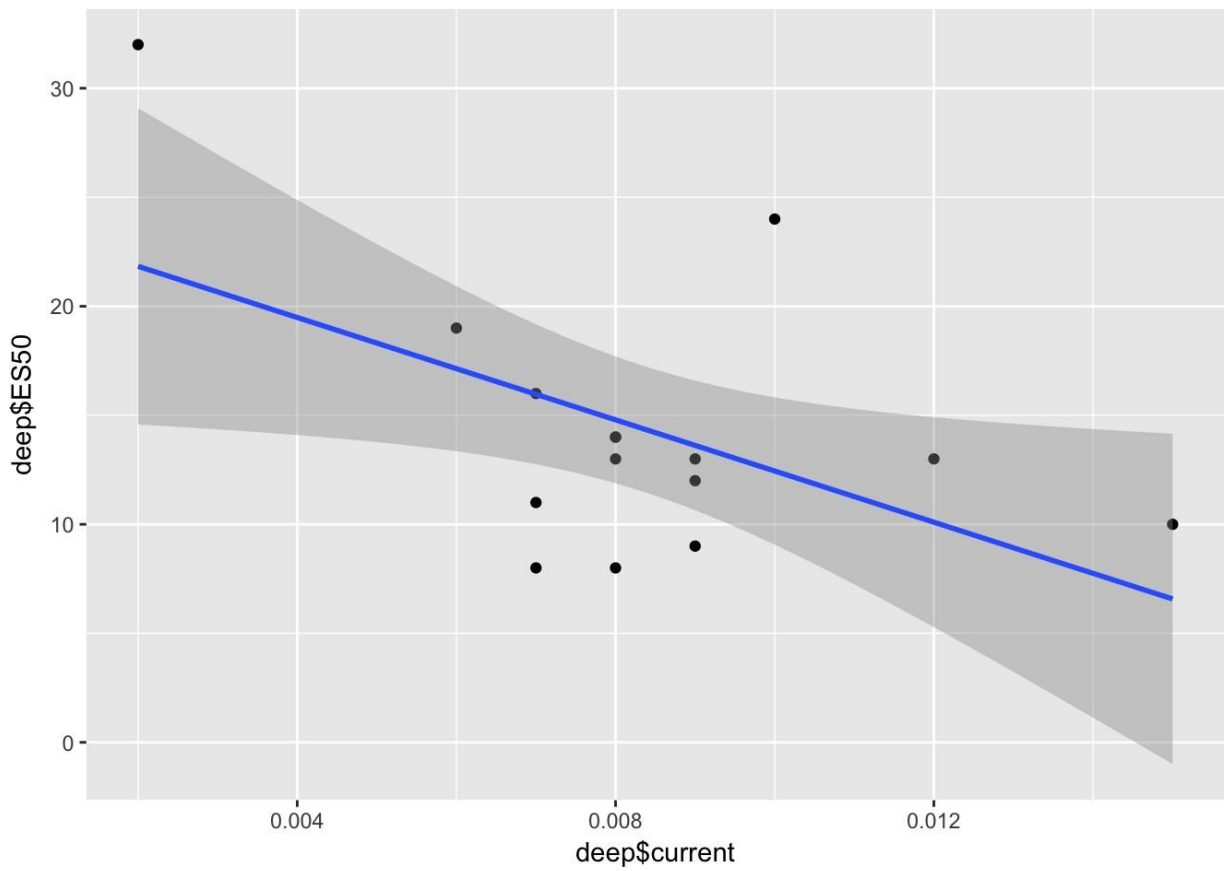

```
qplot(deep$salinity, deep$ES50) + geom_smooth(method = "glm")
```

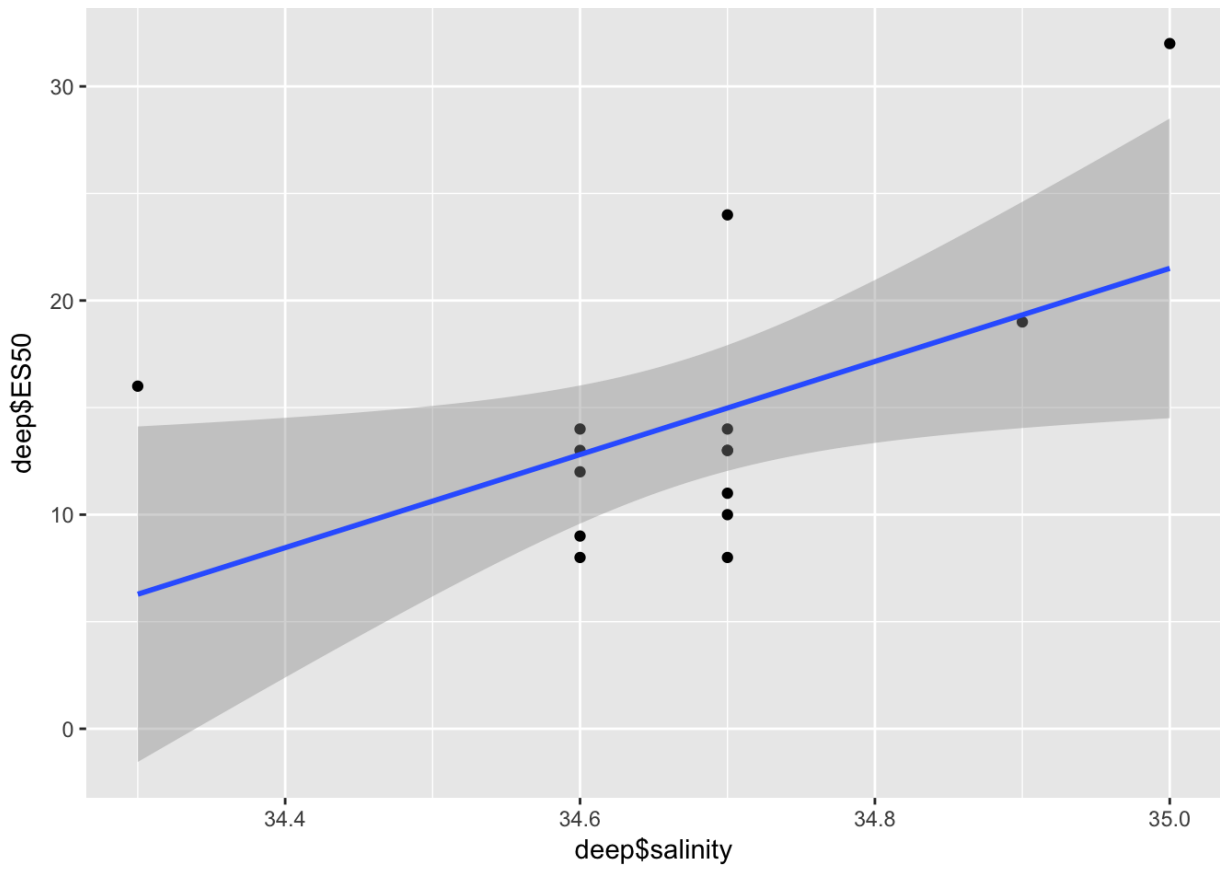

```
qplot(deep$nitrate, deep$ES50) + geom_smooth(method = "glm")
```

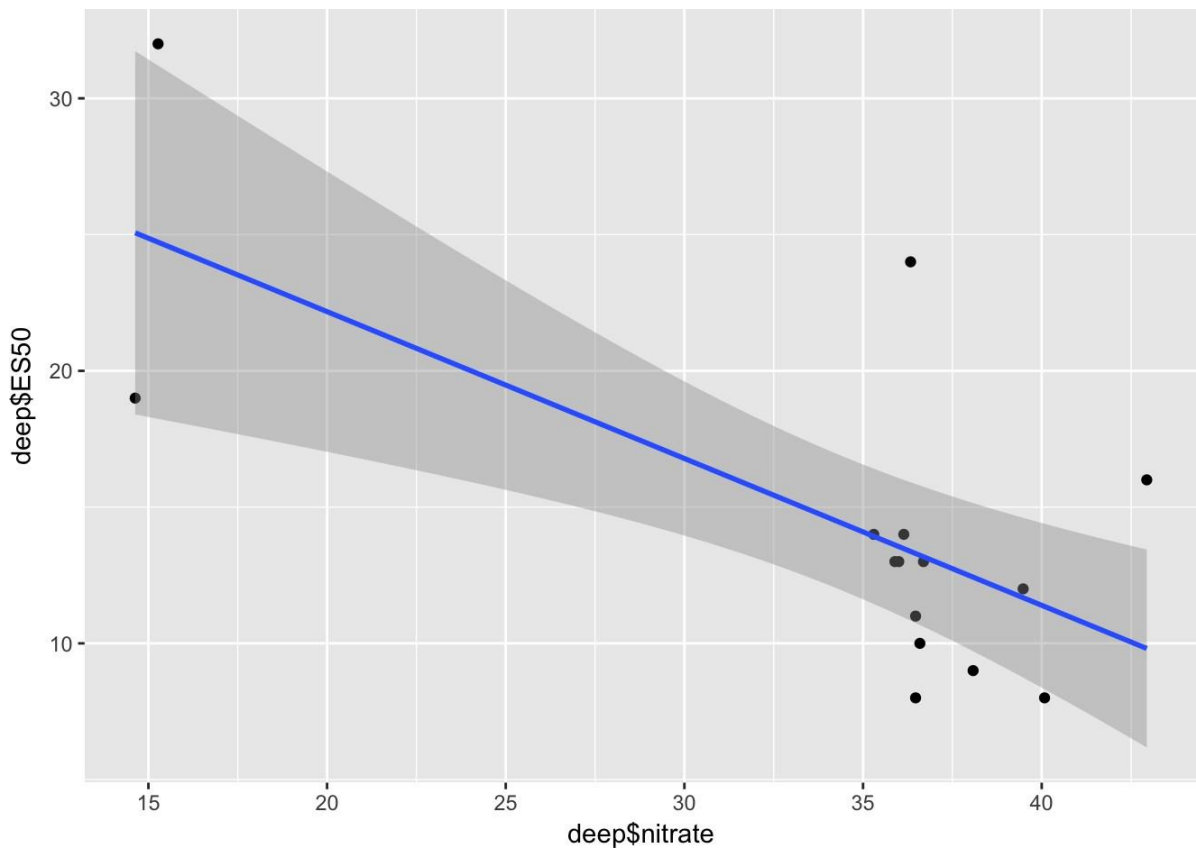

Supplement: MOESM1 [file 41598_2019_45813_MOESM1_ESM.pdf]
